# Supplementary material for: Chiral carbon–sulfur center formation via Pd-catalyzed asymmetric allylic thioetherification: synthesis of allylic thioethers
Source: Royal Society of Chemistry journal article supplement (doi:10.1039/c6ra26877c), 2016-12-24
Supplement: c6ra26877c1.pdf [file c6ra26877c1.pdf]

# Chiral Carbon-Sulfur Center Formation via Pd-Catalyzed Asymmetric Allylic Thioetherification: Synthesis of Allylic Thioethers

Jun-mai Cai,† Jue-wang Cai,† Pu-rui Zheng, Xiaorong Wang\* and Xiaoming Zhao\*

*State Key Laboratory of Pollution Control and Resource Reuse, Department of Chemistry, Tongji University, 1239 Siping Road, Shanghai 200092  
P.R. China*

*xmzhao08@mail.tongji.edu.cn*

## Supporting Information

|                                                            |    |
|------------------------------------------------------------|----|
| <b>General Experimental Details:</b> .....                 | 1  |
| <b>NMR Spectra of the compounds 3:</b> .....               | 7  |
| <b>HPLC Chromatograms of the Chiral Compounds 3:</b> ..... | 33 |
| <b>Single crystal data 3c</b> .....                        | 46 |
| <b>Reference:</b> .....                                    | 6  |

### General Experimental Details:

All air-sensitive manipulations were conducted under an argon atmosphere by standard Schlenk techniques. All glassware was dried by oven or flame immediately prior to use. All solvents were purified and dried according to standard methods prior to use, unless stated otherwise. All reagents were purchased from commercial sources and used without further purification. Sodium cyclohexanethiolate and sodium allylthiolate were prepared by reaction of cyclohexyl mercaptan or allyl mercaptan with NaH (80 % in liquid paraffin) in THF at room temperature. After stirring overnight at 0 °C to room temperature, the solvent was evaporated and the residual was washed with petroleum ether 3 times to afford sodium cyclohexanethiolate as a white powder or sodium allylthiolate as a light brown powder.<sup>1</sup> The diphenylphosphino ligands and substituted allylic carbonates<sup>2</sup> were prepared according to known procedures.

<sup>1</sup>H NMR spectra were obtained at 300 MHz or 400 MHz and recorded relative to the tetramethylsilane signal (0 ppm) or residual protio-solvent. <sup>13</sup>C NMR spectra were obtained at 75 MHz or 100 MHz, and chemical shifts were recorded relative to the solvent resonance (CDCl<sub>3</sub>, 77.0 ppm). Data for <sup>1</sup>H NMR are recorded as follows: chemical shift (δ, ppm), multiplicity (s = singlet, d = doublet, t = triplet, q = quartet, m = multiplet or unresolved, br = broad singlet, coupling constant (s) in Hz, integration). Data for <sup>13</sup>C NMR are reported in terms of chemical shift (δ, ppm).

HPLC analyses were carried out on a Waters chromatography system or Agilent 1100 HPLC

system or SHIMADZU LC-15 system. IR analyses were obtained on Nicolet FT-IR spectrometers. Flash column chromatography was performed on silica gel. Products were visualized on TLC plates by UV or by staining with KMnO<sub>4</sub> or iodine vapor.

**General procedure for Pd-catalyzed allylic thioetherification reaction:** To the solution of allylic acetate **1** (0.2 mmol, 1 equiv.) and DCM (2.0 mL) were sequentially added the catalyst made from both [Pd(C<sub>3</sub>H<sub>5</sub>)Cl]<sub>2</sub> (2.5 mol%) and **L1** (5 mol%), KOAc (0.2 mmol)/BSA (0.20 mol), and sodium thiolate **2** (0.24 mmol, 1.2 equiv.) at 0 °C under argon. After that, the reaction mixture was vigorously stirred at -10 °C for the stated time and it was stirring until the allylic acetate **1** was completely consumed. The crude residue was purified by flash column chromatography (hexane/ethyl acetate = 10/1) to provide the desired products **3**.

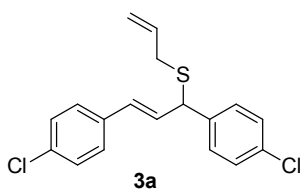

**(E)-Allyl(1,3-bis(4-chlorophenyl)allyl)sulfane (3a):** Colorless oil; 81% yield; 95% ee. The ee of the product was determined by HPLC [Daicel CHIRALPAK OJ-H (0.46 cm\*25 cm); hexane/2-propanol = 95/5; flow rate = 1.0 mL/min; detection wavelength = 214 nm; t<sub>R</sub> = 8.099 (minor), 9.871 (major) min]; [α]<sub>D</sub><sup>20</sup> = -5.18 (c 1.0, CHCl<sub>3</sub>). IR (film, cm<sup>-1</sup>): 3153, 3080, 2968, 2872, 2360, 2341, 1634, 1486, 1399, 1423, 1073, 1010, 987, 917, 860, 816, 776, 730, 599, 515. <sup>1</sup>H NMR (400 MHz, CDCl<sub>3</sub>) δ 7.40 – 7.27 (m, 7H), 7.25 (d, *J* = 3.0 Hz, 1H), 6.41 – 6.33 (m, 1H), 6.29 (dd, *J* = 15.6, 8.3 Hz, 1H), 5.82 (tt, *J* = 10.0, 7.1 Hz, 1H), 5.11 (dd, *J* = 25.1, 13.5 Hz, 2H), 4.54 (d, *J* = 8.2 Hz, 1H), 3.07 (ddd, *J* = 20.3, 13.8, 6.7 Hz, 2H). <sup>13</sup>C NMR (101 MHz, CDCl<sub>3</sub>) δ 138.81 (s), 134.92 (s), 134.20 (s), 133.51 (s), 133.23 (s), 130.41 (s), 129.64 (s), 129.42 (s), 128.87 (d, *J* = 10.4 Hz), 127.71 (s), 117.59 (s), 50.19 (s), 34.63 (s). HRMS (ESI) calcd for C<sub>18</sub>H<sub>15</sub>Cl<sub>2</sub>S (M<sup>-</sup>): 333.0277, Found: 333.0301.

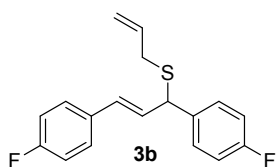

**(E)-Allyl(1,3-bis(4-fluorophenyl)allyl)sulfane (3b):** Colorless oil; 67% yield; 94% ee. The ee of the product was determined by HPLC [Daicel CHIRALPAK OJ-H (0.46 cm\*25 cm); hexane/2-propanol = 95/5; flow rate = 1.0 mL/min; detection wavelength = 214 nm; t<sub>R</sub> = 10.193 (minor), 14.623 (major) min]; [α]<sub>D</sub><sup>20</sup> = -10.01 (c 1.0, CHCl<sub>3</sub>). IR (film, cm<sup>-1</sup>): 3128, 2912, 1733, 1619, 1448, 1403, 1282, 1072, 1035, 994, 911, 819, 763, 742, 639, 528. <sup>1</sup>H NMR (400 MHz, CDCl<sub>3</sub>) δ 7.36 (ddd, *J* = 13.9, 8.6, 5.4 Hz, 4H), 7.08 – 6.96 (m, 4H), 6.41 (d, *J* = 15.7 Hz, 1H), 6.25 (dd, *J* = 15.7, 8.5 Hz, 1H), 5.83 (ddt, *J* = 14.2, 9.9, 7.1 Hz, 1H), 5.12 (dd, *J* = 19.1, 13.5 Hz, 2H), 4.55 (d, *J* = 8.5 Hz, 1H), 3.08 (ddd, *J* = 20.5, 13.9, 6.6 Hz, 2H). <sup>13</sup>C NMR (101 MHz, CDCl<sub>3</sub>) δ 163.45 (d, *J* = 43.9 Hz), 162.66 – 159.61 (m), 136.16 (s), 134.28 (s), 132.61 (s), 130.24 (s), 129.57 (d, *J* = 8.1 Hz), 129.04 (s), 128.00 (d, *J* = 8.0 Hz), 117.42 (s), 115.57 (dd, *J* = 21.6, 2.7 Hz), 50.13 (s), 34.61 (s). HRMS (ESI) calcd for C<sub>18</sub>H<sub>15</sub>F<sub>2</sub>S (M<sup>-</sup>): 301.0868, Found: 301.0888.

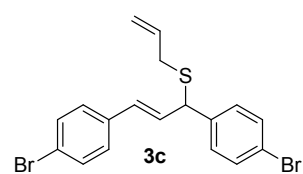

**(E)-Allyl(1,3-bis(4-bromophenyl)allyl)sulfane (3c):** Colorless oil; 78% yield; 95% ee. The ee of the product was determined by HPLC [Daicel CHIRALPAK OJ-H (0.46 cm\*25 cm); hexane/2-propanol = 95/5; flow rate = 1.0 mL/min; detection wavelength = 214 nm; t<sub>R</sub> =

11.765 (minor), 13.617 (major) min];  $[\alpha]_{\text{D}}^{20} = -13.06$  (c 1.0,  $\text{CHCl}_3$ ). IR (film,  $\text{cm}^{-1}$ ): 3098, 2912, 1653, 1509, 1418, 1413, 1252, 1072, 1035, 998, 919, 866, 743, 752, 649, 520.  $^1\text{H}$  NMR (400 MHz,  $\text{CDCl}_3$ )  $\delta$  7.50 (dd,  $J = 17.9, 8.3$  Hz, 2H), 7.37 – 7.25 (m, 2H), 6.42 (d,  $J = 15.7$  Hz, 1H), 6.37 (d,  $J = 7.8$  Hz, 1H), 6.10 – 5.59 (m, 1H), 5.16 (dd,  $J = 29.8, 13.5$  Hz, 1H), 4.57 (d,  $J = 7.8$  Hz, 1H), 3.13 (dd,  $J = 25.0, 7.1$  Hz, 1H).  $^{13}\text{C}$  NMR (101 MHz,  $\text{CDCl}_3$ )  $\delta$  164.24 (d,  $J = 11.4$  Hz), 161.80 (d,  $J = 12.3$  Hz), 142.71 (d,  $J = 7.0$  Hz), 138.68 (d,  $J = 7.7$  Hz), 134.14 (s), 130.56 (d,  $J = 2.5$  Hz), 130.16 (s), 123.71 (d,  $J = 2.8$  Hz), 122.42 (d,  $J = 2.7$  Hz), 117.72 (s), 115.65 – 114.37 (m), 112.98 (d,  $J = 21.8$  Hz), 50.19 (s), 34.61 (s). HRMS (ESI) calcd for  $\text{C}_{18}\text{H}_{15}\text{Br}_2\text{S}$  ( $\text{M}^-$ ): 420.9267, Found: 420.9266.

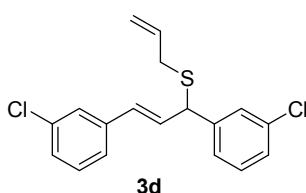

**(E)-Allyl(1,3-bis(3-chlorophenyl)allyl)sulfane (3d):** Colorless oil; 72% yield; 92% ee. The ee of the product was determined by HPLC [Daicel CHIRALPAK OJ-H (0.46 cm\*25 cm); hexane/2-propanol = 95/5; flow rate = 1.0 mL/min; detection wavelength = 214 nm;  $t_{\text{R}} = 7.122$  (minor), 7.834 (major) min];  $[\alpha]_{\text{D}}^{20} = -13.373$  (c

1.0,  $\text{CHCl}_3$ ). IR (film,  $\text{cm}^{-1}$ ): 3240, 2929, 2862, 1623, 1499, 1448, 1413, 1222, 1092, 1014, 996, 927, 809, 762, 742, 619, 525.  $^1\text{H}$  NMR (400 MHz,  $\text{CDCl}_3$ )  $\delta$  7.29 (ddd,  $J = 27.2, 16.8, 8.6$  Hz, 1H), 6.40 (d,  $J = 15.7$  Hz, 1H), 6.33 (dd,  $J = 15.7, 7.9$  Hz, 1H), 5.99 – 5.63 (m, 1H), 5.13 (dd,  $J = 26.7, 13.4$  Hz, 1H), 4.53 (d,  $J = 7.9$  Hz, 1H), 3.25 – 2.93 (m, 1H).  $^{13}\text{C}$  NMR (101 MHz,  $\text{CDCl}_3$ )  $\delta$  163.64 (s), 163.21 (s), 161.19 (s), 160.77 (s), 136.09 (d,  $J = 3.2$  Hz), 134.28 (s), 132.57 (d,  $J = 3.3$  Hz), 130.23 (s), 129.58 (d,  $J = 8.1$  Hz), 128.95 (s), 128.02 (d,  $J = 8.0$  Hz), 117.53 (s), 115.61 (dd,  $J = 21.5, 4.0$  Hz), 50.05 (s), 50.05 (s), 34.63 (s), 34.63 (s), 1.11 (s). HRMS (ESI) calcd for  $\text{C}_{18}\text{H}_{15}\text{Cl}_2\text{S}$  ( $\text{M}^-$ ): 333.0277, Found: 333.0306.

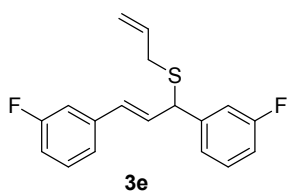

**(E)-Allyl(1,3-bis(3-fluorophenyl)allyl)sulfane (3e):** Colorless oil; 61% yield; 94% ee. The ee of the product was determined by HPLC [Daicel CHIRALPAK OJ-H (0.46 cm\*25 cm); hexane/2-propanol = 95/5; flow rate = 1.0 mL/min; detection wavelength = 214 nm;  $t_{\text{R}} = 6.715$  (minor), 7.254 (major) min];  $[\alpha]_{\text{D}}^{20} = -44.56$  (c

1.0,  $\text{CHCl}_3$ ). IR (film,  $\text{cm}^{-1}$ ): 3018, 2892, 1734, 1599, 1438, 1413, 1292, 1372, 1015, 984, 901, 809, 753, 742, 629, 518.  $^1\text{H}$  NMR (400 MHz,  $\text{CDCl}_3$ )  $\delta$  7.47 – 6.79 (m, 1H), 6.43 (d,  $J = 15.7$  Hz, 1H), 6.34 (dd,  $J = 15.7, 8.3$  Hz, 1H), 5.83 (ddt,  $J = 17.0, 9.9, 7.1$  Hz, 1H), 5.13 (dd,  $J = 23.7, 13.4$  Hz, 1H), 4.56 (d,  $J = 8.3$  Hz, 1H), 3.11 (dd,  $J = 20.6, 7.1$  Hz, 1H).  $^{13}\text{C}$  NMR (101 MHz,  $\text{CDCl}_3$ )  $\delta$  164.26 (d,  $J = 11.6$  Hz), 161.81 (d,  $J = 12.5$  Hz), 142.75 (d,  $J = 7.0$  Hz), 138.72 (d,  $J = 7.7$  Hz), 134.14 (s), 130.57 (d,  $J = 2.5$  Hz), 130.18 (dd,  $J = 14.1, 8.4$  Hz), 123.70 (d,  $J = 2.8$  Hz), 122.41 (d,  $J = 2.7$  Hz), 117.66 (s), 115.11 (s), 115.03 – 114.32 (m), 113.09 (s), 112.87 (s), 50.25 (s), 50.25 (s), 34.60 (s), 34.60 (s). HRMS (ESI) calcd for  $\text{C}_{18}\text{H}_{15}\text{F}_2\text{S}$  ( $\text{M}^-$ ): 301.0865, Found: 308.0868.

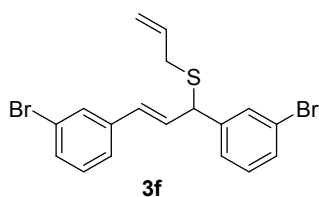

**(E)-Allyl(1,3-bis(3-bromophenyl)allyl)sulfane(3f):** Colorless oil; 81% yield; 94% ee. The ee of the product was determined by HPLC [Daicel CHIRALPAK OJ-H (0.46 cm\*25 cm); hexane/2-propanol = 95/5; flow rate = 1.0 mL/min; detection wavelength = 214 nm;  $t_R$  = 8.734 (minor), 9.424 (major) min];  $[\alpha]^{20}_D = -14.26$  (c 1.0,  $\text{CHCl}_3$ ).

IR (film,  $\text{cm}^{-1}$ ): 3099, 2922, 1663, 1519, 1408, 1400, 1292, 1172, 1135, 993, 909, 856, 733, 702, 649, 530.  $^1\text{H NMR}$  (400 MHz,  $\text{CDCl}_3$ )  $\delta$  7.50 (dd,  $J = 17.9, 8.3$  Hz, 2H), 7.37 – 7.25 (m, 2H), 6.42 (d,  $J = 15.7$  Hz, 1H), 6.37 (d,  $J = 7.8$  Hz, 1H), 6.10 – 5.59 (m, 1H), 5.16 (dd,  $J = 29.8, 13.5$  Hz, 1H), 4.57 (d,  $J = 7.8$  Hz, 1H), 3.13 (dd,  $J = 25.0, 7.1$  Hz, 1H).  $^{13}\text{C NMR}$  (101 MHz,  $\text{CDCl}_3$ )  $\delta$  164.24 (d,  $J = 11.4$  Hz), 161.80 (d,  $J = 12.3$  Hz), 142.71 (d,  $J = 7.0$  Hz), 138.68 (d,  $J = 7.7$  Hz), 134.14 (s), 130.56 (d,  $J = 2.5$  Hz), 130.16 (s), 123.71 (d,  $J = 2.8$  Hz), 122.42 (d,  $J = 2.7$  Hz), 117.72 (s), 115.65 – 114.37 (m), 112.98 (d,  $J = 21.8$  Hz), 50.19 (s), 34.61 (s). HRMS(ESI) calcd for  $\text{C}_{18}\text{H}_{15}\text{F}_2\text{S}$  ( $\text{M}^-$ ): 420.9267, Found: 420.9228.

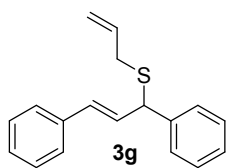

**(E)-Allyl(1,3-bis(phenyl)allyl)sulfane (3g):** Colorless oil; 50% yield; 77% ee. The ee of the product was determined by HPLC [Daicel CHIRALPAK OJ-H (0.46 cm\*25 cm); hexane/2-propanol = 95/5; flow rate = 1.0 mL/min; detection wavelength = 214 nm;  $t_R$  = 10.753 (minor), 14.658 (major) min];  $[\alpha]^{20}_D = -6.21$  (c 1.0,  $\text{CHCl}_3$ ). IR (film,  $\text{cm}^{-1}$ ): 3120, 2930, 2802, 1665, 1639,

1318, 1213, 1152, 1072, 1035, 990, 929, 876, 703, 702, 650, 524.  $^1\text{H NMR}$  (400 MHz,  $\text{CDCl}_3$ )  $\delta$  7.73 – 6.90 (m, 5H), 6.47 (d,  $J = 15.7$  Hz, 1H), 6.38 (dd,  $J = 15.6, 8.4$  Hz, 1H), 5.84 (dq,  $J = 9.6, 7.1$  Hz, 1H), 5.12 (t,  $J = 12.4$  Hz, 1H), 4.58 (d,  $J = 8.4$  Hz, 1H), 3.11 (dd,  $J = 24.5, 7.0$  Hz, 1H).  $^{13}\text{C NMR}$  (101 MHz,  $\text{CDCl}_3$ )  $\delta$  140.49 (s), 136.6 (s), 134.49 (s), 131.30 (s), 129.53 (s), 128.77 (s), 128.65 (s), 128.05 (s), 127.76 (s), 127.48 (s), 126.53 (s), 117.37 (s), 51.08 (s), 34.64 (s). HRMS (ESI) calcd for  $\text{C}_{18}\text{H}_{17}\text{S}$  ( $\text{M}^-$ ): 265.1025, Found: 265.1030.

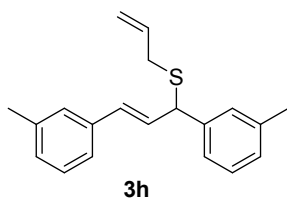

**(E)-Allyl(1,3-di-m-tolylallyl)sulfane (3h):** Colorless oil; 45% yield; 63% ee. The ee of the product was determined by HPLC [Daicel CHIRALPAK OJ-H (0.46 cm\*25 cm); hexane/2-propanol = 95/5; flow rate = 1.0 mL/min; detection wavelength = 214 nm;  $t_R$  = 9.292 (minor), 11.337 (major) min];  $[\alpha]^{20}_D = -9.23$  (c 1.0,  $\text{CHCl}_3$ ). IR (film,

$\text{cm}^{-1}$ ): 3012, 2889, 2622, 1673, 1509, 1438, 1405, 1282, 1162, 1125, 995, 889, 856, 733, 712, 639, 520.  $^1\text{H NMR}$  (400 MHz,  $\text{CDCl}_3$ )  $\delta$  7.37 – 6.87 (m, 1H), 6.44 (d,  $J = 15.7$  Hz, 1H), 6.40 – 6.31 (m, 1H), 5.85 (dq,  $J = 10.0, 7.2$  Hz, 1H), 5.13 (dd,  $J = 13.3, 8.2$  Hz, 1H), 4.68 – 4.30 (m, 1H), 3.36 – 2.88 (m, 1H), 2.56 – 2.17 (m, 1H).  $^{13}\text{C NMR}$  (101 MHz,  $\text{CDCl}_3$ )  $\delta$  140.41 (s), 138.41 (s), 138.18 (s), 136.62 (s), 134.53 (s), 131.22 (s), 129.39 (s), 128.47 (dd,  $J = 20.6, 19.0$  Hz), 128.23 (s),

127.18 (s), 125.04 (s), 123.73 (s), 117.30 (s), 51.10 (s), 34.64 (s), 21.49 (d,  $J = 7.6$  Hz). HRMS(ESI) calcd for  $C_{20}H_{21}S$  (M<sup>-</sup>): 293.1369, Found: 293.1389.

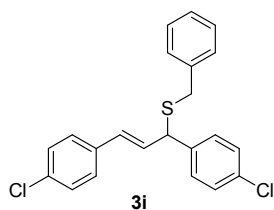

**(E)-Benzyl(1,3-bis(4-chlorophenyl)allyl)sulfane (3i)**: Colorless oil; 71% yield; 95% ee. The ee of the product was determined by HPLC [Daicel CHIRALPAK OJ-H (0.46 cm\*25 cm); hexane/2-propanol = 95/5; flow rate = 1.0 mL/min; detection wavelength = 214 nm;  $t_R = 28.874$  (minor), 34.451 (major) min];  $[\alpha]_D^{20} = -26.36$  (c 1.0,  $CHCl_3$ ). IR (film,  $cm^{-1}$ ): 2978, 2802, 1663, 1489, 1478, 1403, 1212, 1132, 1005, 996, 917, 826, 761, 745, 629, 531.  $^1H$  NMR (400 MHz,  $CDCl_3$ )  $\delta$  7.44 – 7.16 (m, 5H), 6.33 (d,  $J = 9.4$  Hz, 1H), 4.42 (d,  $J = 7.0$  Hz, 1H), 3.66 (d,  $J = 12.4$  Hz, 1H).  $^{13}C$  NMR (101 MHz,  $CDCl_3$ )  $\delta$  138.66 (s), 137.82 (s), 134.87 (s), 133.52 (s), 133.26 (s), 130.51 (s), 129.46 (d,  $J = 10.7$  Hz), 128.85 (dd,  $J = 24.7, 14.8$  Hz), 127.73 (s), 127.19 (s), 50.72 (s), 36.14 (s). HRMS(ESI) calcd for  $C_{19}H_{20}Cl_2S$  (M<sup>-</sup>): 383.0443, Found: 383.0434.

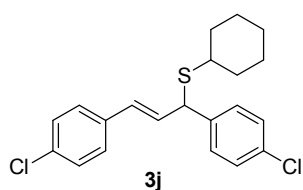

**(E)-(1,3-Bis(4-chlorophenyl)allyl)(cyclohexyl)sulfane (3j)**: Colorless oil; 70% yield; 93% ee. The ee of the product was determined by HPLC [Daicel CHIRALPAK OJ-H (0.46 cm\*25 cm); hexane/2-propanol = 95/5; flow rate = 1.0 mL/min; detection wavelength = 214 nm;  $t_R = 6.957$  (minor), 8.693 (major) min];  $[\alpha]_D^{20} = -21.29$  (c 1.0,  $CHCl_3$ ). IR (film,  $cm^{-1}$ ): 3026, 2928, 2852, 1630, 1604, 1496, 1448, 1384, 1263, 997, 911, 747, 698.  $^1H$  NMR (400 MHz,  $CDCl_3$ )  $\delta$  7.46 – 7.17 (m, 1H), 6.37 (ddd,  $J = 21.5, 14.5, 6.6$  Hz, 1H), 4.68 (d,  $J = 7.9$  Hz, 1H), 2.08 – 1.11 (m, 1H).  $^{13}C$  NMR (101 MHz,  $CDCl_3$ )  $\delta$  139.45 (s), 135.07 (s), 133.40 (s), 133.05 (s), 130.51 (s), 129.57 (s), 129.24 (s), 128.87 (s), 128.79 (s), 127.70 (s), 49.90 (s), 43.35 (s), 33.48 (d,  $J = 10.7$  Hz), 25.82 (s). HRMS(ESI) calcd for  $C_{19}H_{20}Cl_2S$  (M<sup>-</sup>): 375.0749, Found: 375.0747.

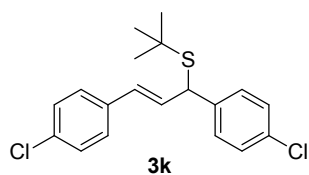

**(E)-Allyl(1,3-di-m-tolylallyl)sulfane (3k)**: Colorless oil; 88% yield; 91% ee. The ee of the product was determined by HPLC [Daicel CHIRALPAK OJ-H (0.46 cm\*25 cm); hexane/2-propanol = 95/5; flow rate = 1.0 mL/min; detection wavelength = 214 nm;  $t_R = 7.632$  (minor), 9.073 (major) min];  $[\alpha]_D^{20} = -10.12$  (c 1.0,  $CHCl_3$ ). IR (film,  $cm^{-1}$ ): 3029, 2872, 1653, 1499, 1458, 1413, 1380, 1372, 1215, 990, 927, 820, 760, 741, 619, 522.

$^1\text{H}$  NMR (400 MHz,  $\text{CDCl}_3$ )  $\delta$  7.38 – 7.23 (m, 8H), 6.46 – 6.22 (m, 2H), 4.71 (d,  $J = 7.1$  Hz, 1H), 1.31 (s, 9H).  $^{13}\text{C}$  NMR (101 MHz,  $\text{CDCl}_3$ )  $\delta$  140.75 (s), 135.21 (s), 133.29 (s), 132.87 (s), 132.16 (s), 129.43 (s), 128.79 (d,  $J = 5.9$  Hz), 127.63 (s), 49.48 (s), 44.93 (s), 31.50 (s). HRMS(ESI) calcd for  $\text{C}_{19}\text{H}_{20}\text{Cl}_2\text{S}$  ( $\text{M}^-$ ): 349.0590, Found: 349.0597.

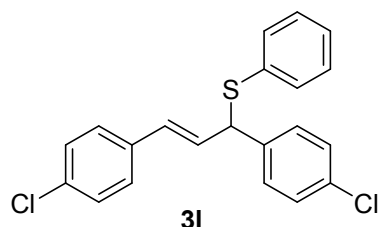

**(E)-(1,3-Bis(4-chlorophenyl)allyl)(phenyl)sulfane (3I):**

Colorless oil; 72% yield; 53% ee. The ee of the product was determined by HPLC [Lux Cellulose-1 (0.46\*25 cm, 5  $\mu$  m)  $\text{CO}_2$ :methanol 97:3 (V/V %) UV 214 nm 1.5 mL/min Back pressure 2000 psi Column Temperature 40  $^\circ\text{C}$ ];  $[\alpha]_{\text{D}}^{20} = -$

16.12 (c 1.0,  $\text{CHCl}_3$ ). IR (film,  $\text{cm}^{-1}$ ): 3823, 3081, 2976, 2911, 2360, 2341, 1634, 1486, 1399, 1423, 1073, 1010, 987, 917, 843, 816, 736, 740, 593, 515.  $^1\text{H}$  NMR (400 MHz,  $\text{CDCl}_3$ )  $\delta$  7.46 – 7.17 (m, 1H), 6.37 (ddd,  $J = 21.5, 14.5, 6.6$  Hz, 1H), 4.68 (d,  $J = 7.9$  Hz, 1H), 2.08 – 1.11 (m, 1H).  $^{13}\text{C}$  NMR (101 MHz,  $\text{CDCl}_3$ )  $\delta$  139.45 (s), 135.07 (s), 133.40 (s), 133.05 (s), 130.51 (s), 129.57 (s), 129.24 (s), 128.87 (s), 128.79 (s), 127.70 (s), 49.90 (s), 43.35 (s), 33.48 (d,  $J = 10.7$  Hz), 25.82 (s). HRMS(ESI) calcd for  $\text{C}_{19}\text{H}_{20}\text{Cl}_2\text{S}$  ( $\text{M}^-$ ): 369.0278, Found: 369.0312.

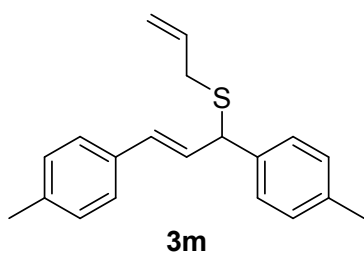

**(E)-Allyl(1,3-di-p-tolylallyl)sulfane (3m):** Colorless oil; 43% yield; 3% ee. The ee of the product **3I** was determined by HPLC [Daicel CHIRALPAK AD-H (0.46 cm\*25 cm); hexane/2-propanol = 95/5; flow rate = 1.0 mL/min; detection wavelength = 214 nm;  $t_{\text{R}} = 6.835$  (minor), 7.334 (major) min]. IR (film,  $\text{cm}^{-1}$ ): 3015, 2883, 2626, 1669, 1513, 1434, 1411, 1276, 1168,

1131, 991, 893, 859, 740, 718, 633, 526.  $^1\text{H}$  NMR (400 MHz,  $\text{CDCl}_3$ )  $\delta$  7.28 (dd,  $J = 11.9, 7.6$  Hz, 4H), 7.11 (dd,  $J = 15.2, 7.6$  Hz, 4H), 6.42 (d,  $J = 15.6$  Hz, 1H), 6.31 (dd,  $J = 15.5, 8.6$  Hz, 1H), 5.82 (dq,  $J = 10.6, 6.9$  Hz, 1H), 5.13 – 5.06 (m, 2H), 4.53 (d,  $J = 8.3$  Hz, 1H), 3.08 (ddd,  $J = 20.2, 13.8, 7.1$  Hz, 2H), 2.30 (s, 6H).  $^{13}\text{C}$  NMR (101 MHz,  $\text{CDCl}_3$ )  $\delta$  137.64, 137.55, 137.11, 134.65, 134.00, 131.07, 129.46, 129.37, 128.72, 127.95, 126.48, 117.25, 50.94, 34.67, 21.31, 21.22. HRMS(ESI) calcd for  $\text{C}_{20}\text{H}_{21}\text{S}$  ( $\text{M}^-$ ): 293.1358, Found: 293.1356.

**References:**

1. L. C. Liang, P. S. Chien, P. Y. Lee, J. M. Lin and Y. L. Huang. *Dalton Trans* **2008**, 3320.
2. a) A. Alexakis, S. Rosset, J. Allamand, S. March, F. Guillen, C. Benhaim. *Synlett* **2001**, 9, 1375; b) R. Naasz, L. A. Arnold, A. J. Minnaard, B. L. Feringa. *Angew. Chem. Int. Ed.*

2001, 40, 927; c) D. Polet, A. Alexakis. *Synthesis* 2004, 15, 2586.

### NMR Spectra of the compounds 3

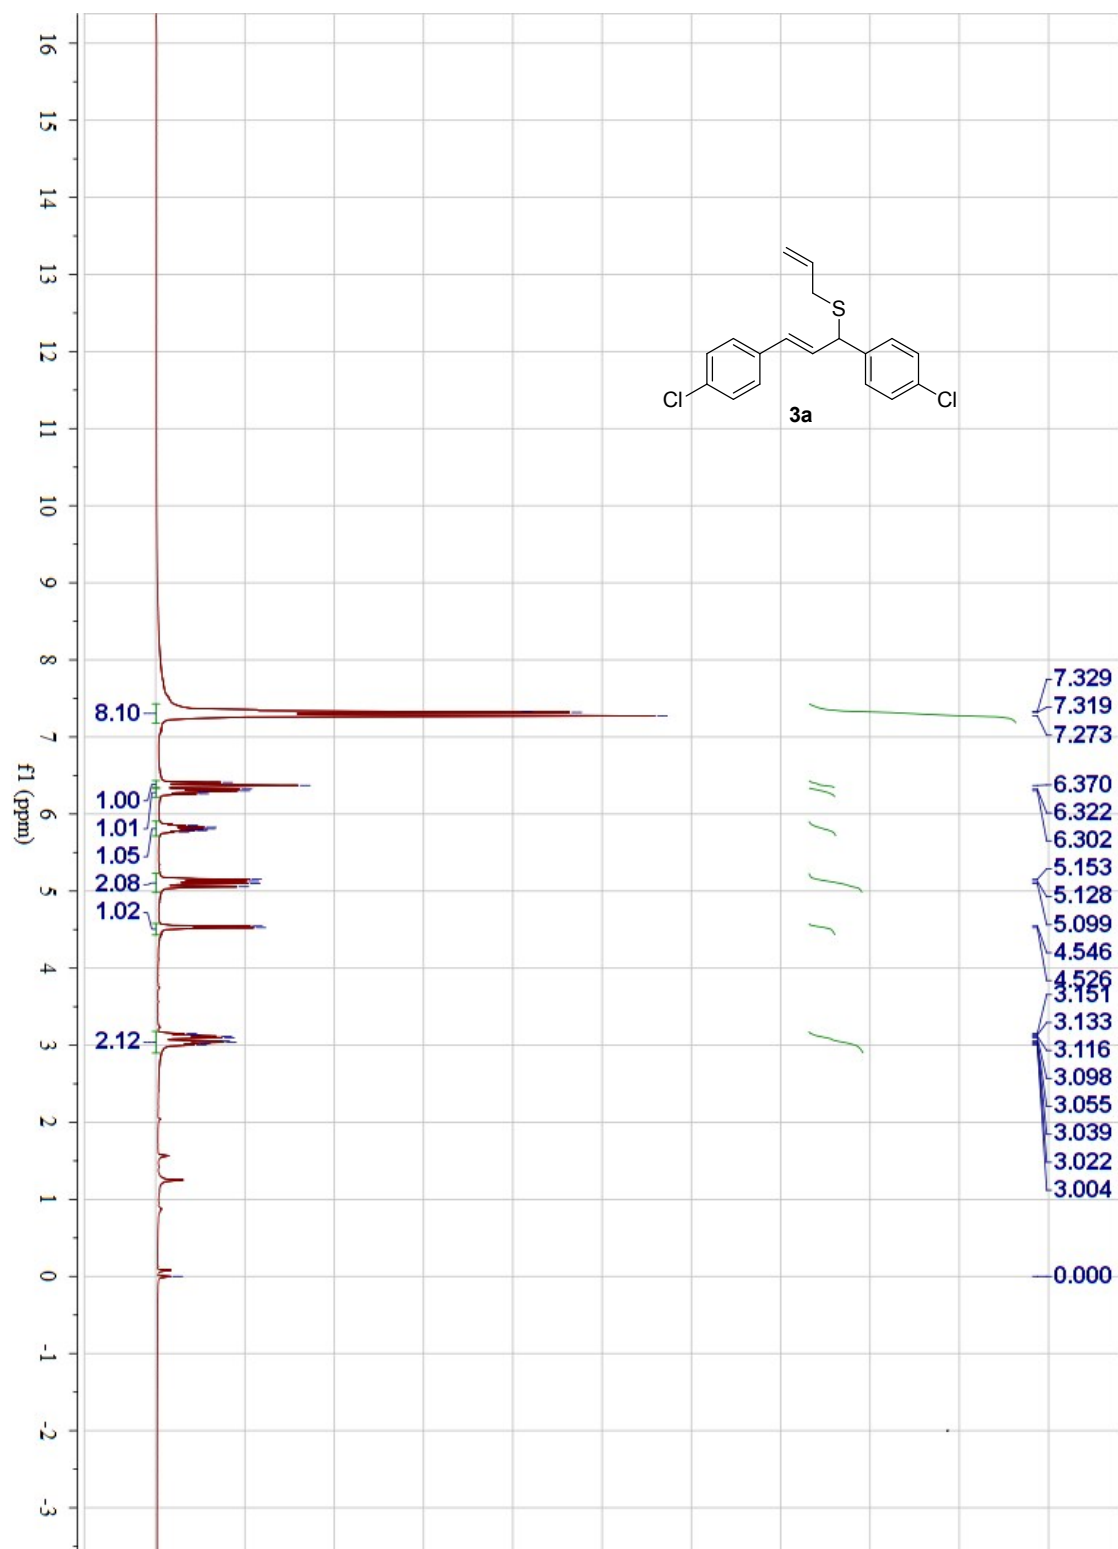

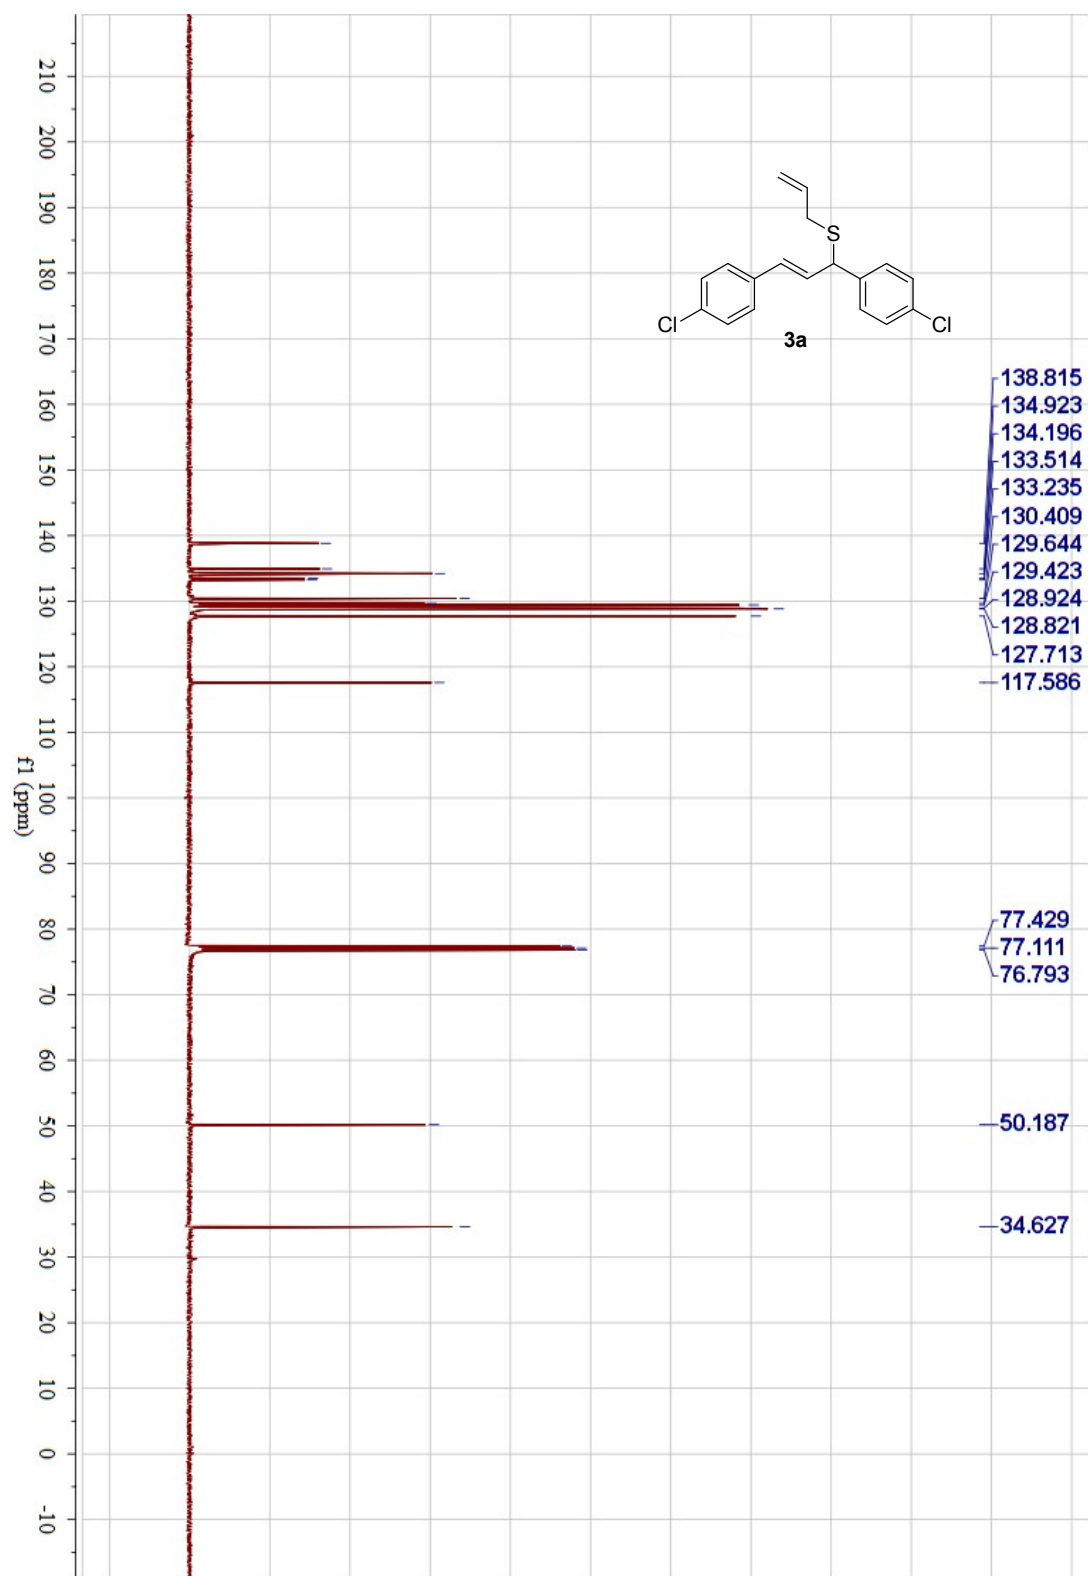



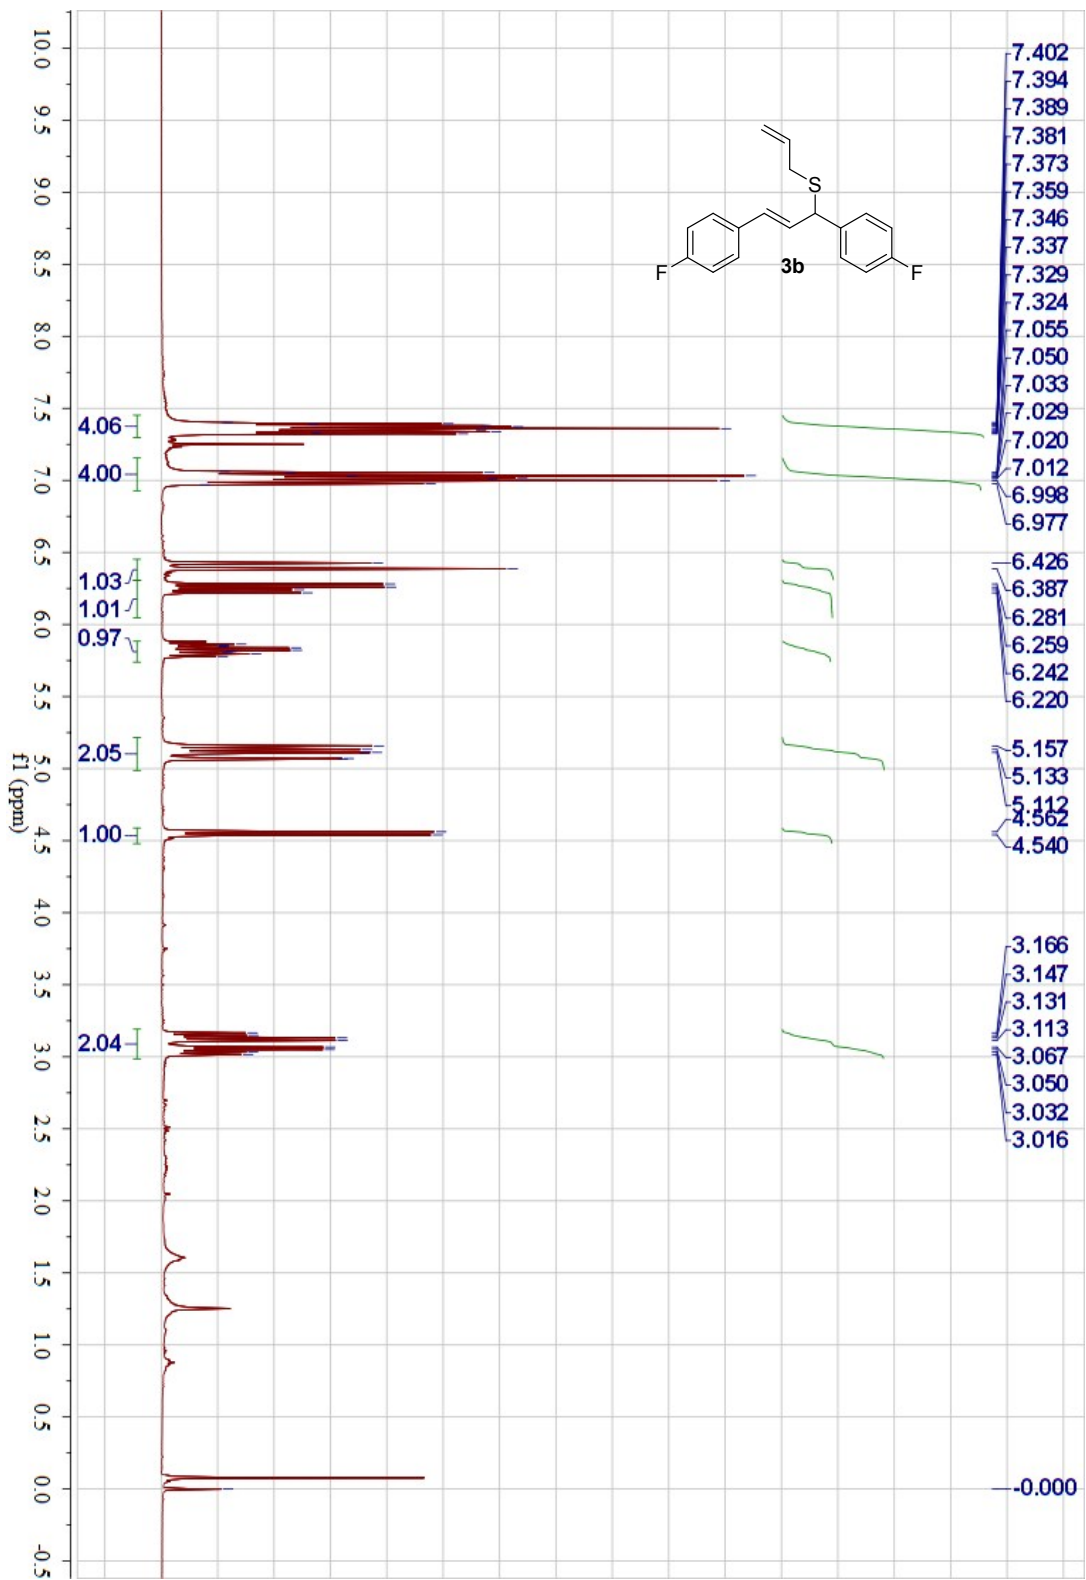

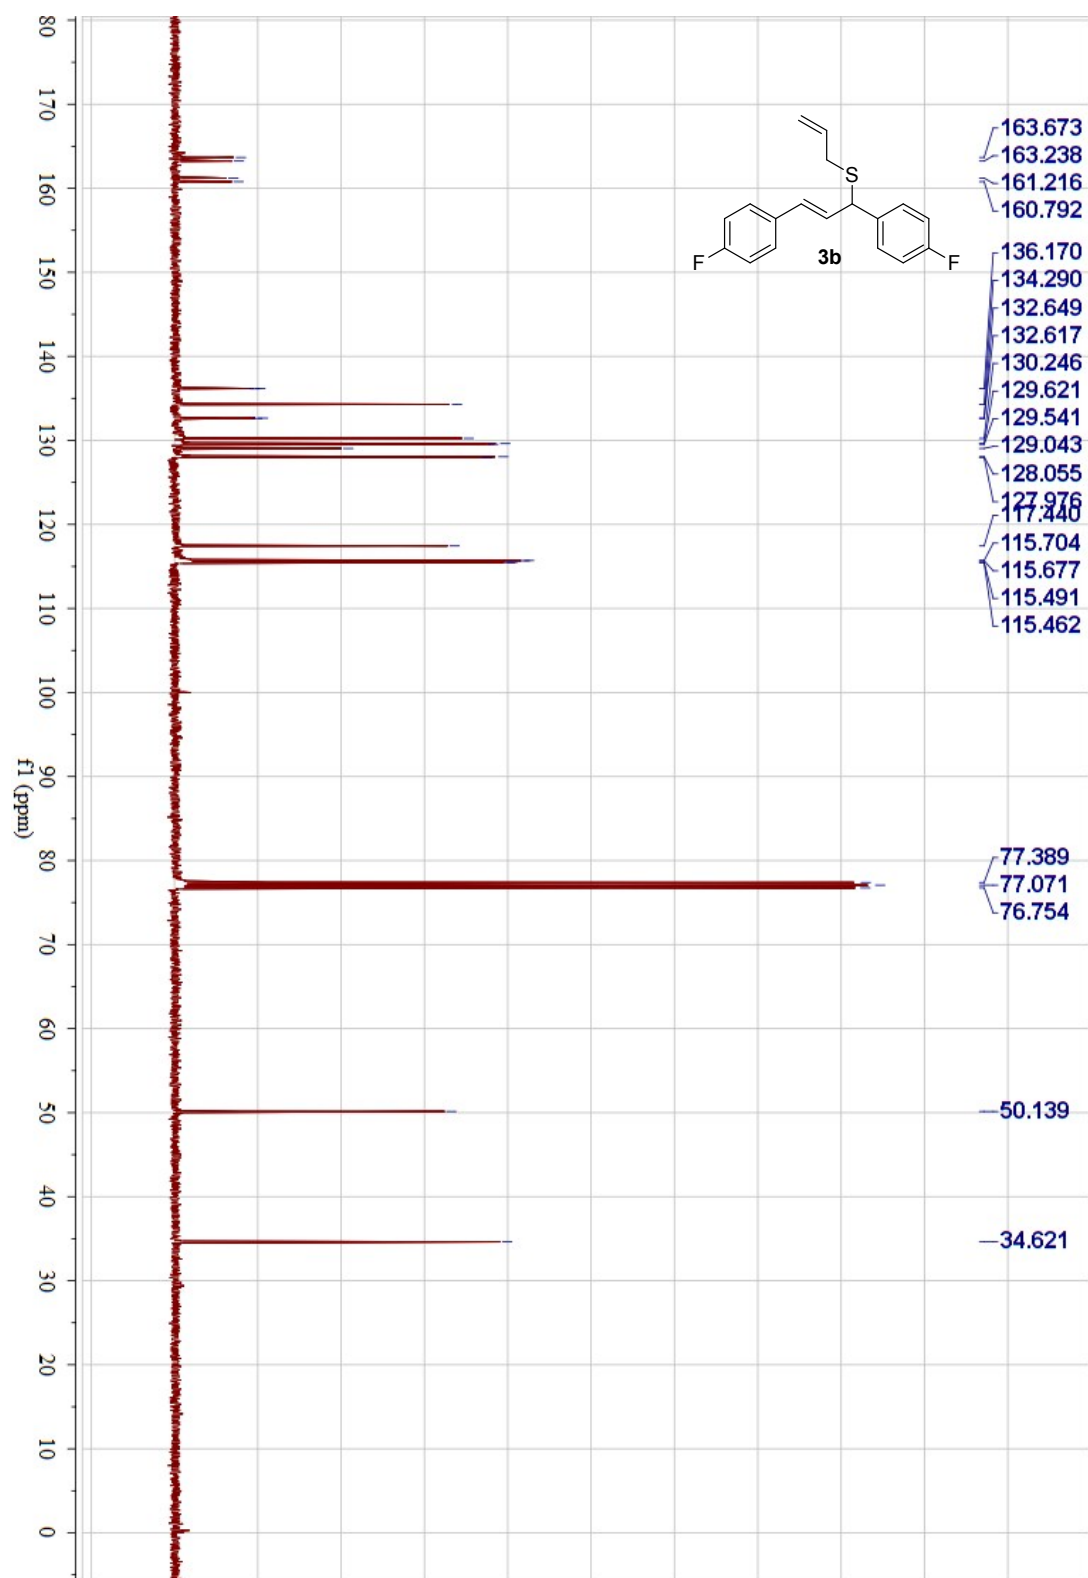

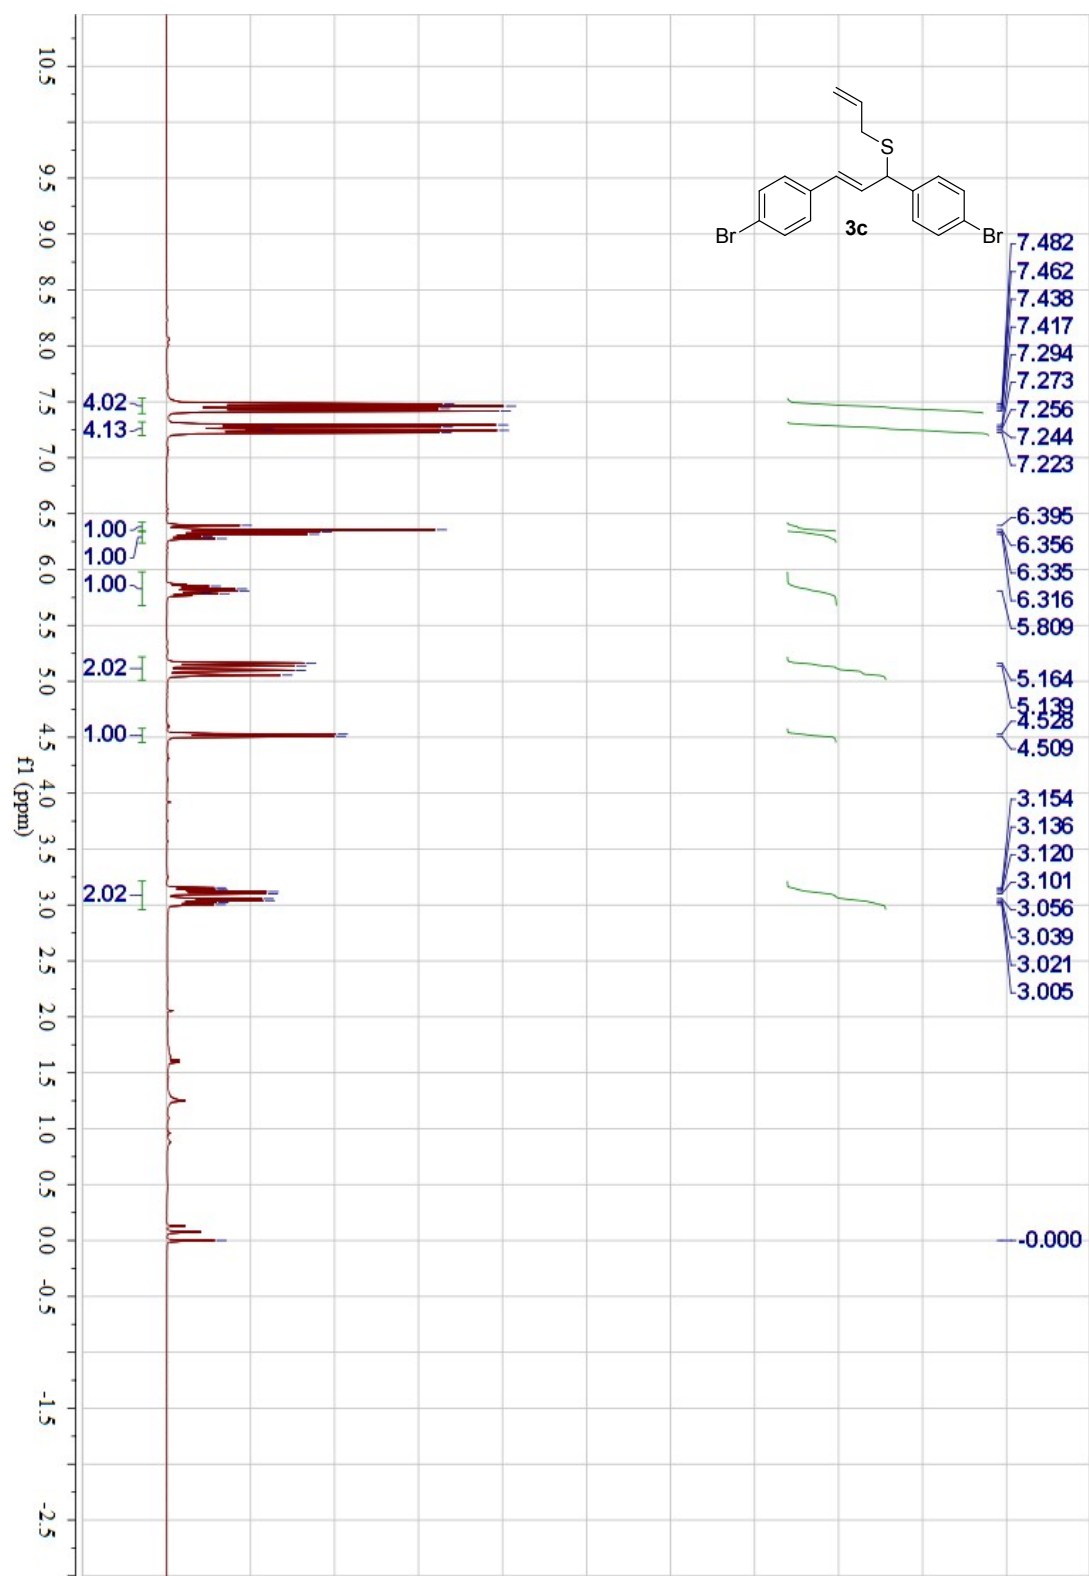

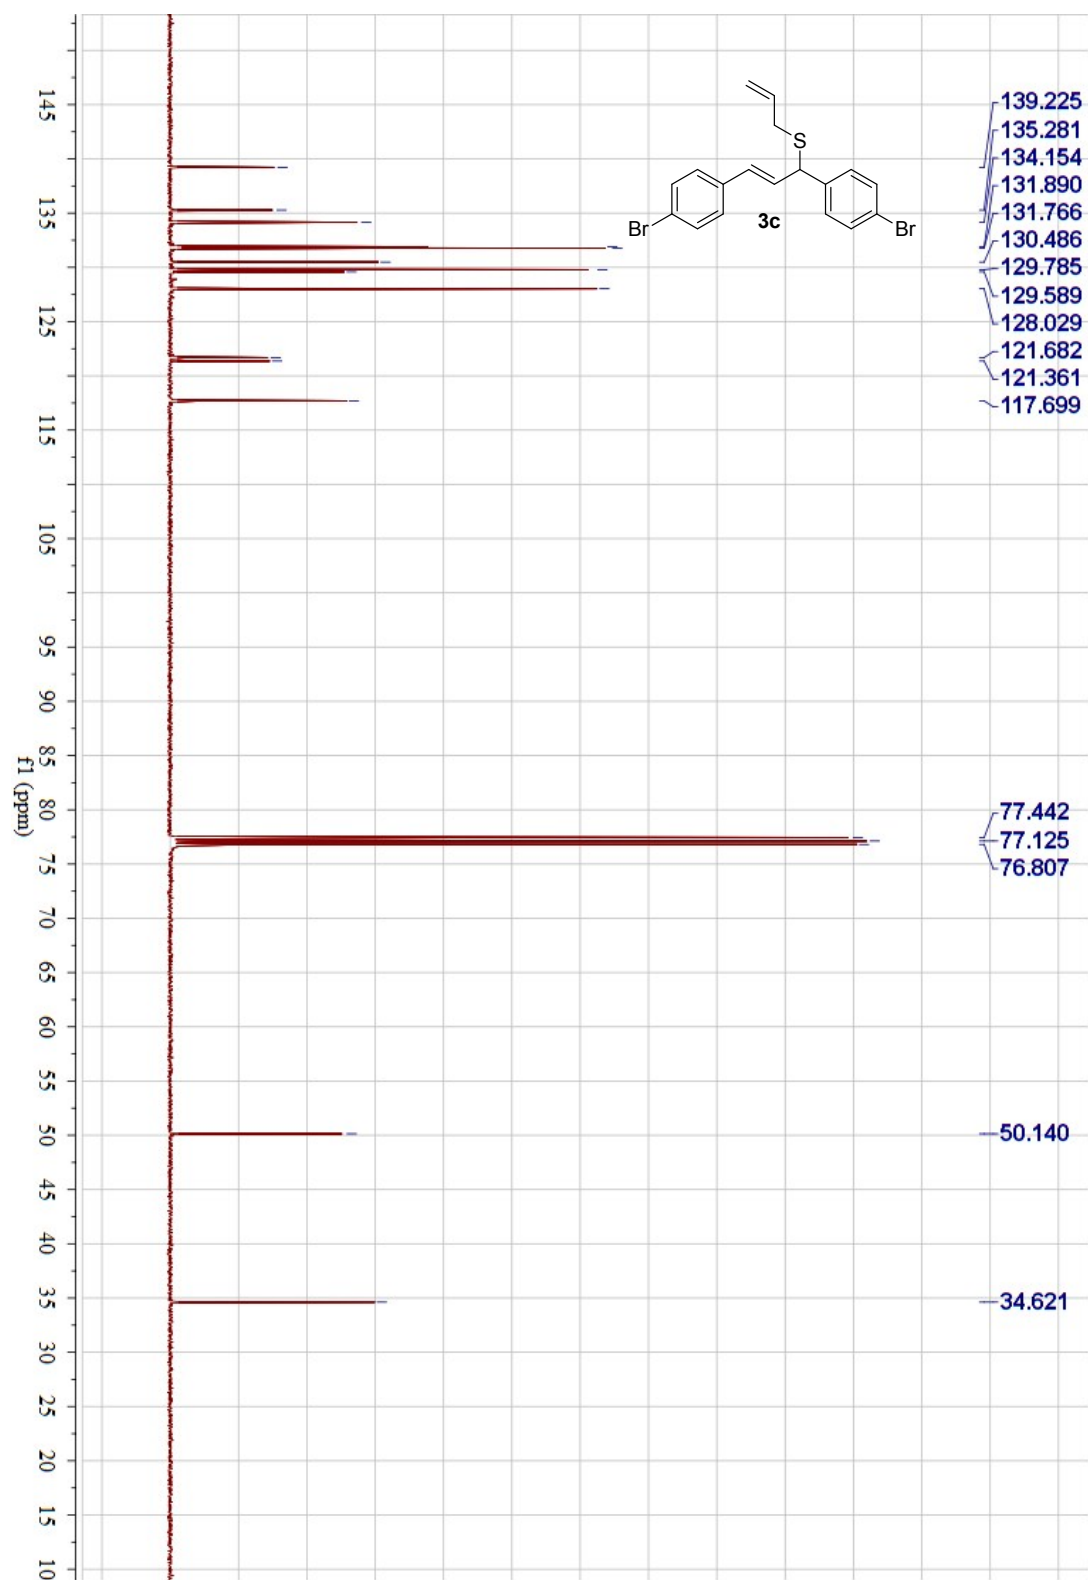

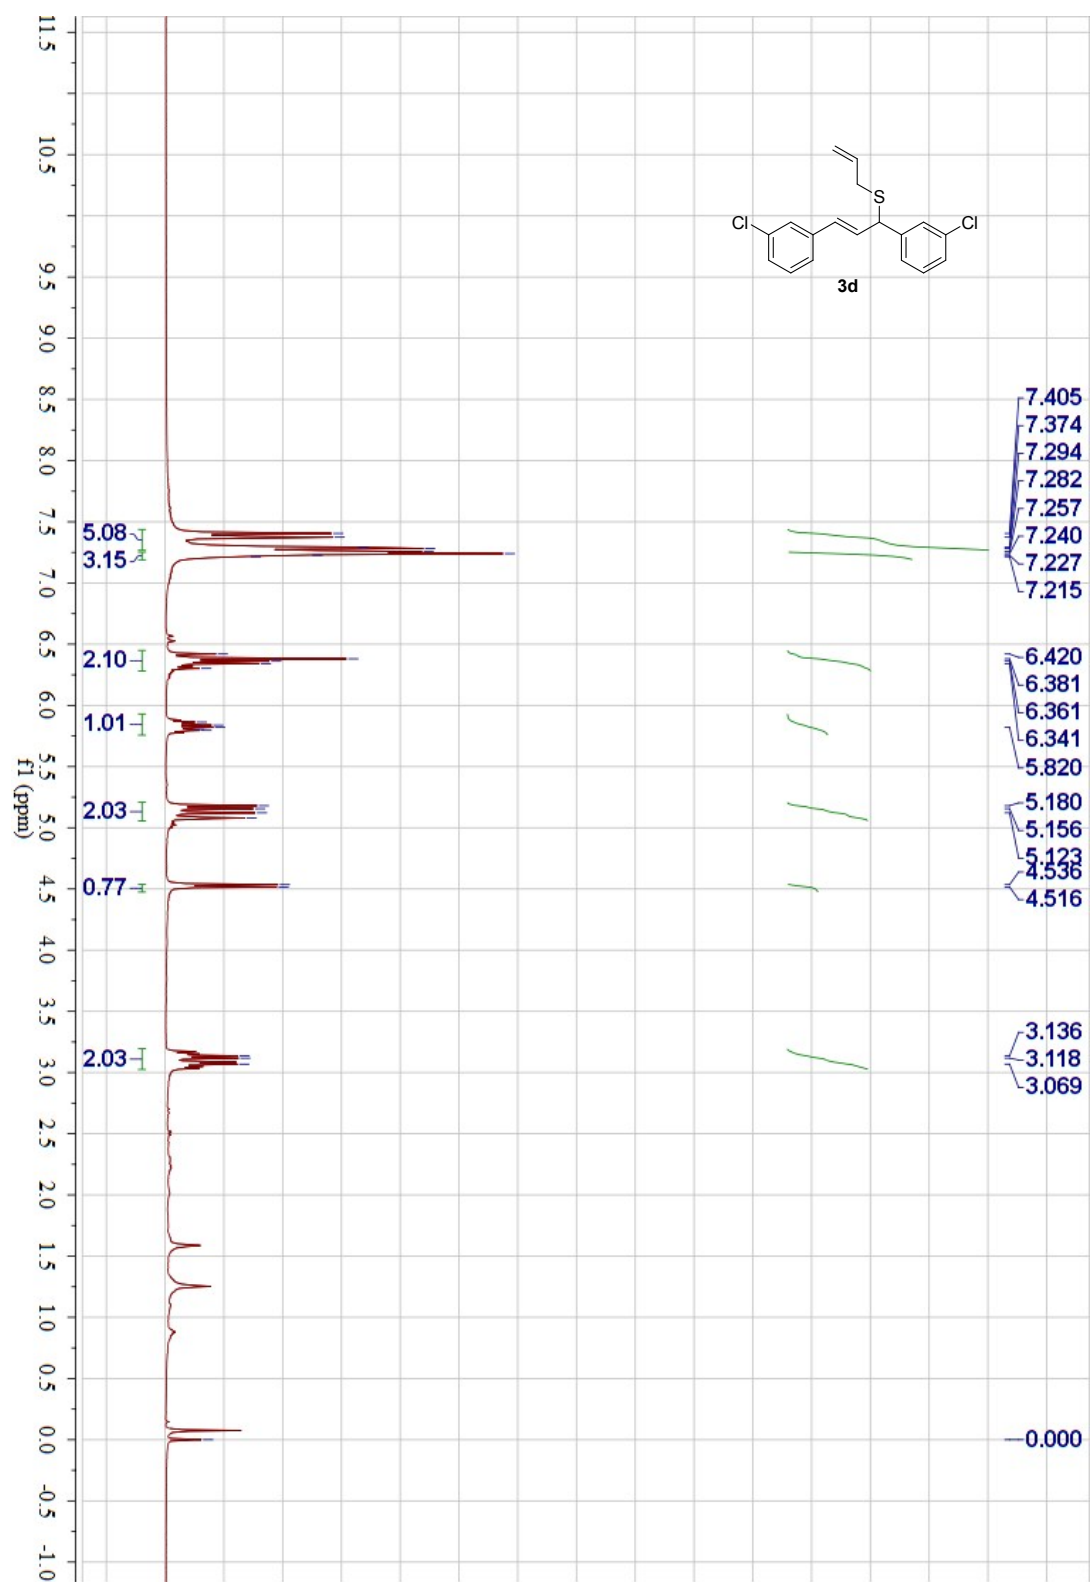

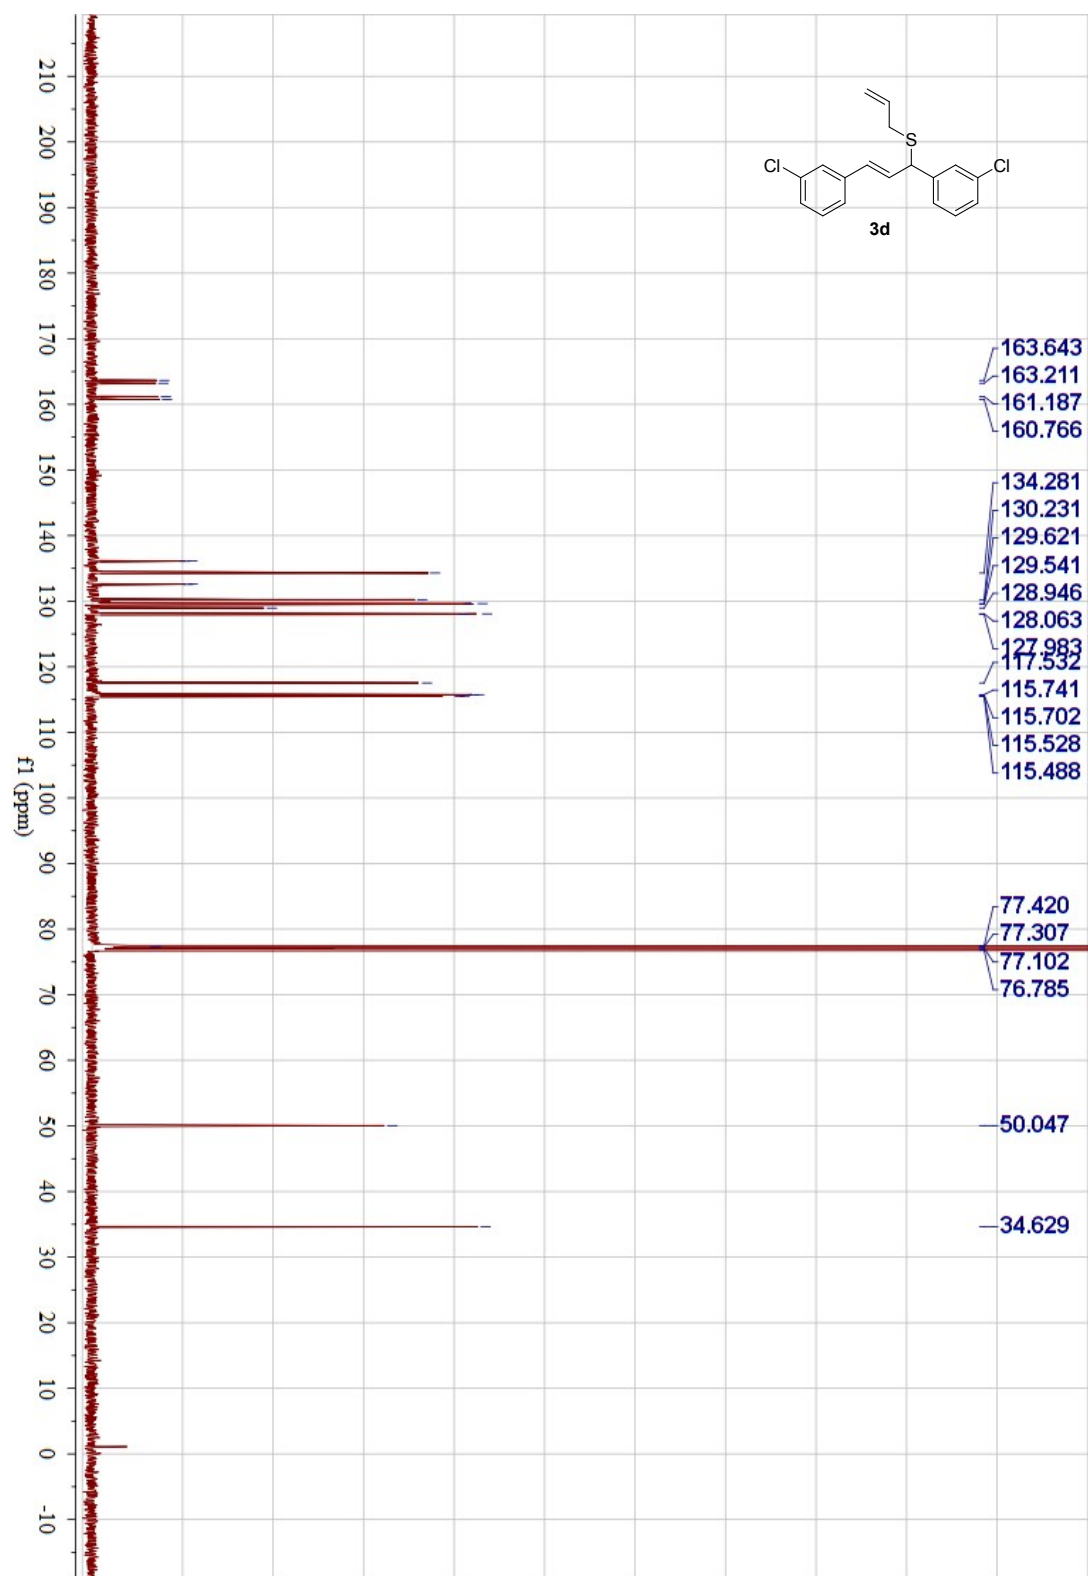

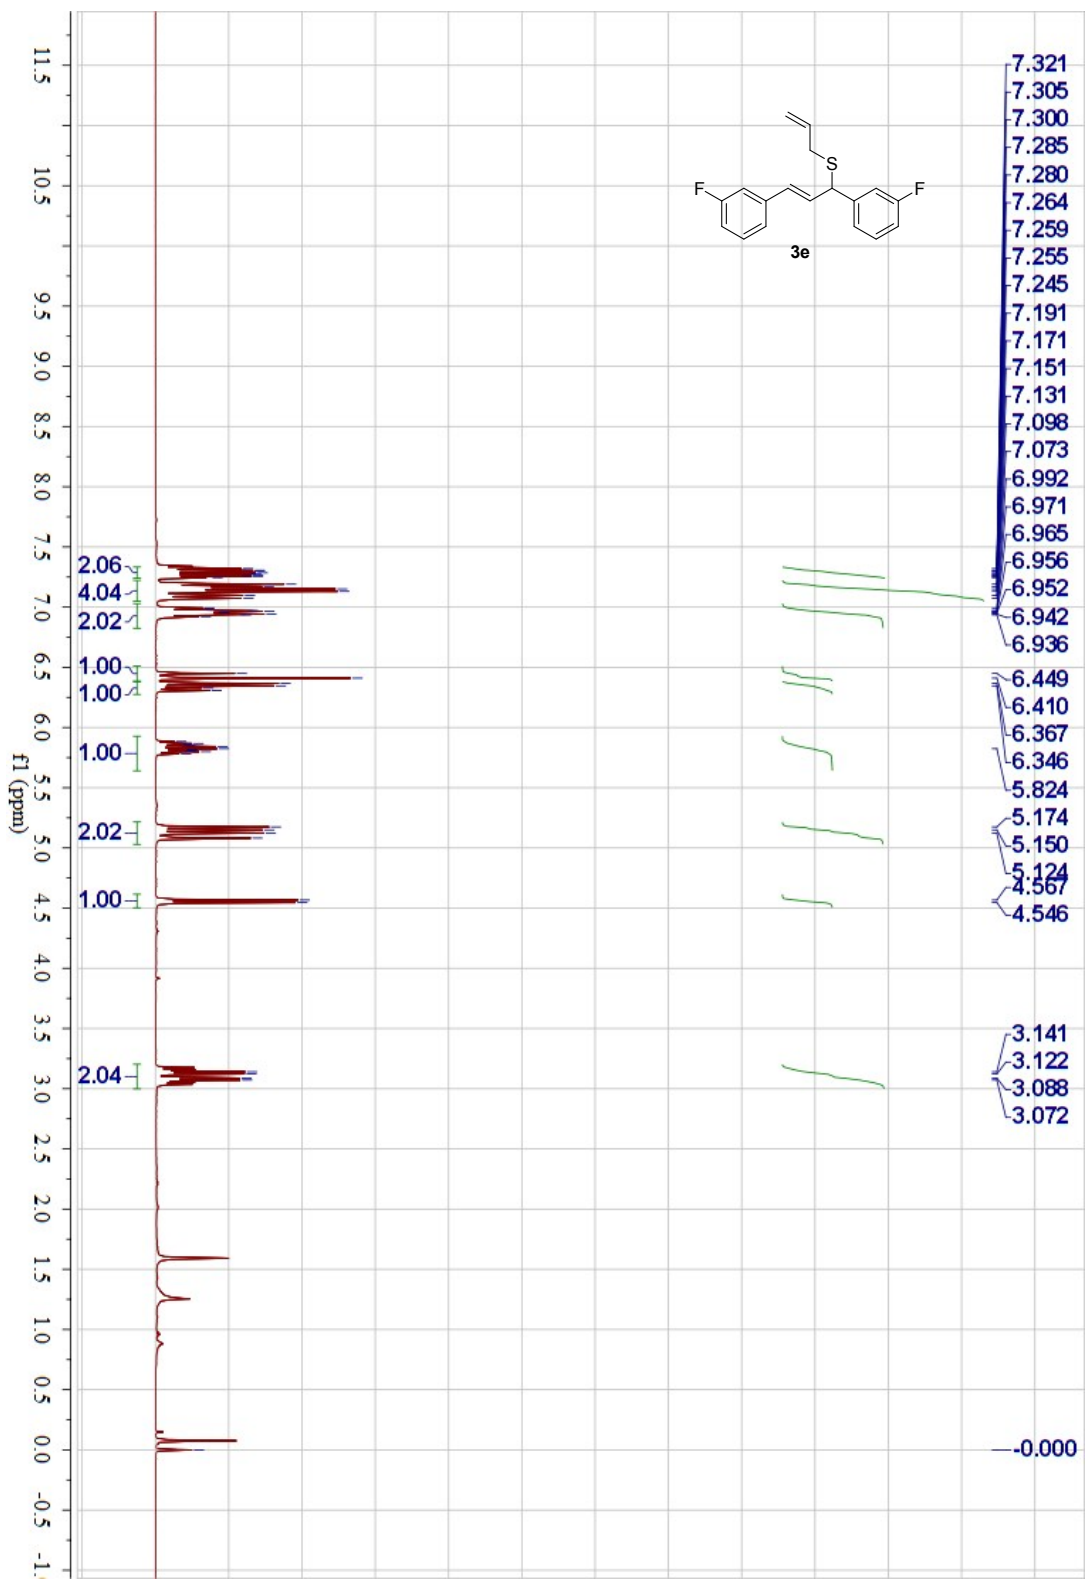

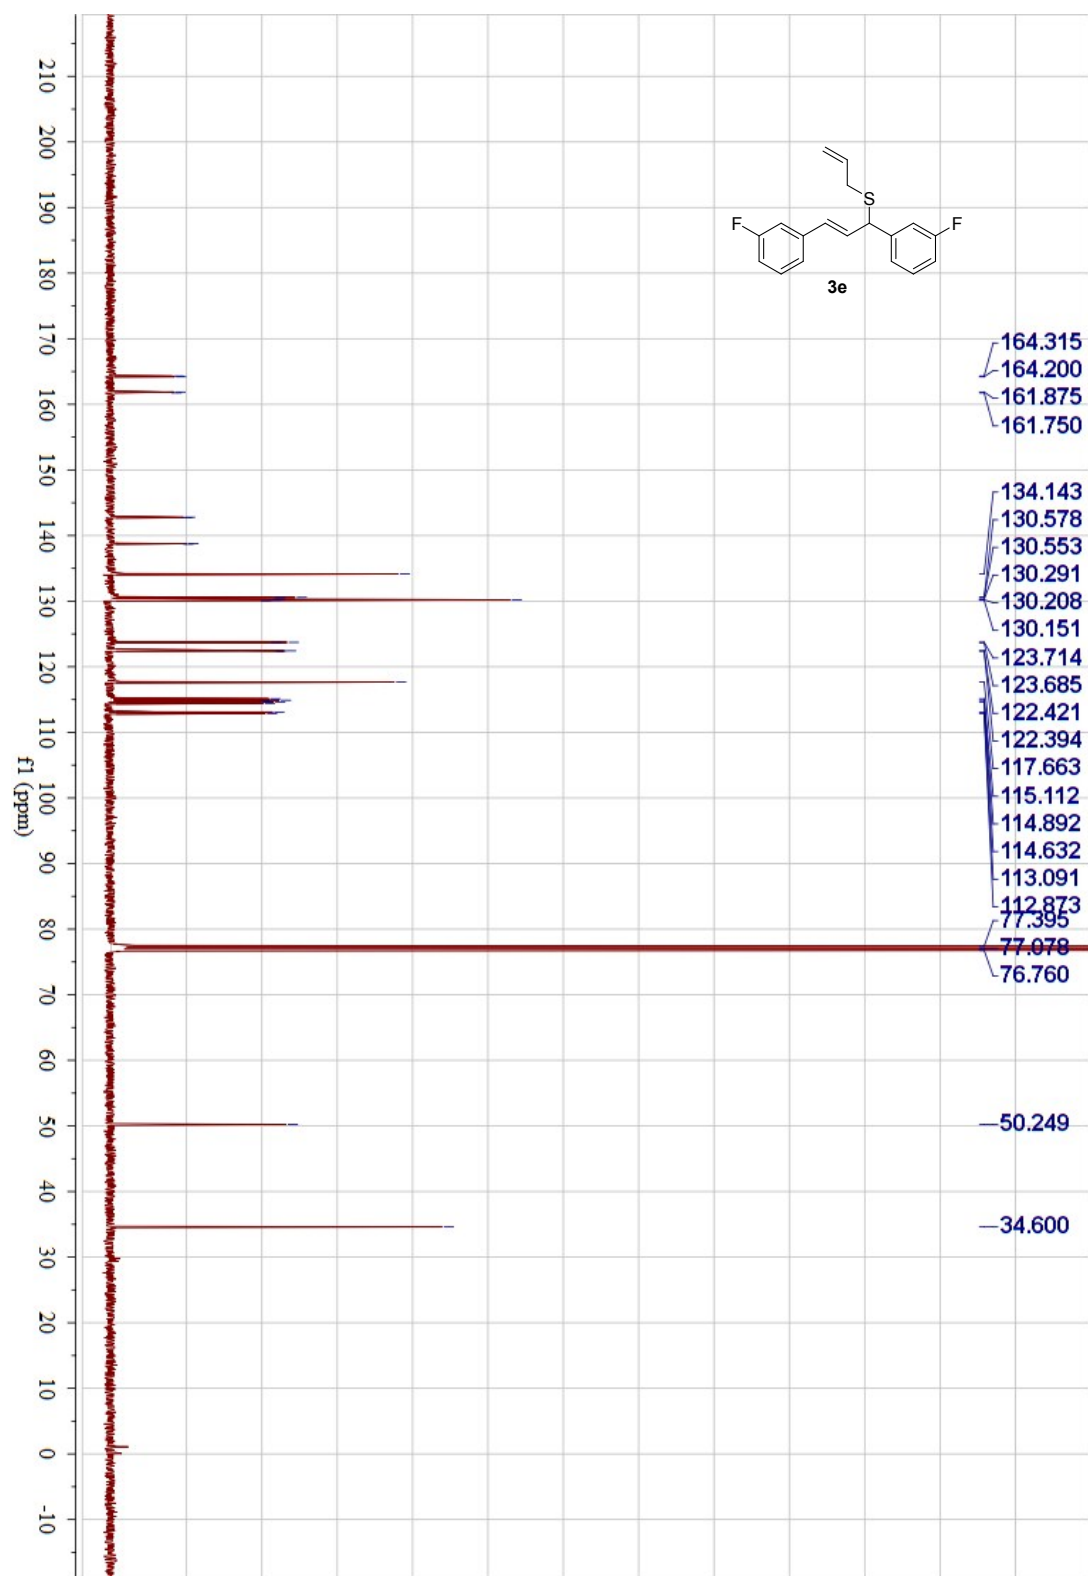



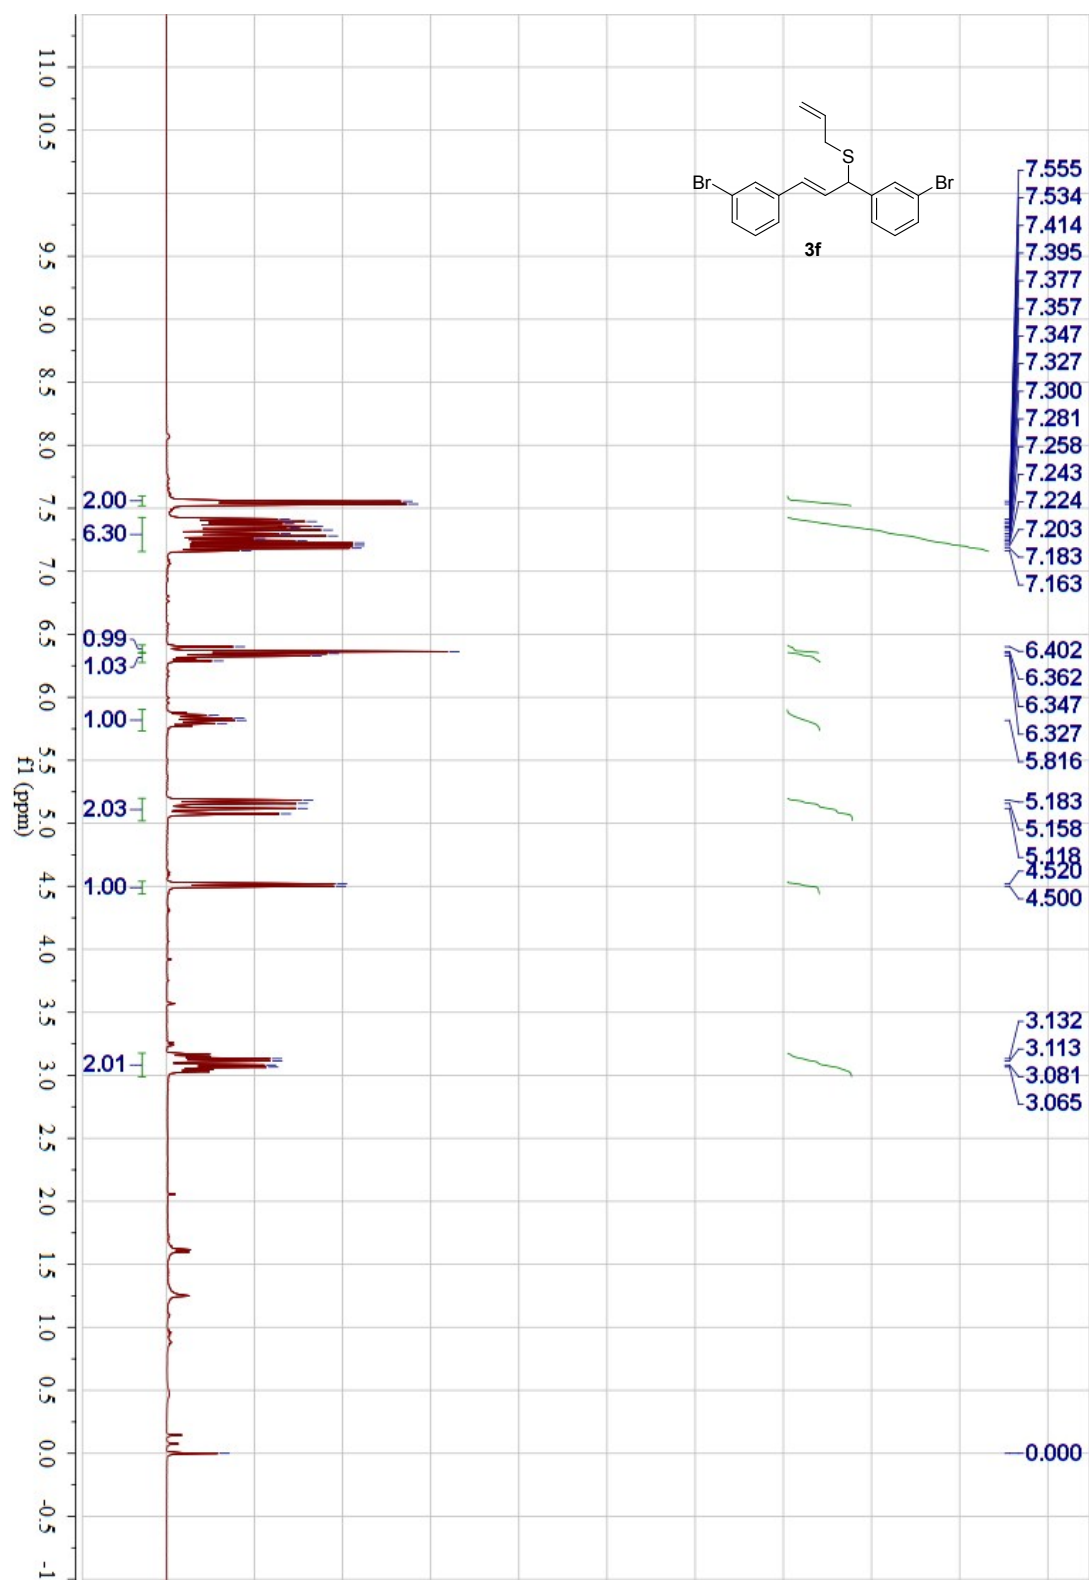

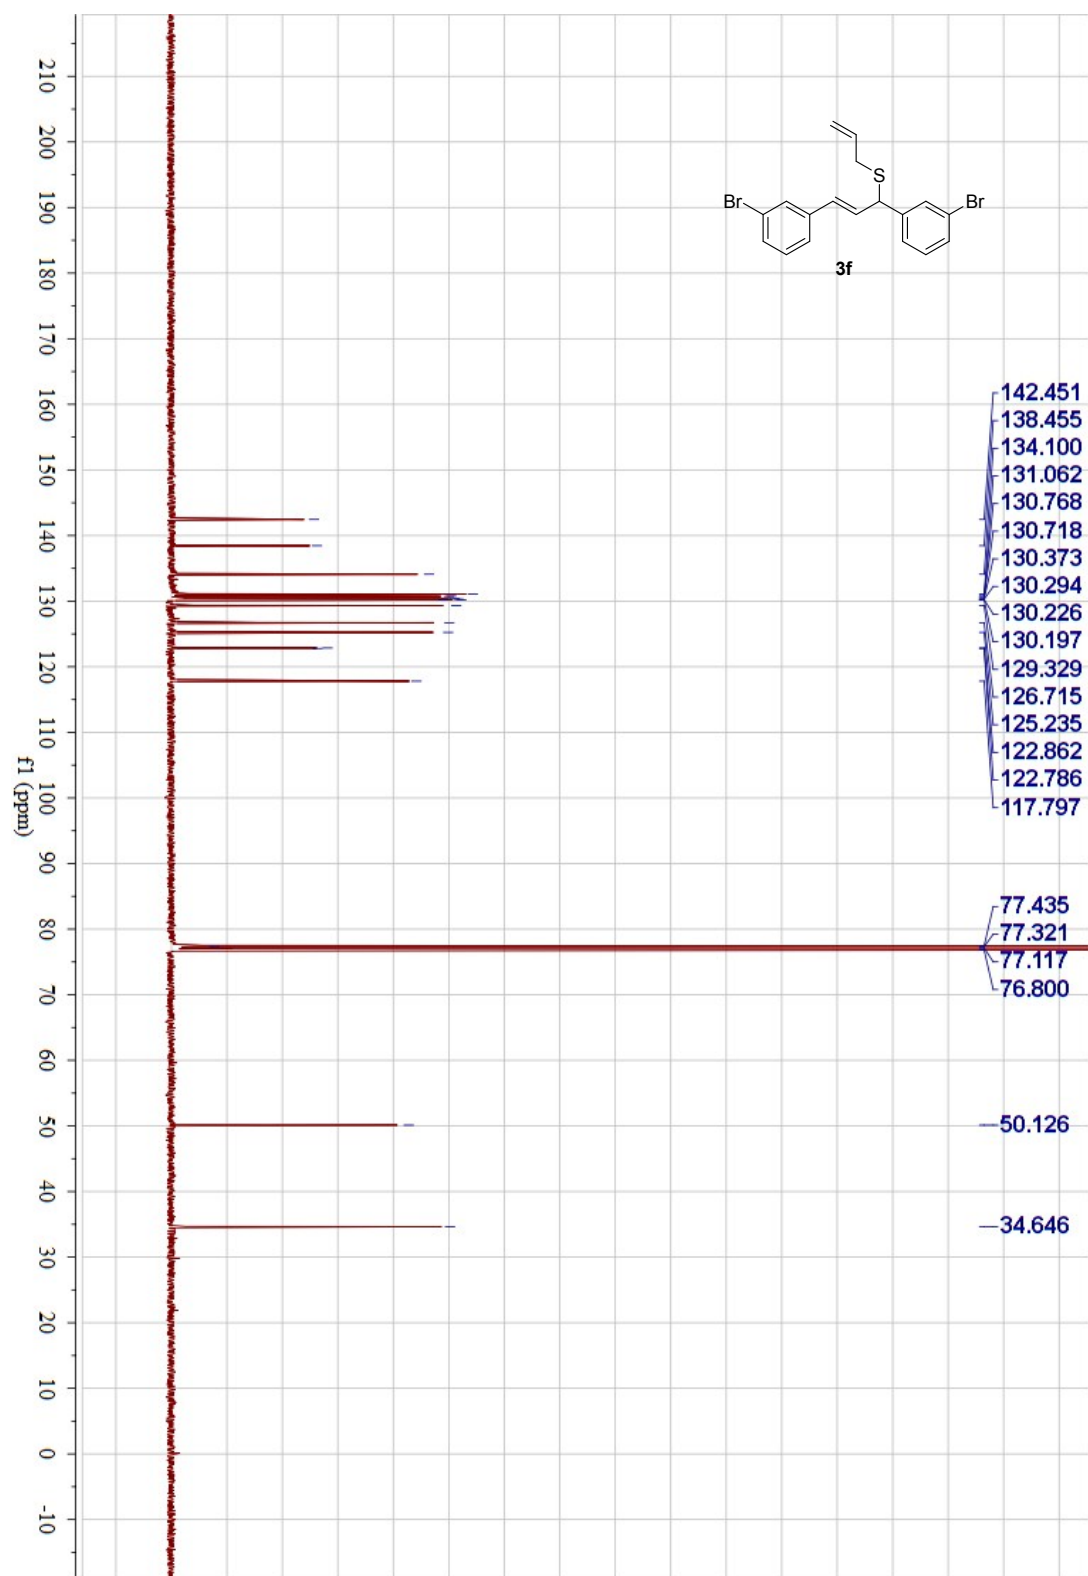

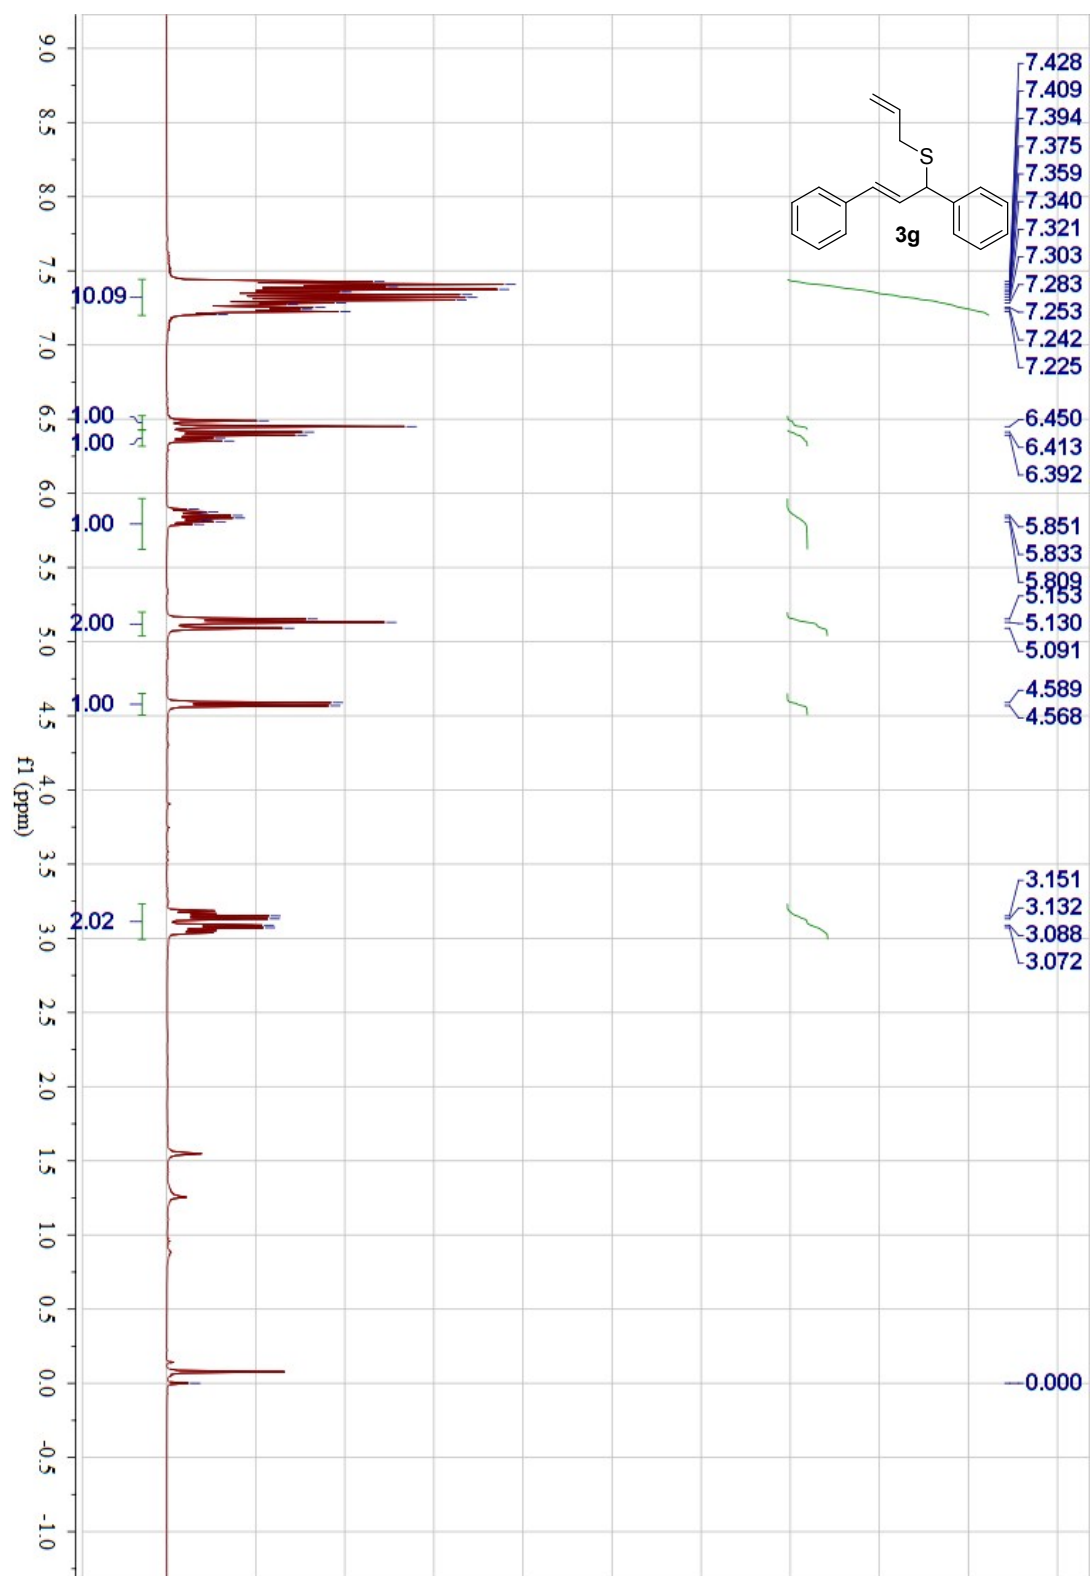

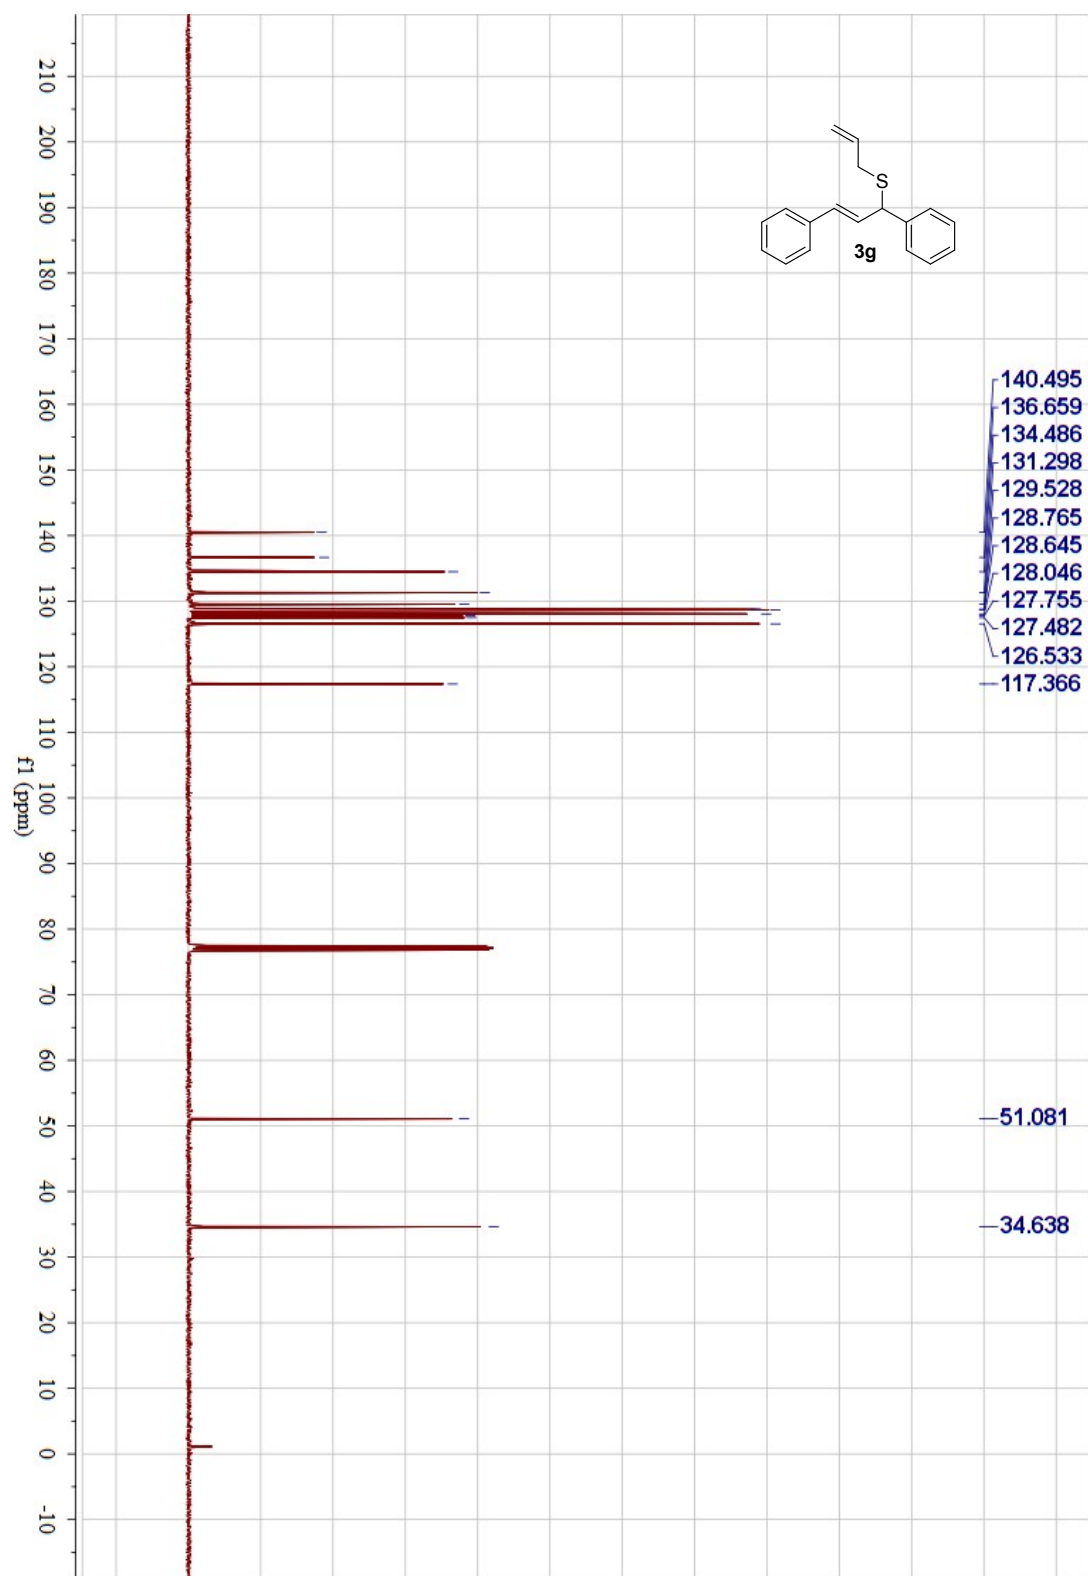

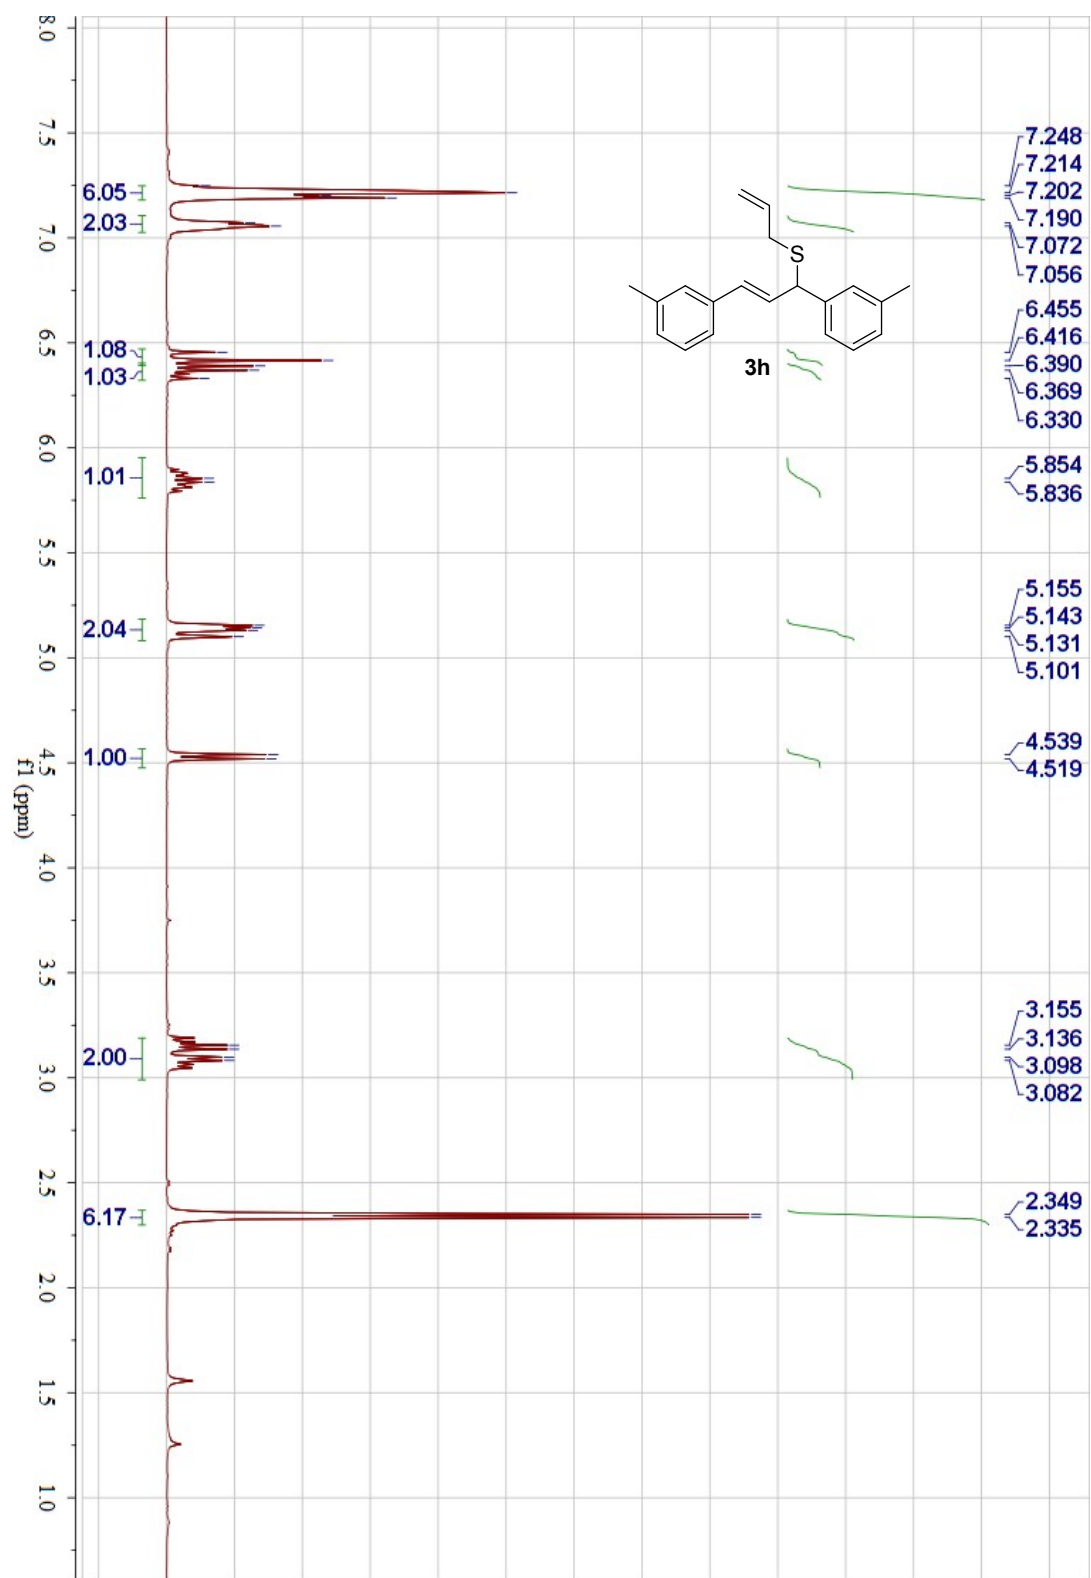

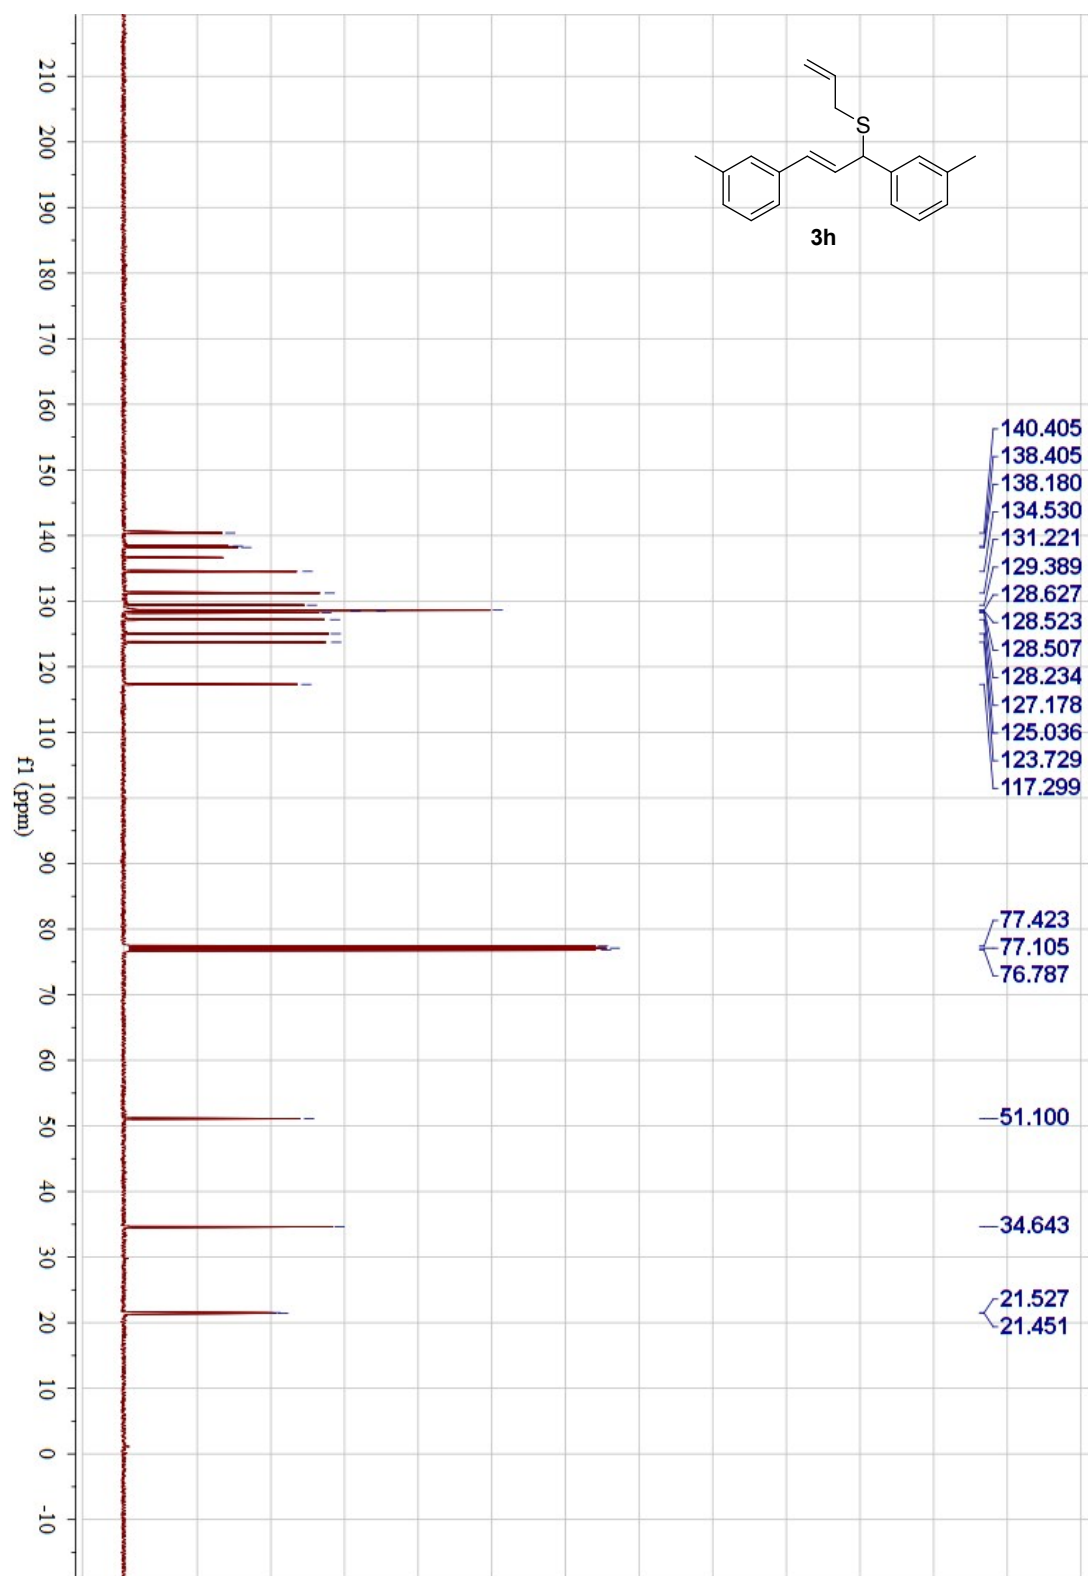

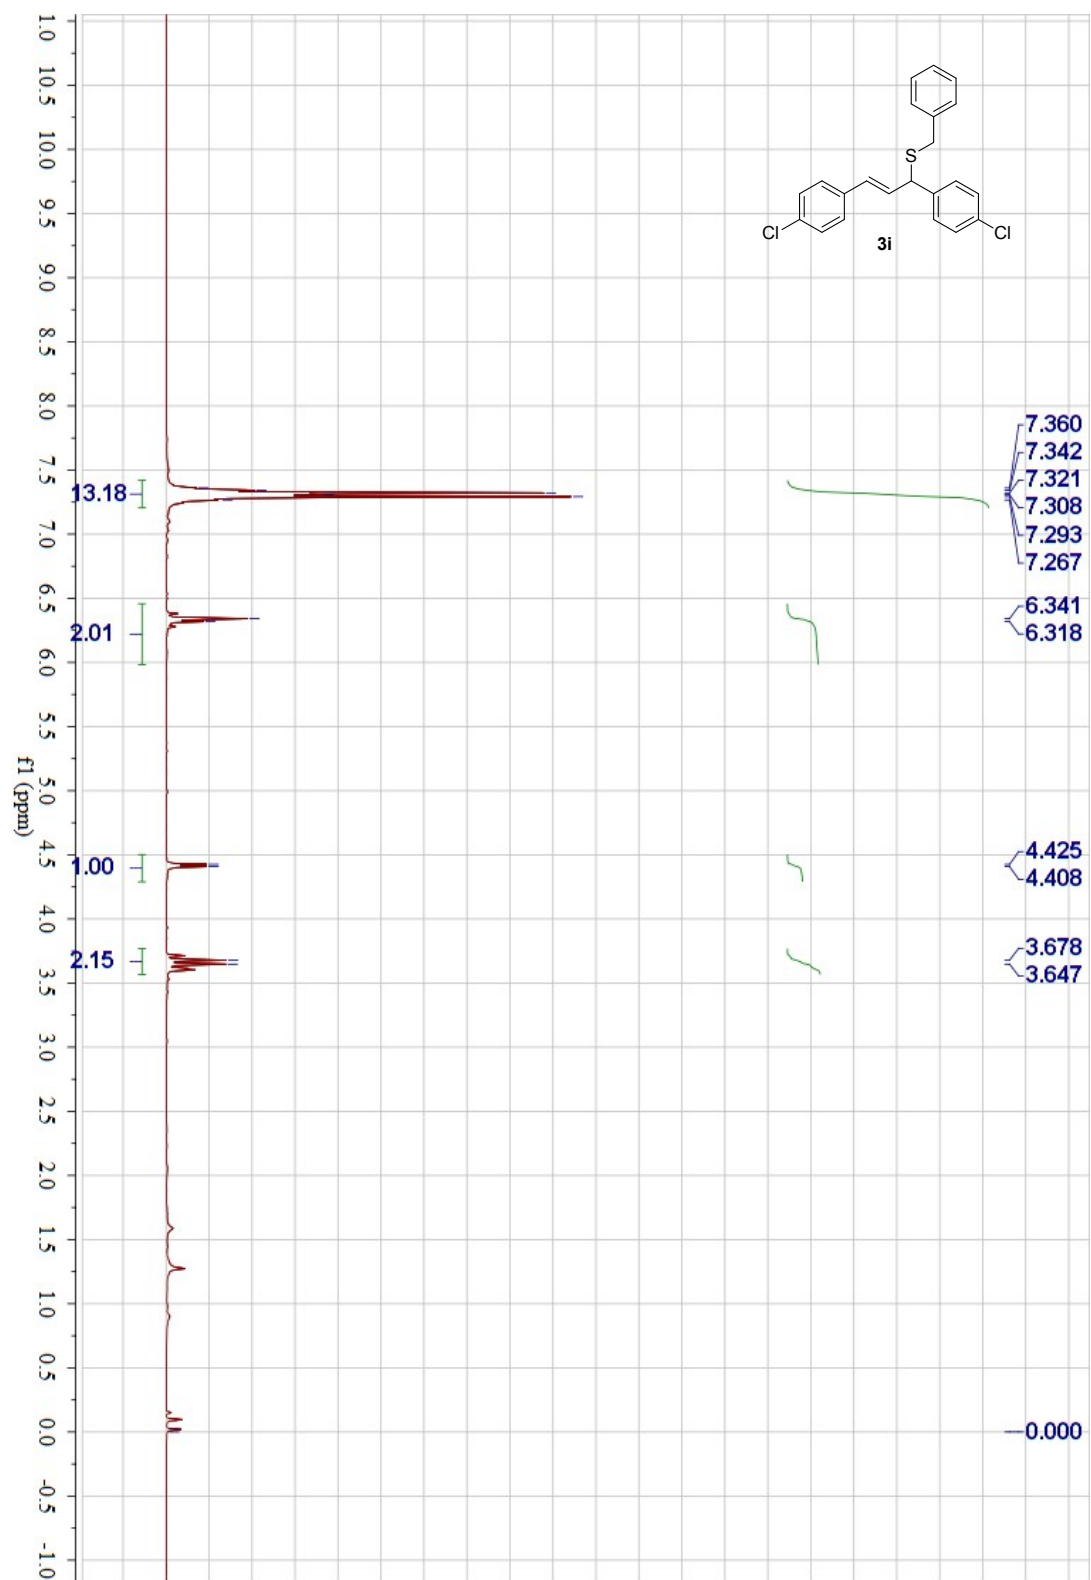

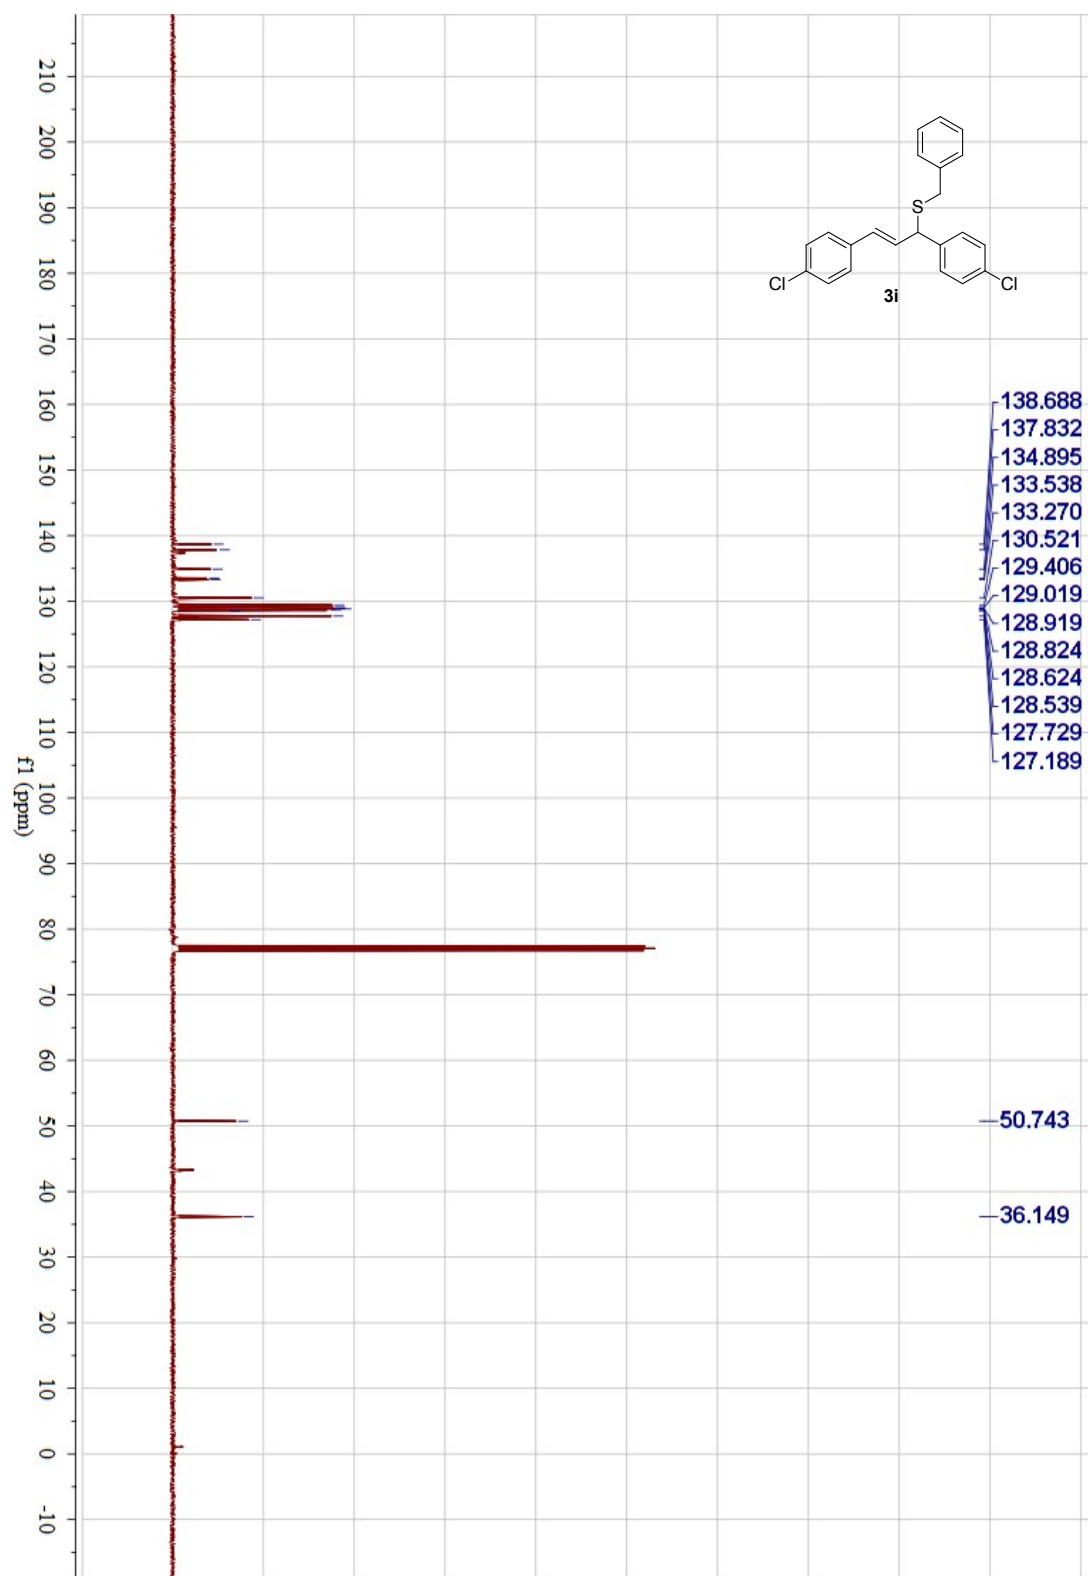



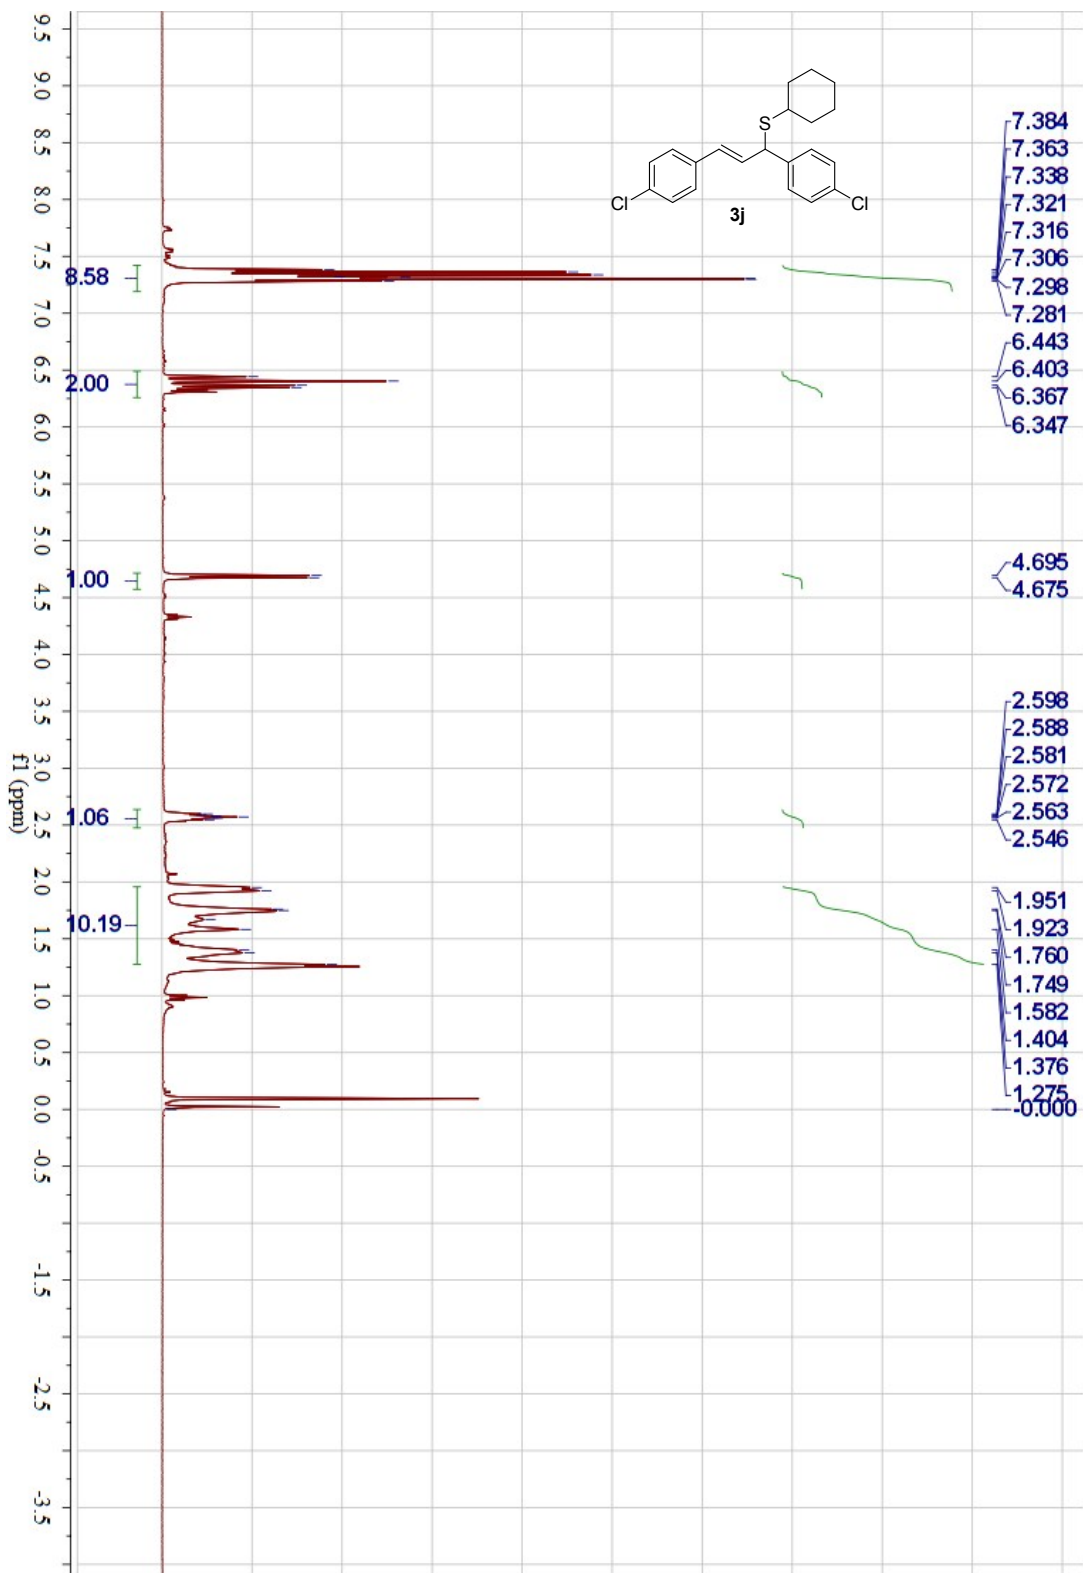

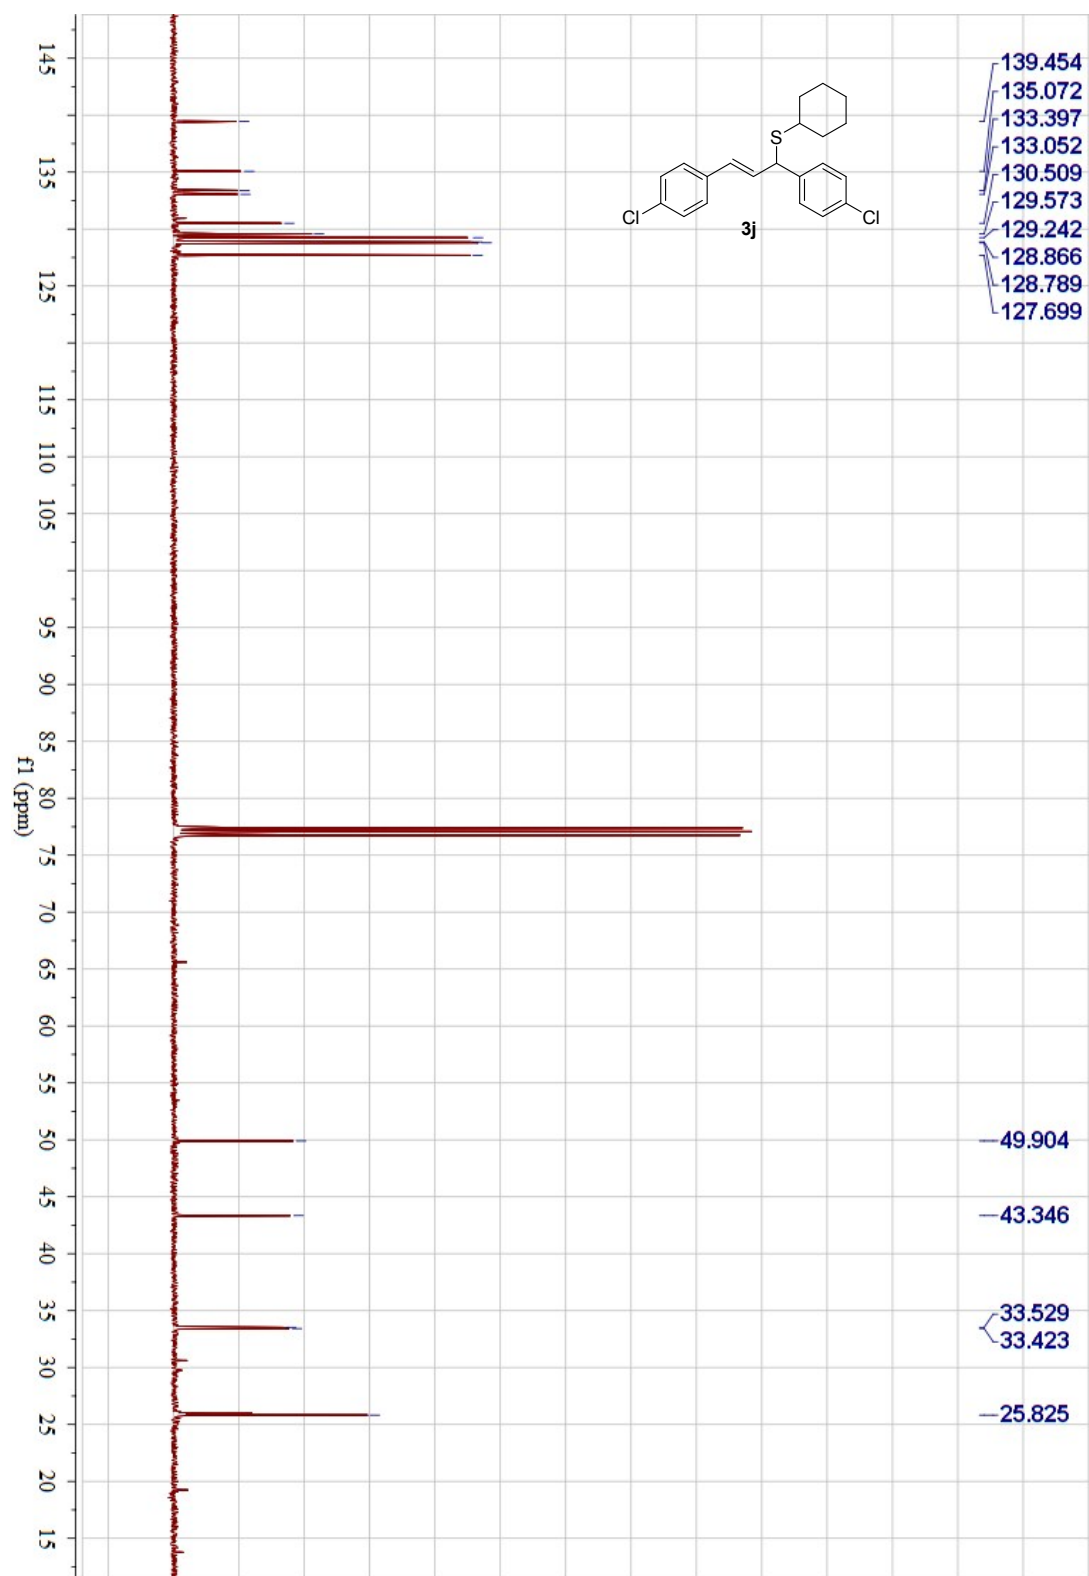

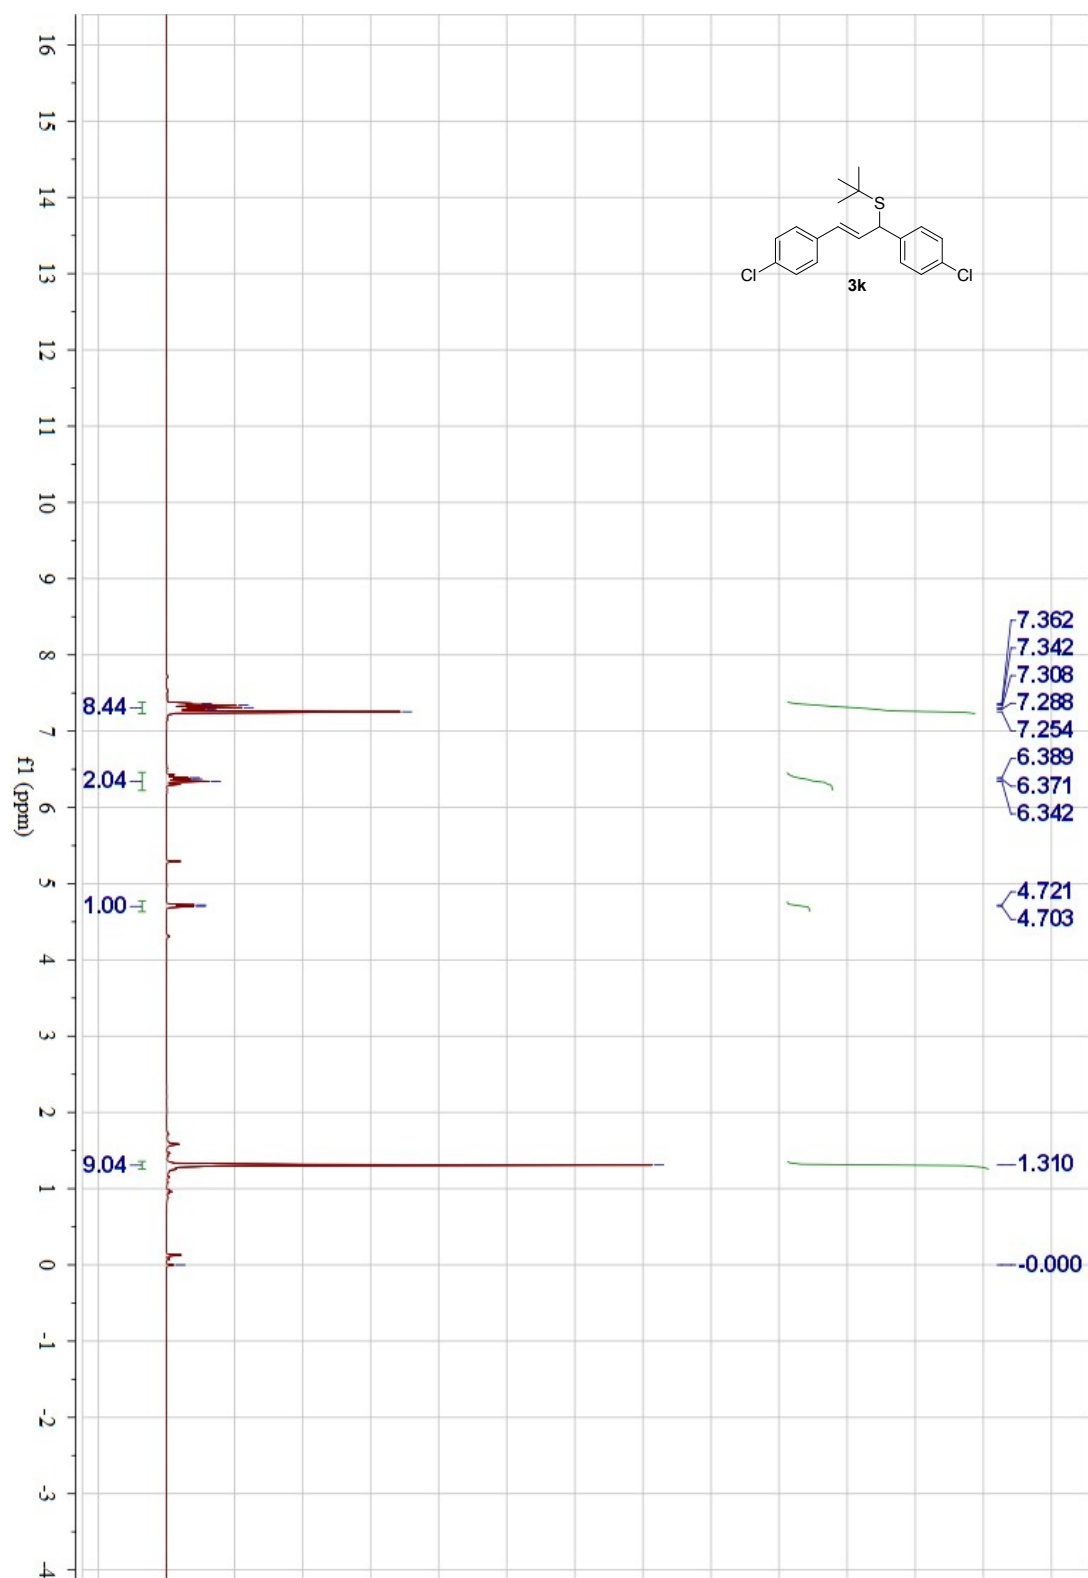

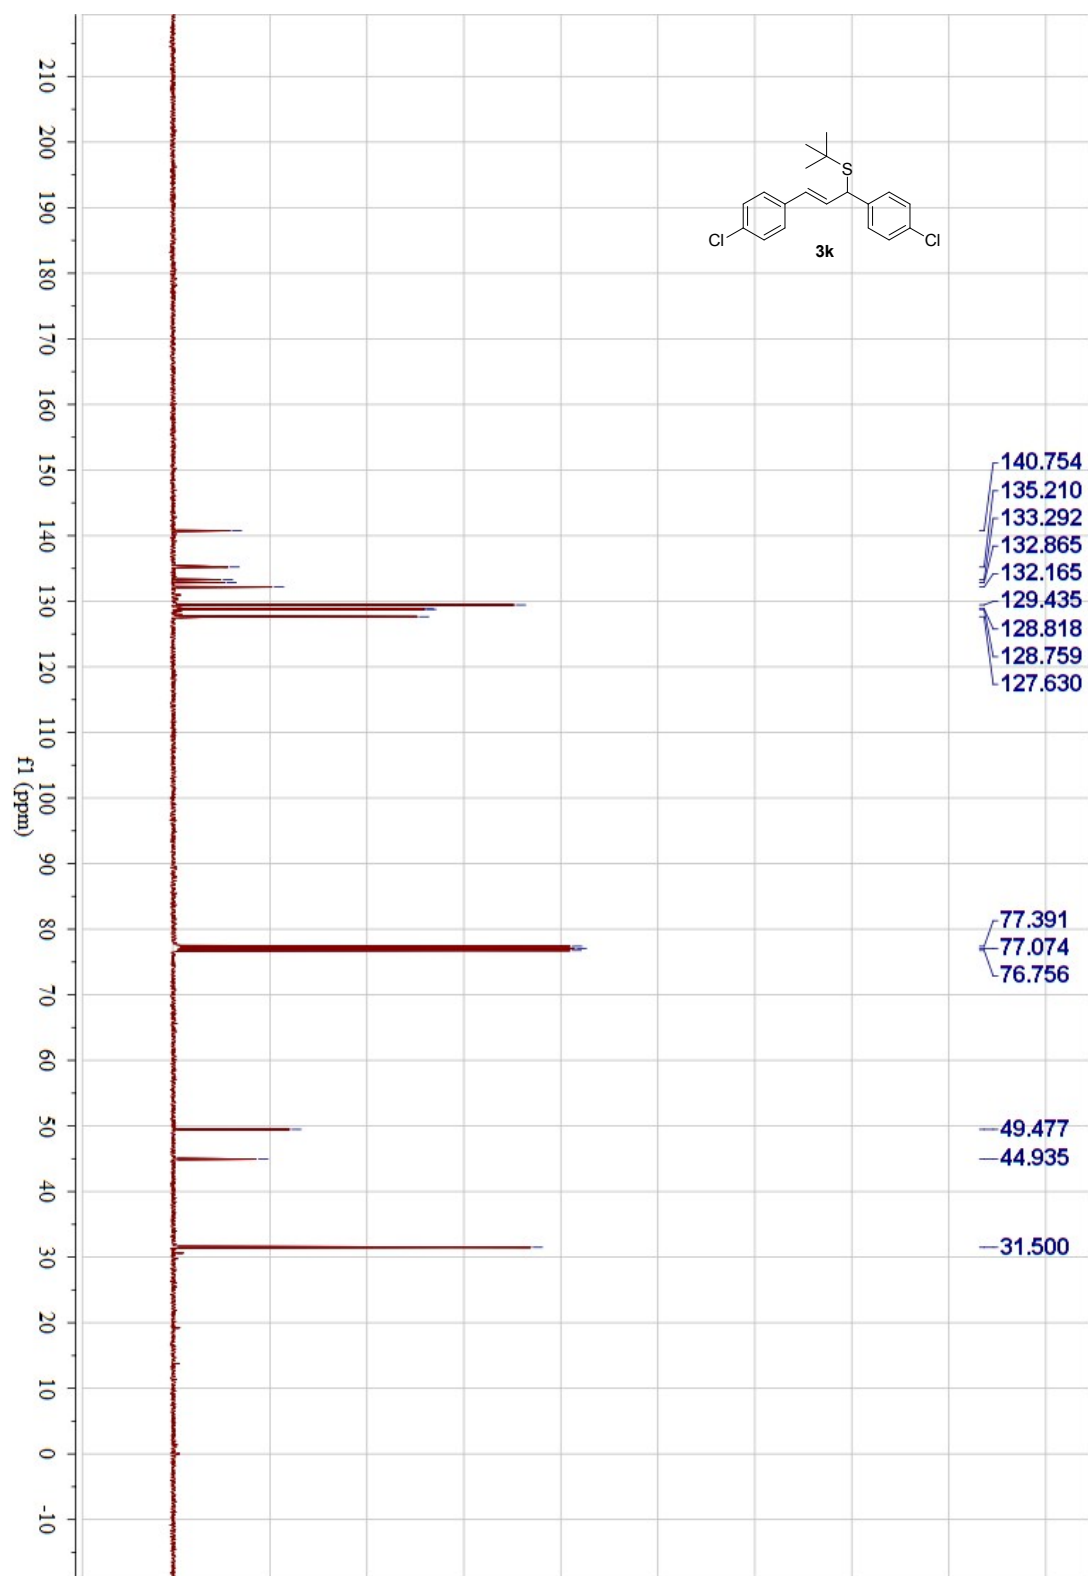

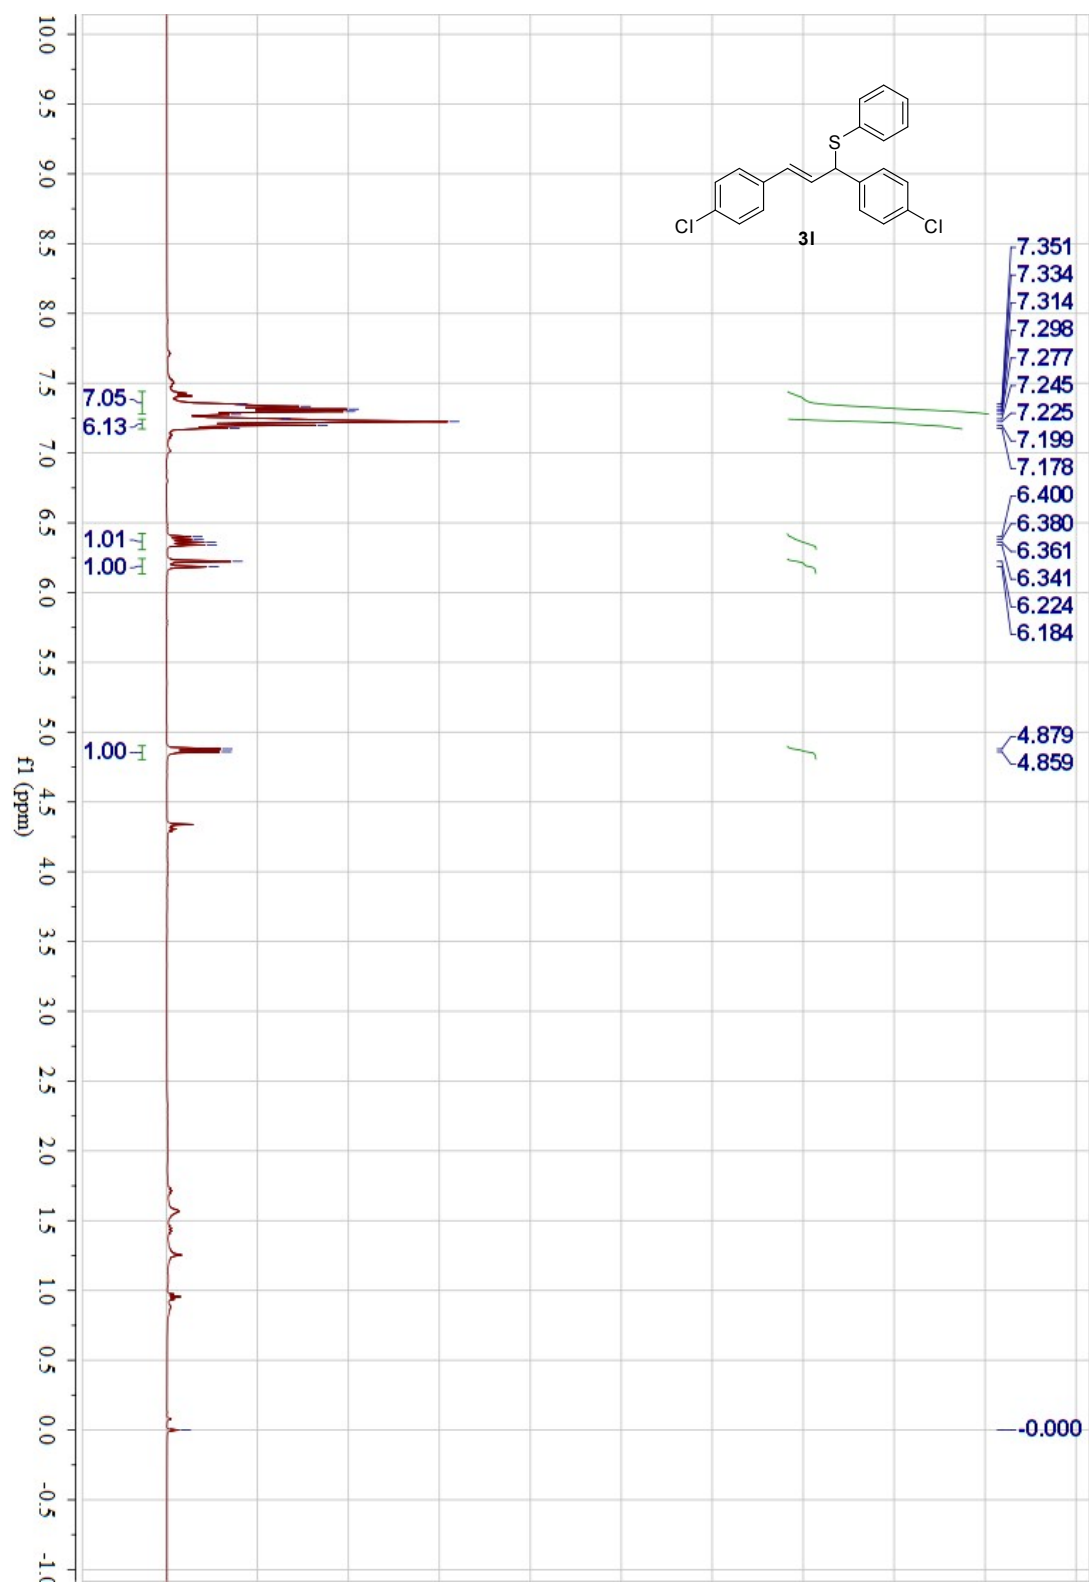

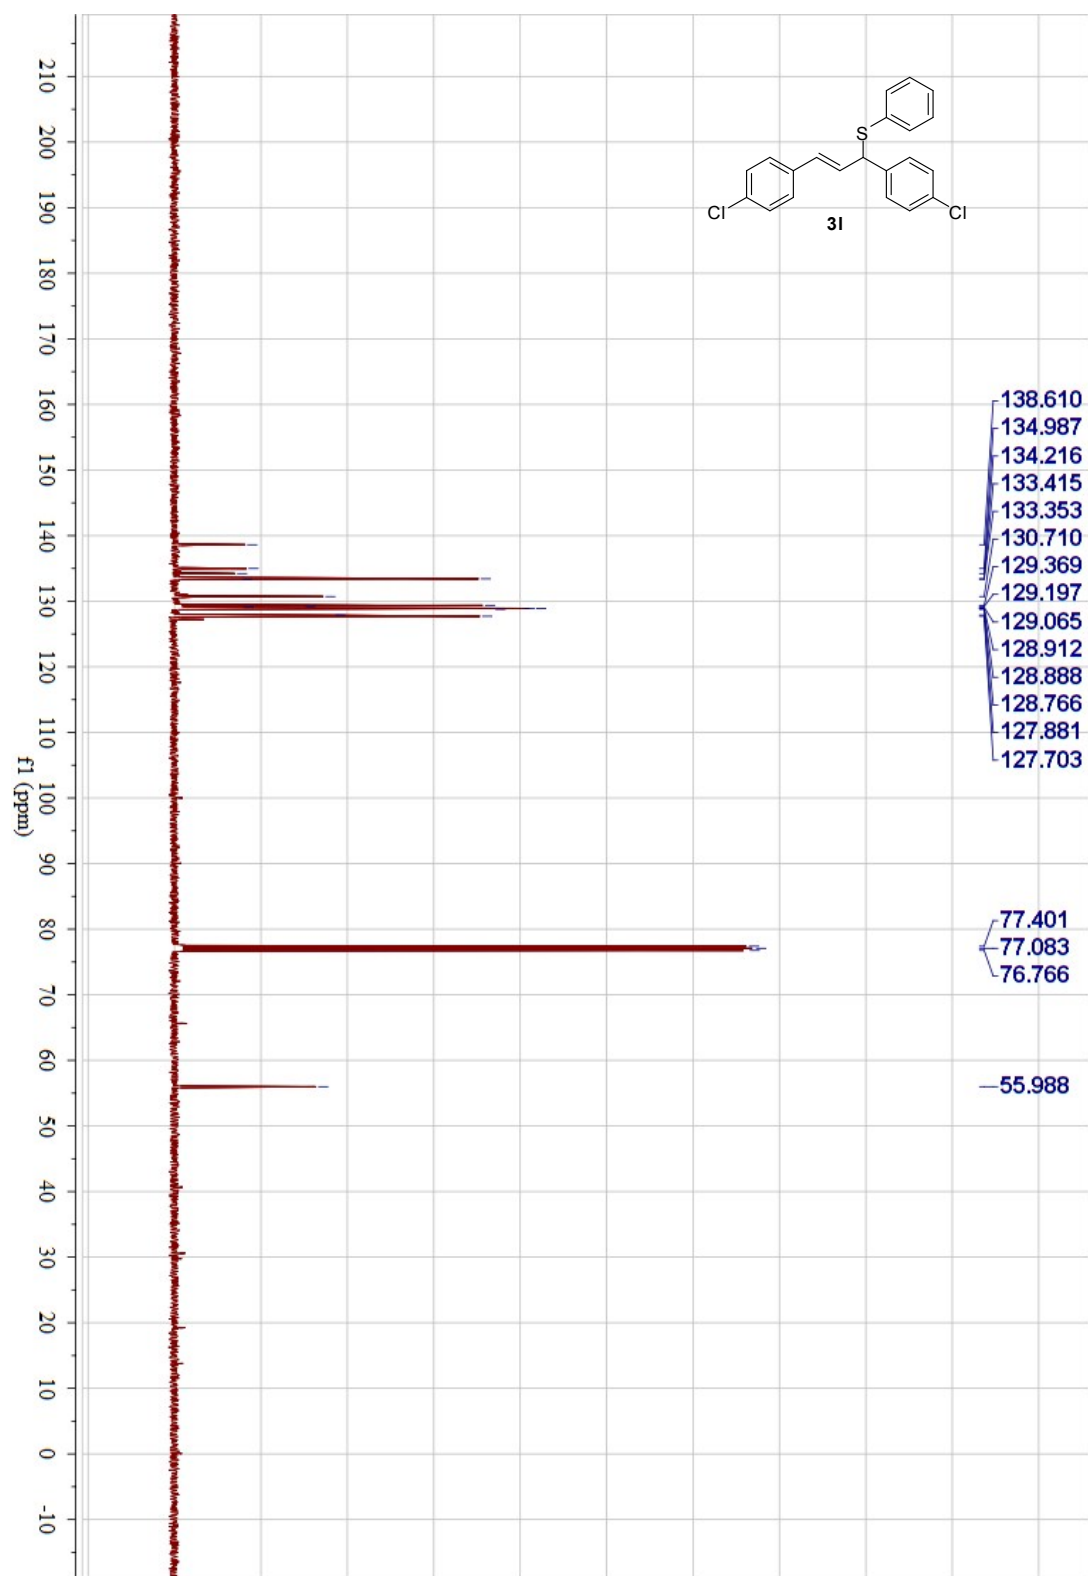

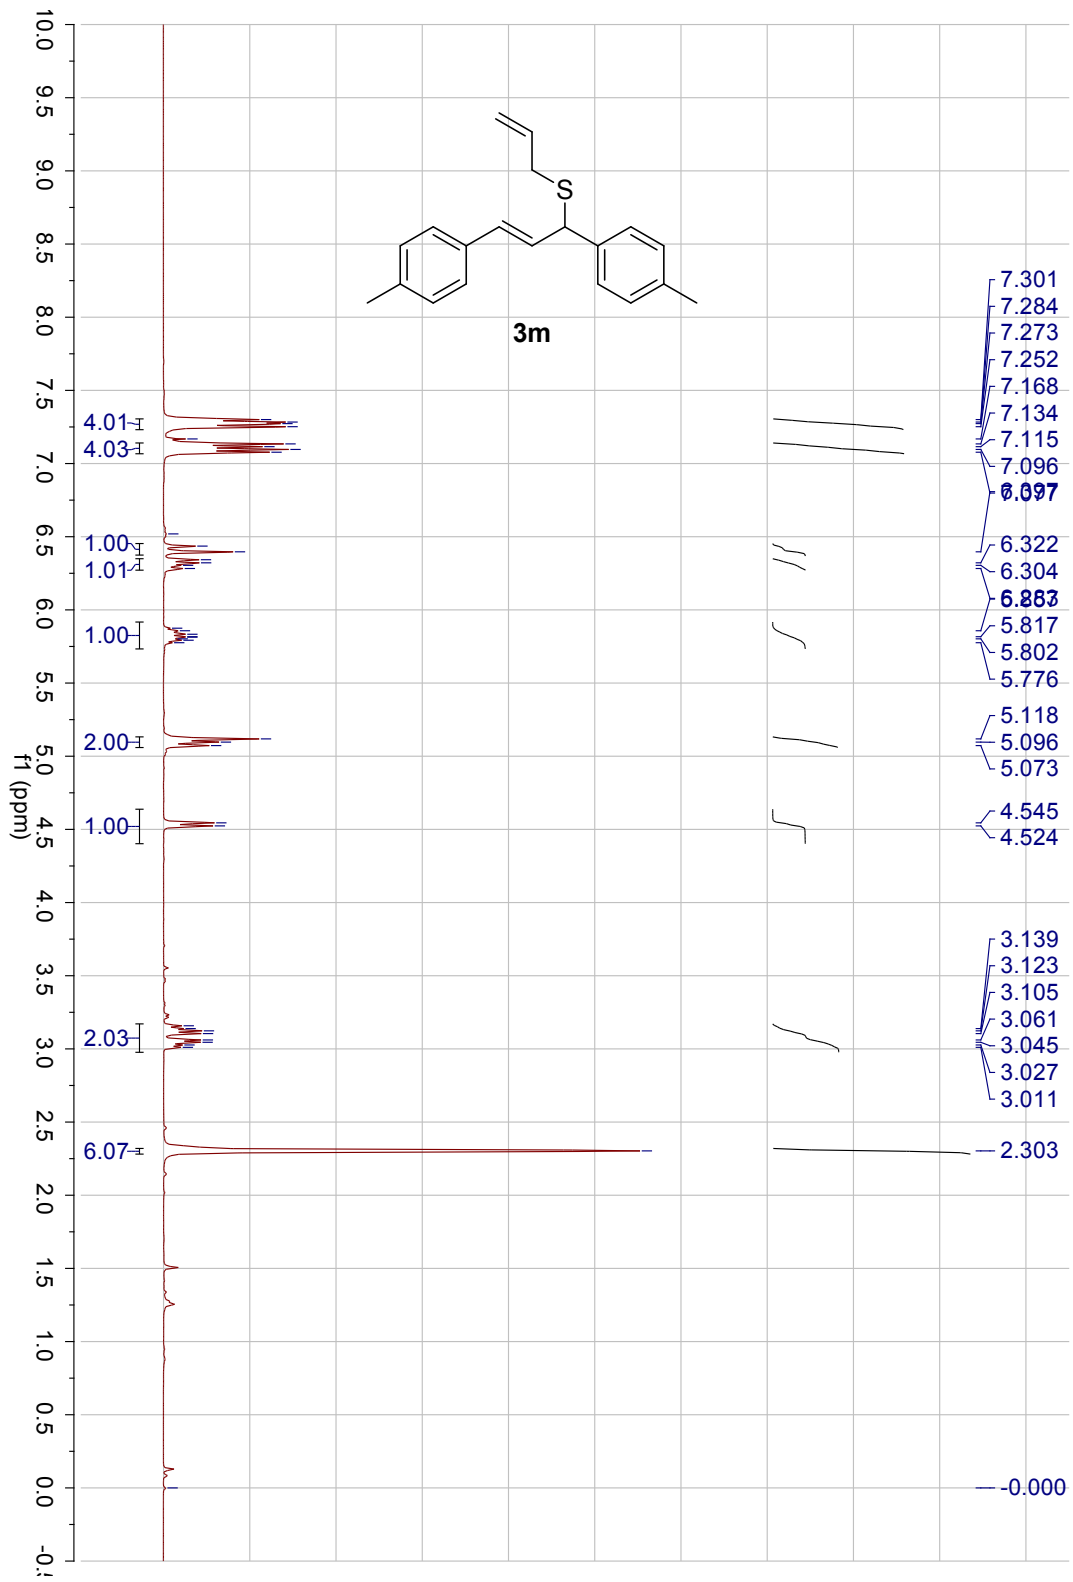

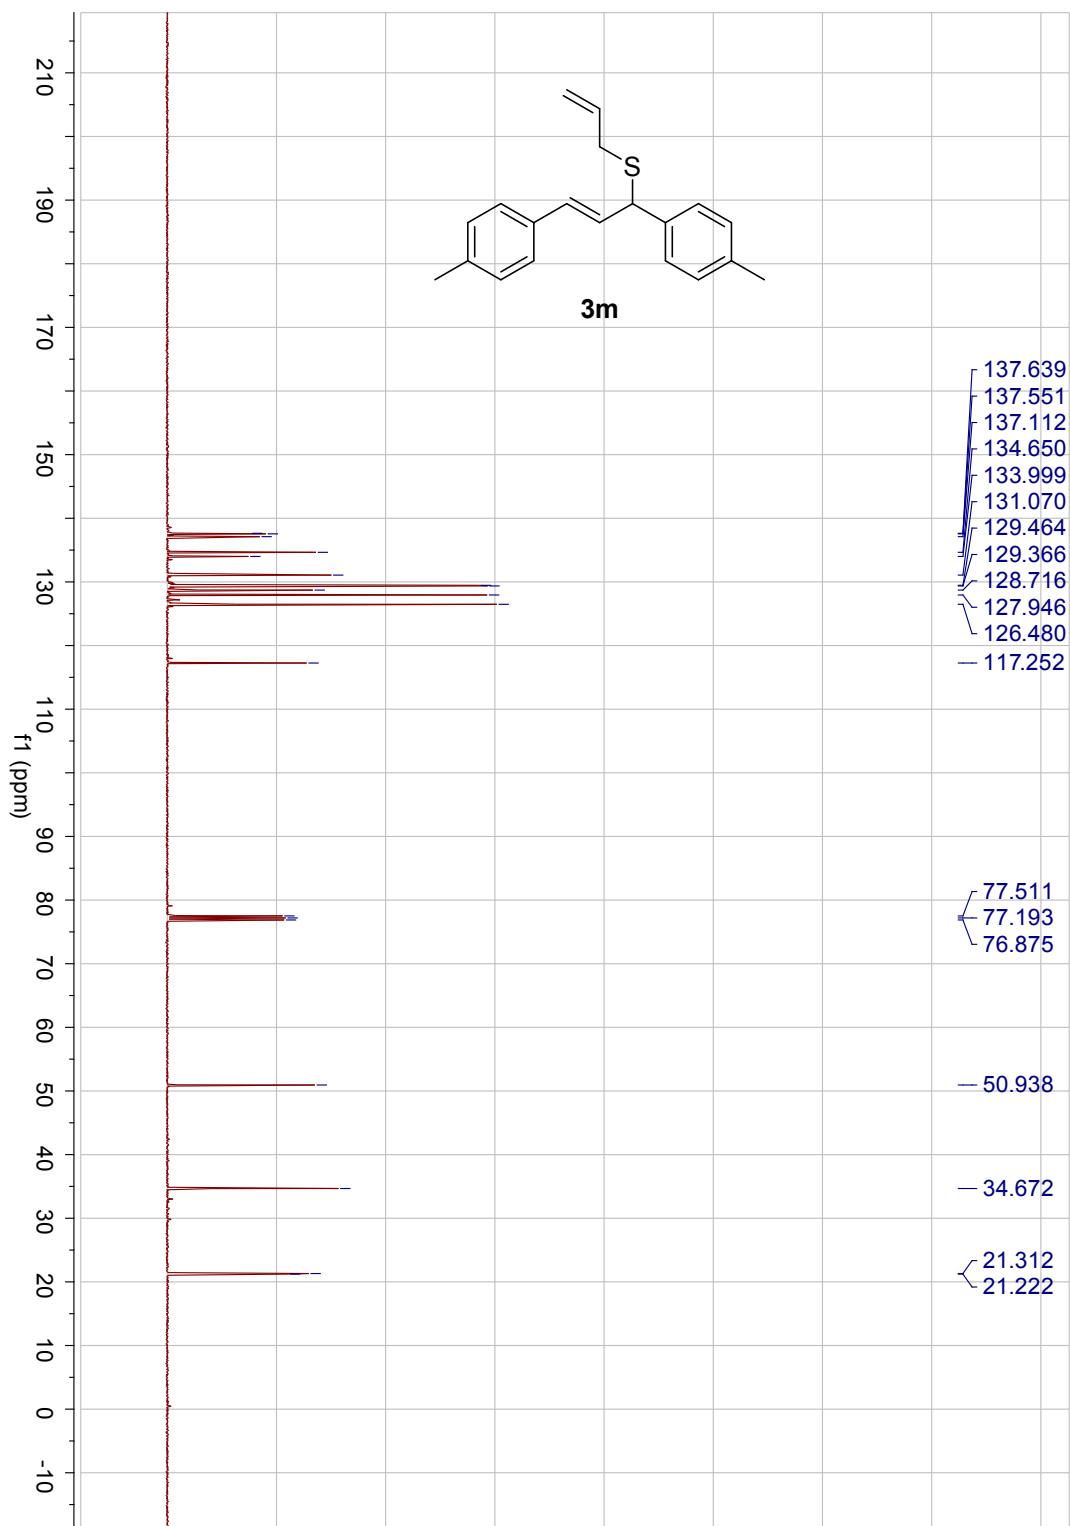

### HPLC Chromatograms of the Chiral Compounds 3:



### Chiral-3a

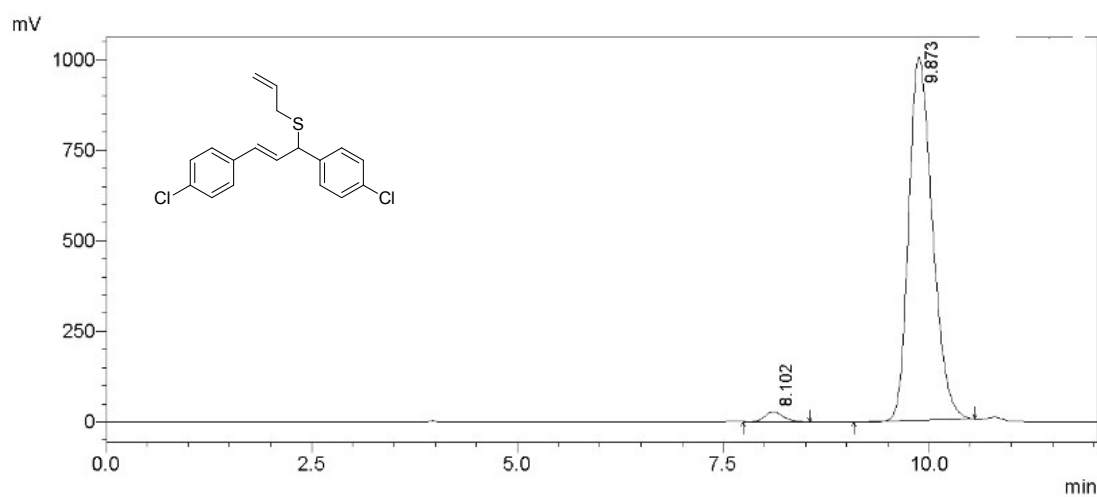

| Peak No. | R. Time | Peak Area | Peak Hight | Area Percent |
|----------|---------|-----------|------------|--------------|
| 1        | 8.099   | 490030    | 31942      | 2.078        |
| 2        | 9.871   | 23092573  | 1141784    | 97.922       |
| Total    |         | 23582603  | 1173726    | 100.000      |

### Rac-3a

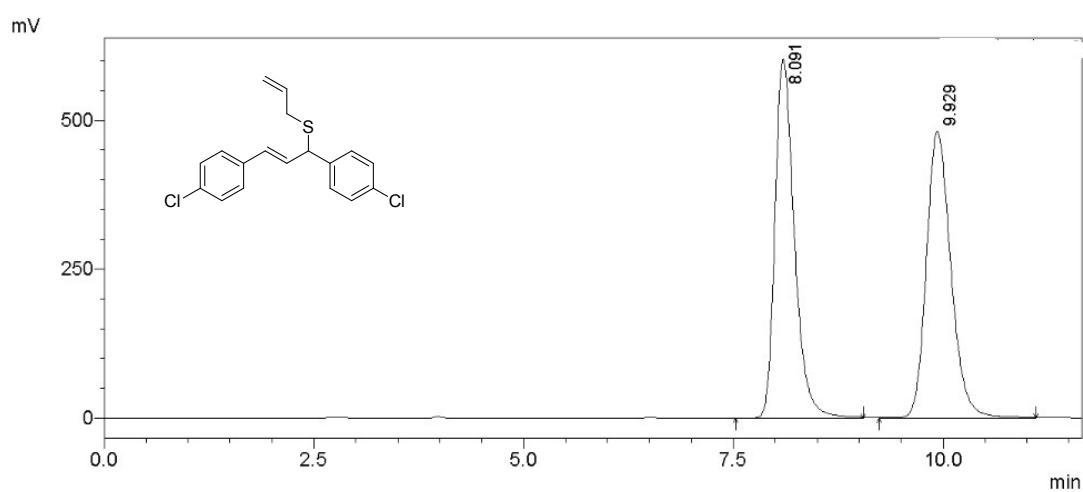

| Peak No. | R. Time | Peak Area | Peak Hight | Area Percent |
|----------|---------|-----------|------------|--------------|
| 1        | 8.090   | 10956316  | 687914     | 49.683       |
| 2        | 9.927   | 11096313  | 548026     | 50.317       |
| Total    |         | 22052630  | 1235940    | 100.000      |

### Chiral-3b

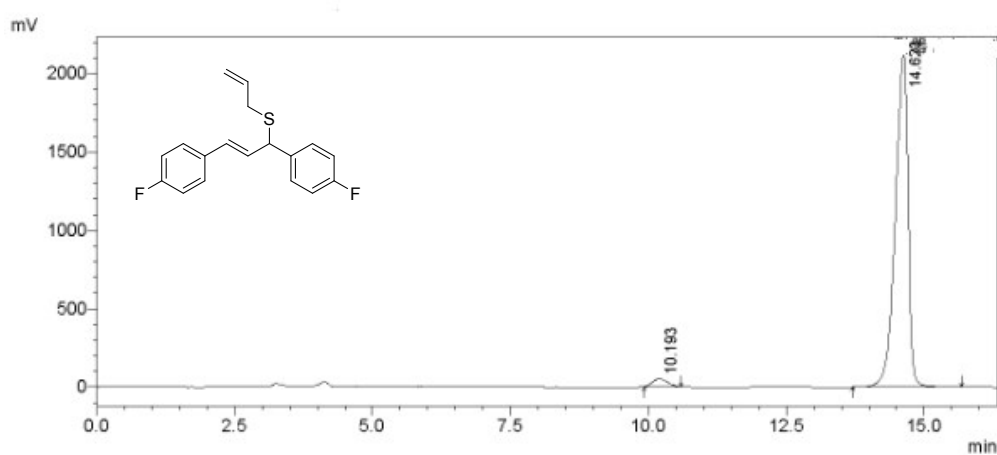

| Peak No. | R. Time | Peak Area | Peak Hight | Area Percent |
|----------|---------|-----------|------------|--------------|
| 1        | 10.193  | 990948    | 51704      | 2.816        |
| 2        | 14.623  | 34203130  | 2115594    | 97.184       |
| Total    |         | 35194078  | 2167298    | 100.000      |

### Rac-3b

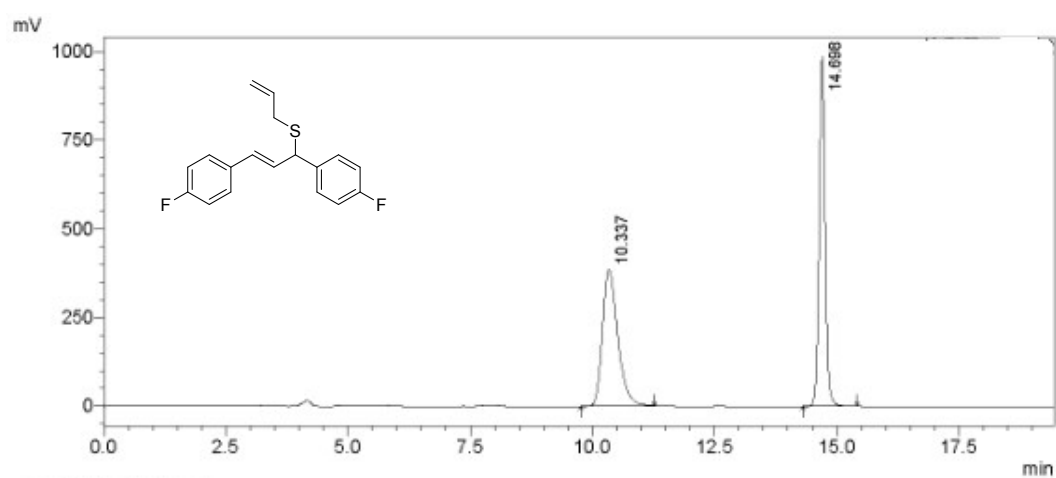

| Peak No. | R. Time | Peak Area | Peak Hight | Area Percent |
|----------|---------|-----------|------------|--------------|
| 1        | 10.336  | 9005813   | 405227     | 50.713       |
| 2        | 14.696  | 8752411   | 1007688    | 49.287       |
| Total    |         | 17758223  | 1412915    | 100.000      |

### Chiral-3c

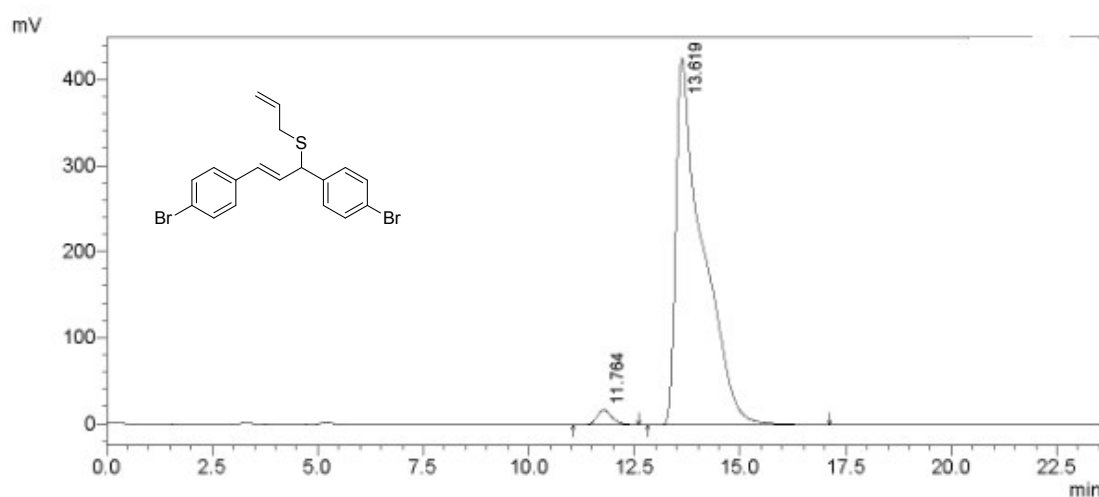

| Peak No. | R. Time | Peak Area | Peak Hight | Area Percent |
|----------|---------|-----------|------------|--------------|
| 1        | 11.764  | 516469    | 21179      | 2.217        |
| 2        | 13.619  | 22776307  | 519244     | 97.783       |
| Total    |         | 23292777  | 540423     | 100.000      |

### Rac-3c

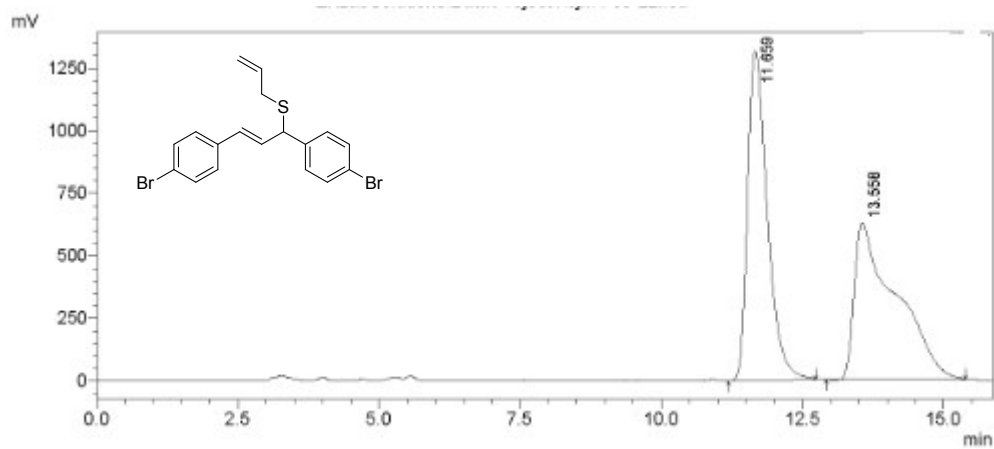

| Peak No. | R. Time | Peak Area | Peak Hight | Area Percent |
|----------|---------|-----------|------------|--------------|
| 1        | 11.659  | 32027070  | 1314412    | 50.127       |
| 2        | 13.558  | 31864259  | 625720     | 49.873       |
| Total    |         | 63891329  | 1940132    | 100.000      |

### Chiral-3d

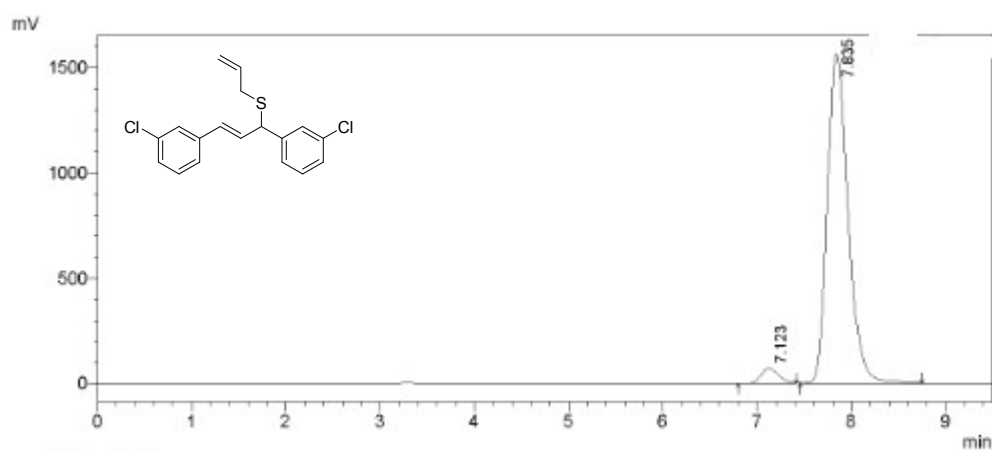

| Peak No. | R. Time | Peak Area | Peak Hight | Area Percent |
|----------|---------|-----------|------------|--------------|
| 1        | 7.123   | 920864    | 72895      | 3.698        |
| 2        | 7.835   | 23978207  | 1563799    | 96.302       |
| Total    |         | 24899071  | 1636693    | 100.000      |

### Rac-3d

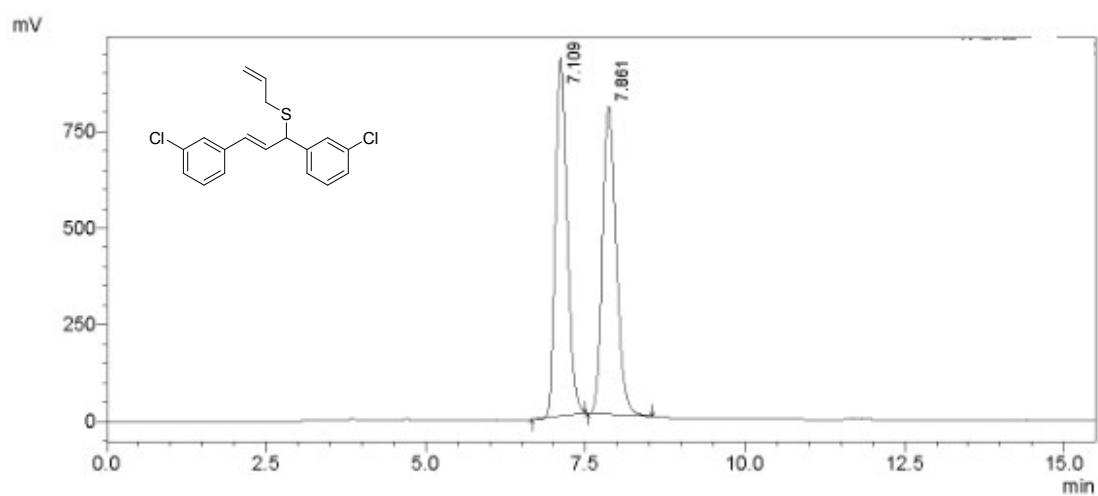

| Peak No. | R. Time | Peak Area | Peak Hight | Area Percent |
|----------|---------|-----------|------------|--------------|
| 1        | 7.109   | 11727470  | 926642     | 49.447       |
| 2        | 7.861   | 11989790  | 796792     | 50.553       |
| Total    |         | 2371726   | 1723434    | 100.000      |

### Chiral-3e

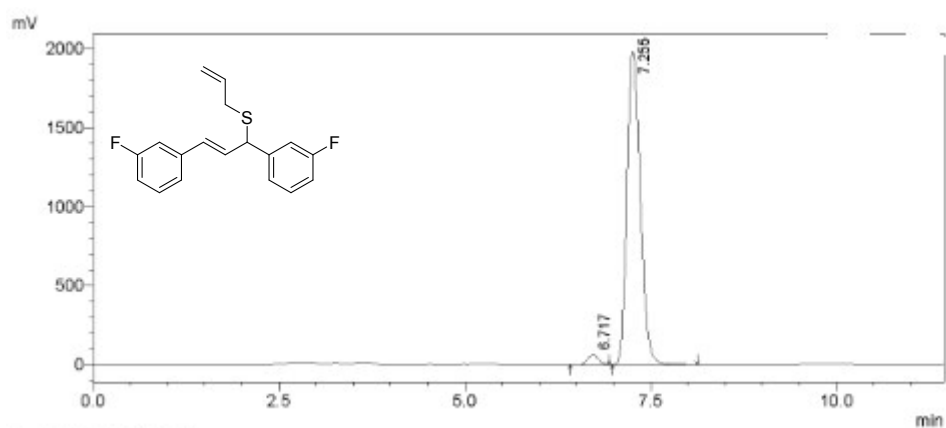

| Peak No. | R. Time | Peak Area | Peak Hight | Area Percent |
|----------|---------|-----------|------------|--------------|
| 1        | 6.717   | 680435    | 63018      | 2.674        |
| 2        | 7.255   | 24769493  | 1982542    | 97.326       |
| Total    |         | 25449928  | 2045560    | 100.000      |

### Rac-3e

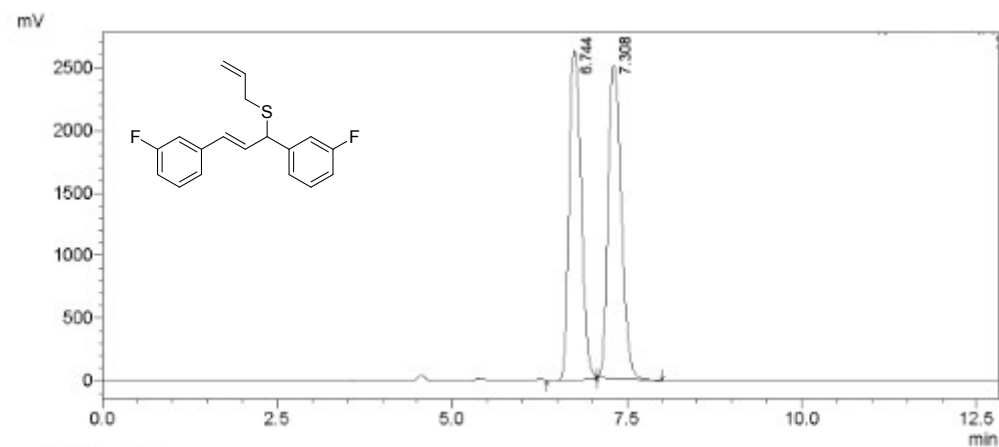

| Peak No. | R. Time | Peak Area | Peak Hight | Area Percent |
|----------|---------|-----------|------------|--------------|
| 1        | 6.744   | 31791852  | 2628060    | 48.990       |
| 2        | 7.308   | 33103172  | 2493495    | 51.010       |
| Total    |         | 64895024  | 5121555    | 100.000      |

### Chiral-3f

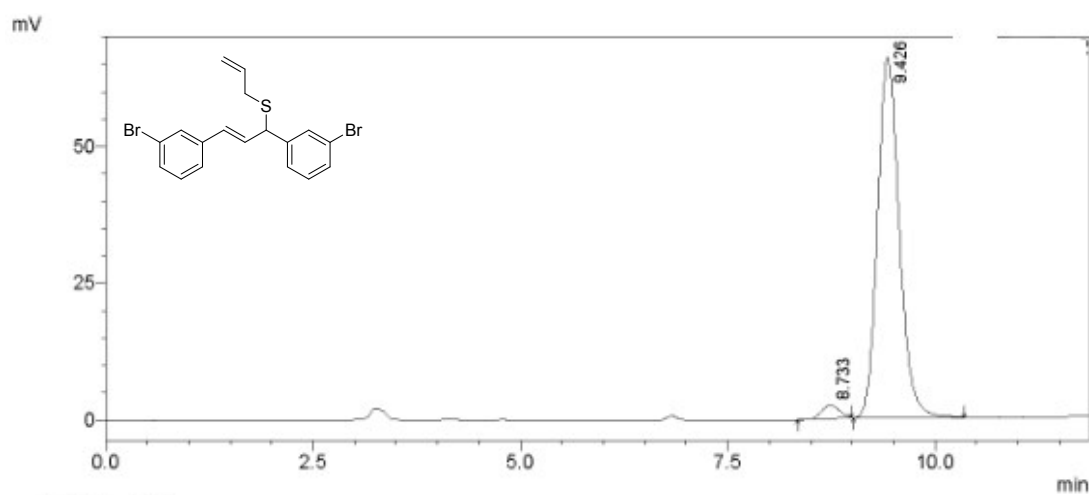

| Peak No. | R. Time | Peak Area | Peak Hight | Area Percent |
|----------|---------|-----------|------------|--------------|
| 1        | 8.733   | 34503     | 2405       | 2.778        |
| 2        | 9.426   | 1207649   | 65924      | 97.222       |
| Total    |         | 1242151   | 68329      | 100.000      |

### Rac-3f

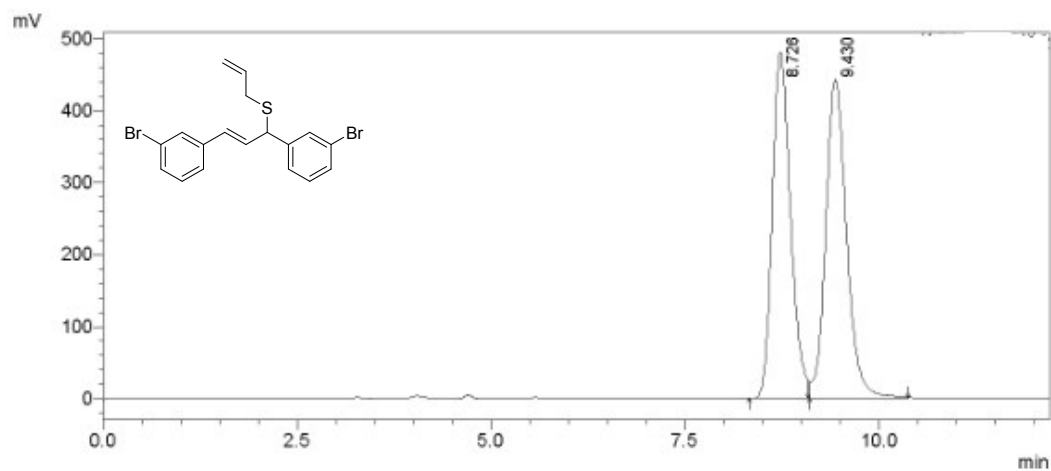

| Peak No. | R. Time | Peak Area | Peak Hight | Area Percent |
|----------|---------|-----------|------------|--------------|
| 1        | 8.726   | 7854168   | 480216     | 48.735       |
| 2        | 9.430   | 8261777   | 442154     | 51.265       |
| Total    |         | 16115946  | 922370     | 100.000      |

### Chiral-3g

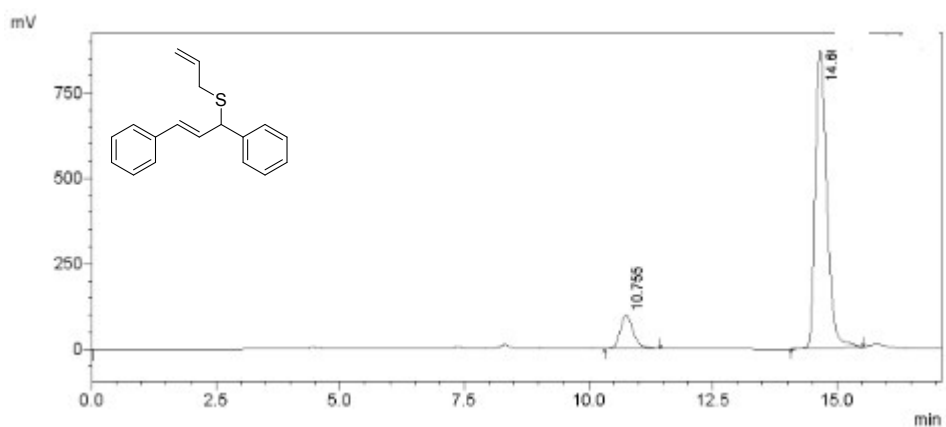

| Peak No. | R. Time | Peak Area | Peak Hight | Area Percent |
|----------|---------|-----------|------------|--------------|
| 1        | 10.755  | 1819034   | 98154      | 11.340       |
| 2        | 14.660  | 14222168  | 870426     | 88.660       |
| Total    |         | 16041202  | 968580     | 100.000      |

### Rac-3g

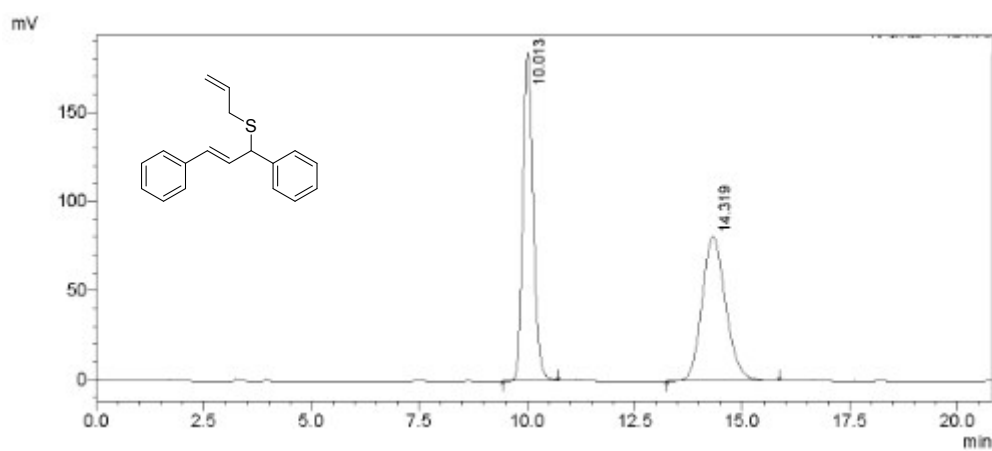

| Peak No. | R. Time | Peak Area | Peak Hight | Area Percent |
|----------|---------|-----------|------------|--------------|
| 1        | 10.013  | 3096722   | 183904     | 50.026       |
| 2        | 14.319  | 3093525   | 80822      | 49.974       |
| Total    |         | 6190247   | 264726     | 100.000      |

### Chiral-3h

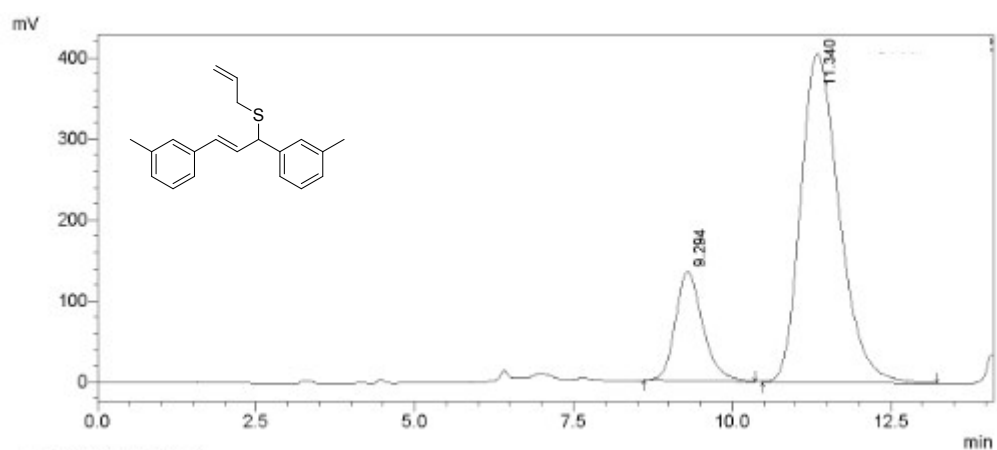

| Peak No. | R. Time | Peak Area | Peak Hight | Area Percent |
|----------|---------|-----------|------------|--------------|
| 1        | 9.294   | 4054181   | 134110     | 19.130       |
| 2        | 11.340  | 17138655  | 405193     | 80.870       |
| Total    |         | 21192837  | 539303     | 100.000      |

### Rac-3h

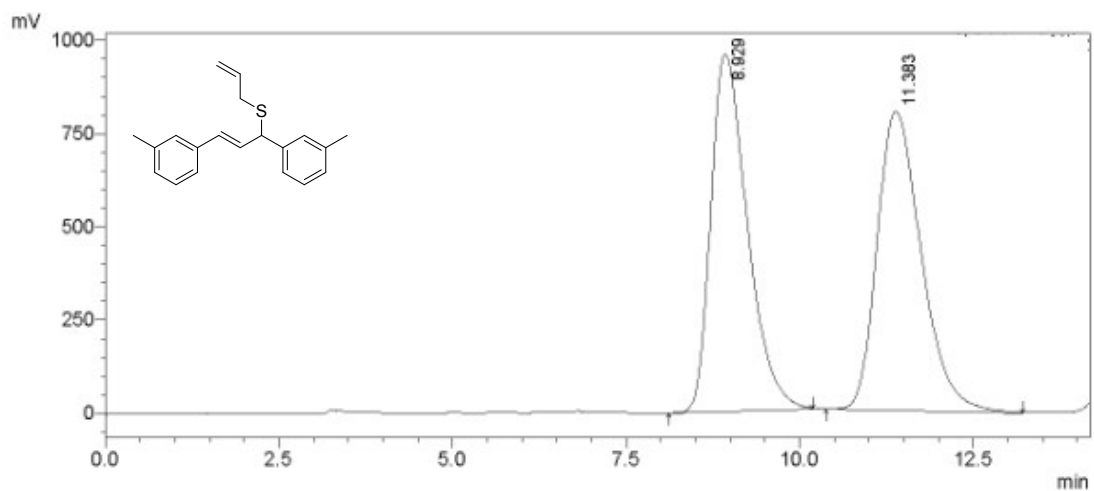

| Peak No. | R. Time | Peak Area | Peak Hight | Area Percent |
|----------|---------|-----------|------------|--------------|
| 1        | 8.929   | 35124929  | 958356     | 49.694       |
| 2        | 11.383  | 35557137  | 801813     | 50.306       |
| Total    |         | 70682065  | 1760169    | 100.000      |



### Chiral-3i

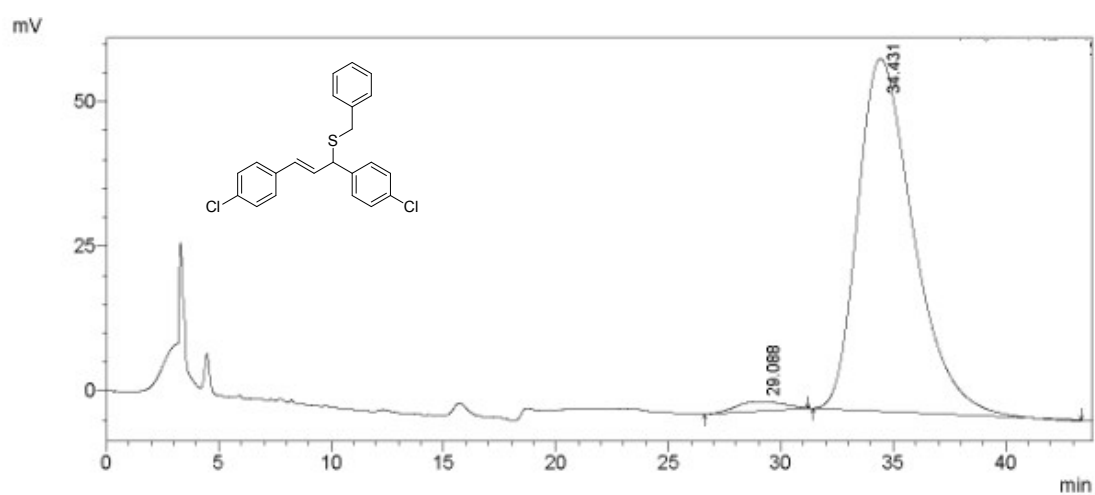

| Peak No. | R. Time | Peak Area | Peak Hight | Area Percent |
|----------|---------|-----------|------------|--------------|
| 1        | 29.088  | 229586    | 1629       | 2.143        |
| 2        | 34.431  | 10484714  | 60982      | 97.857       |
| Total    |         | 10714300  | 62611      | 100.000      |

### Rac-3i

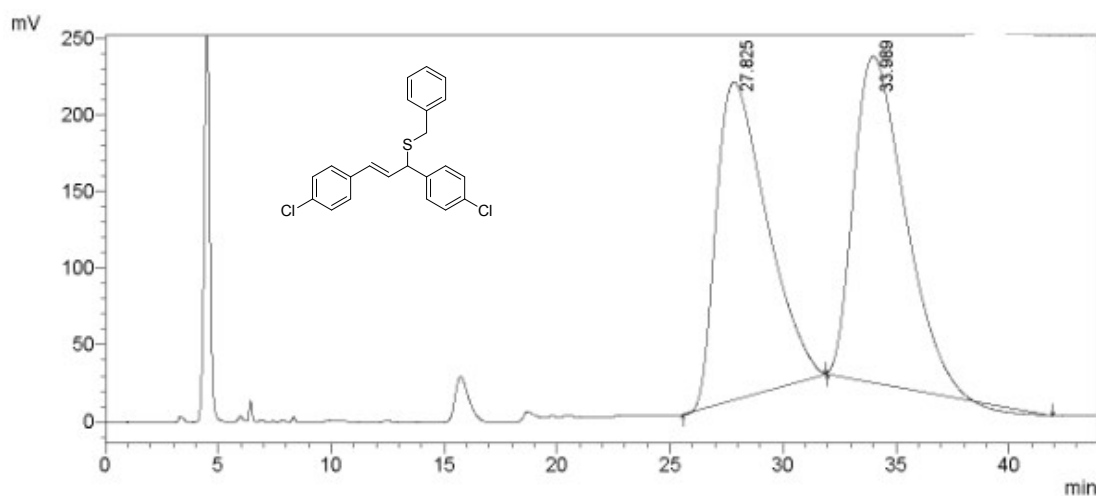

| Peak No. | R. Time | Peak Area | Peak Hight | Area Percent |
|----------|---------|-----------|------------|--------------|
| 1        | 27.825  | 32263413  | 207484     | 49.003       |
| 2        | 33.989  | 33575798  | 212946     | 50.997       |
| Total    |         | 65839212  | 420430     | 100.000      |

### Chiral-3j

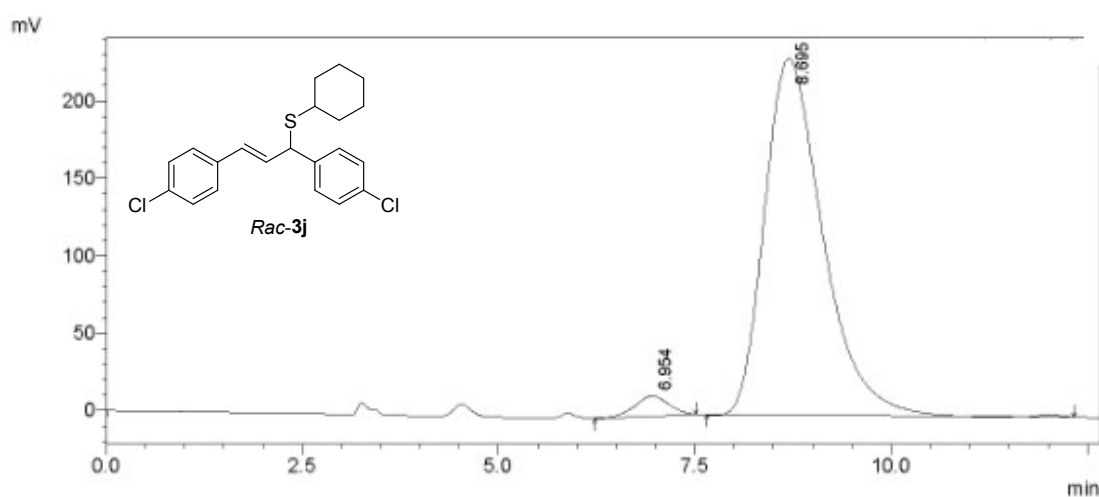

| Peak No. | R. Time | Peak Area | Peak Hight | Area Percent |
|----------|---------|-----------|------------|--------------|
| 1        | 6.954   | 407354    | 13213      | 3.322        |
| 2        | 8.695   | 11855430  | 230350     | 96.678       |
| Total    |         | 12262784  | 243563     | 100.000      |

### Rac-3j

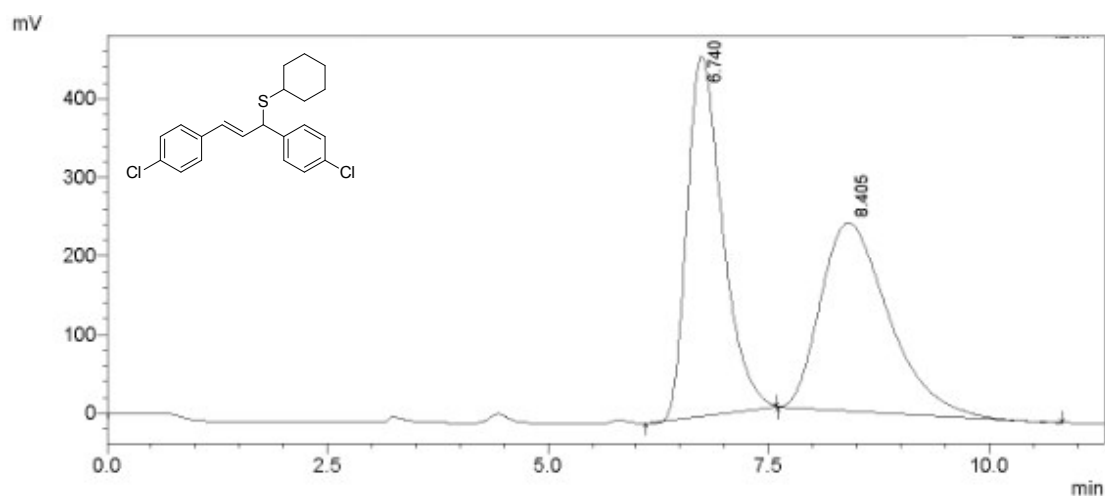

| Peak No. | R. Time | Peak Area | Peak Hight | Area Percent |
|----------|---------|-----------|------------|--------------|
| 1        | 6.740   | 12785243  | 457468     | 49.868       |
| 2        | 8.405   | 12853048  | 238985     | 50.123       |
| Total    |         | 25638291  | 696453     | 100.000      |

### Chiral-3k

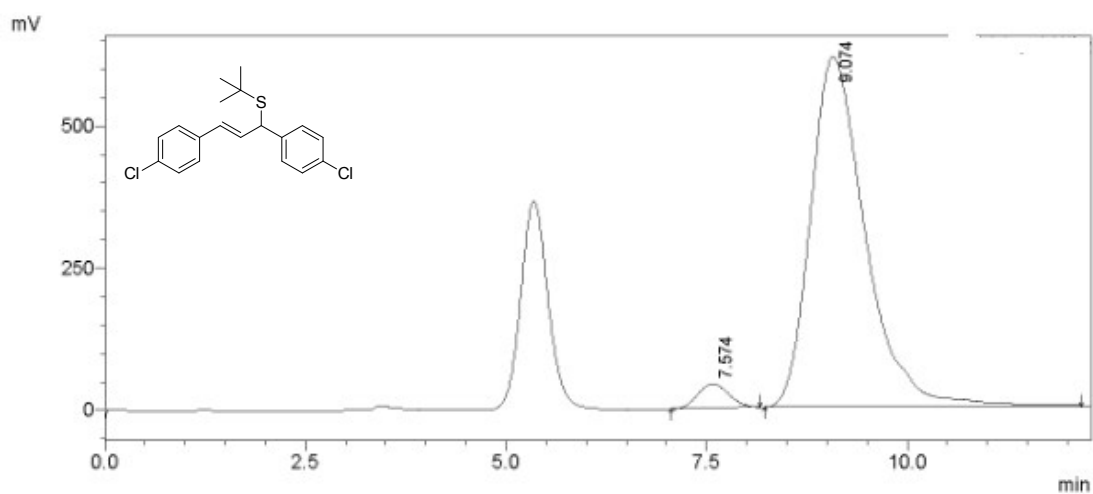

| Peak No. | R. Time | Peak Area | Peak Hight | Area Percent |
|----------|---------|-----------|------------|--------------|
| 1        | 7.574   | 1097011   | 41872      | 3.608        |
| 2        | 9.074   | 29309043  | 614939     | 96.392       |
| Total    |         | 30406054  | 656811     | 100.000      |

### Rac-3k

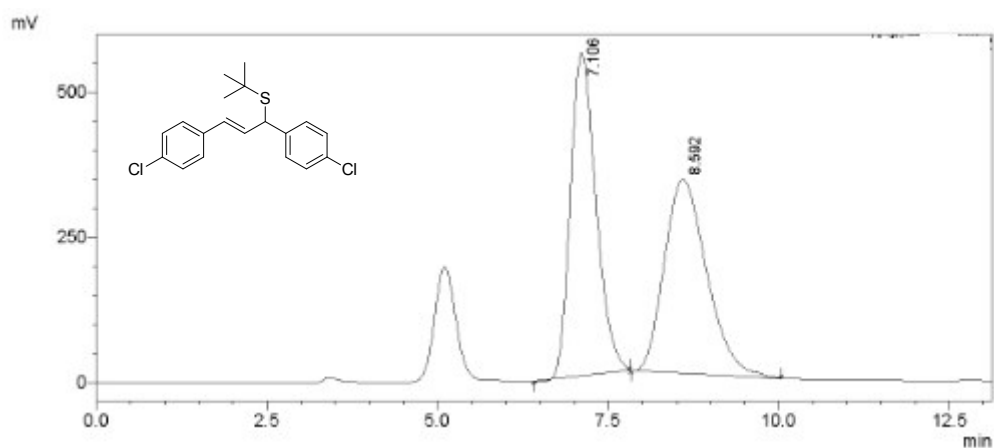

| Peak No. | R. Time | Peak Area | Peak Hight | Area Percent |
|----------|---------|-----------|------------|--------------|
| 1        | 7.106   | 14501510  | 557144     | 50.144       |
| 2        | 8.592   | 14418489  | 333449     | 49.856       |
| Total    |         | 28919999  | 890593     | 100.000      |

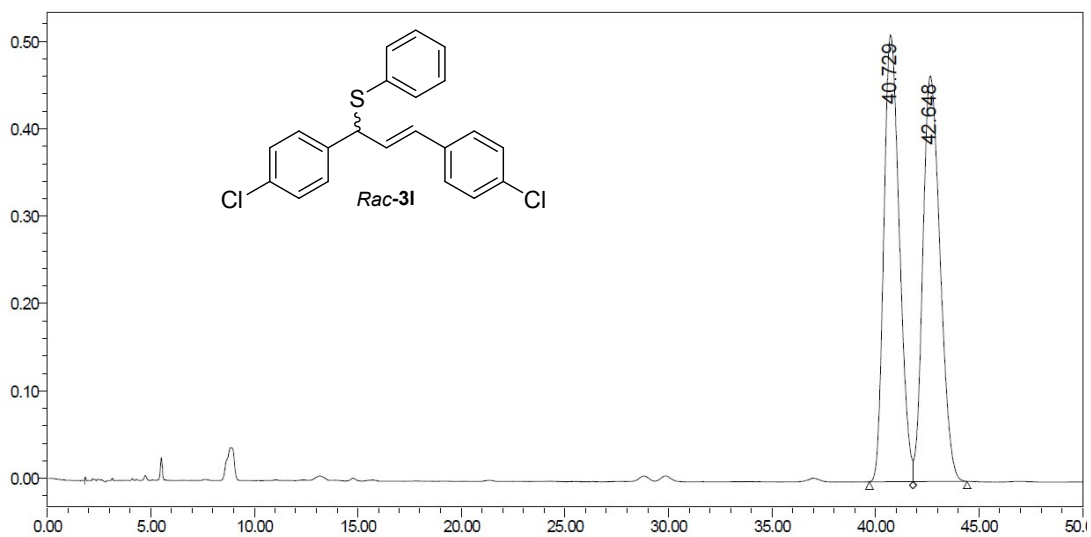

|   | RT     | Area     | Height | % Area |
|---|--------|----------|--------|--------|
| 1 | 40.729 | 26614262 | 511103 | 49.77  |
| 2 | 42.648 | 26863719 | 464307 | 50.23  |

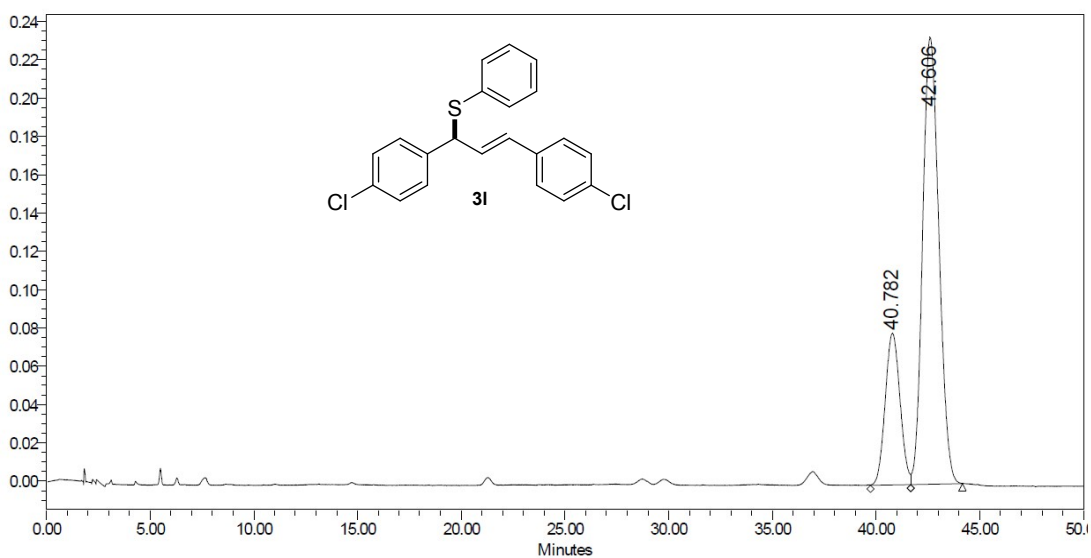

|   | RT     | Area     | Height | % Area |
|---|--------|----------|--------|--------|
| 1 | 40.782 | 3929710  | 79154  | 23.66  |
| 2 | 42.606 | 12680548 | 233268 | 76.34  |

### Chiral-3m

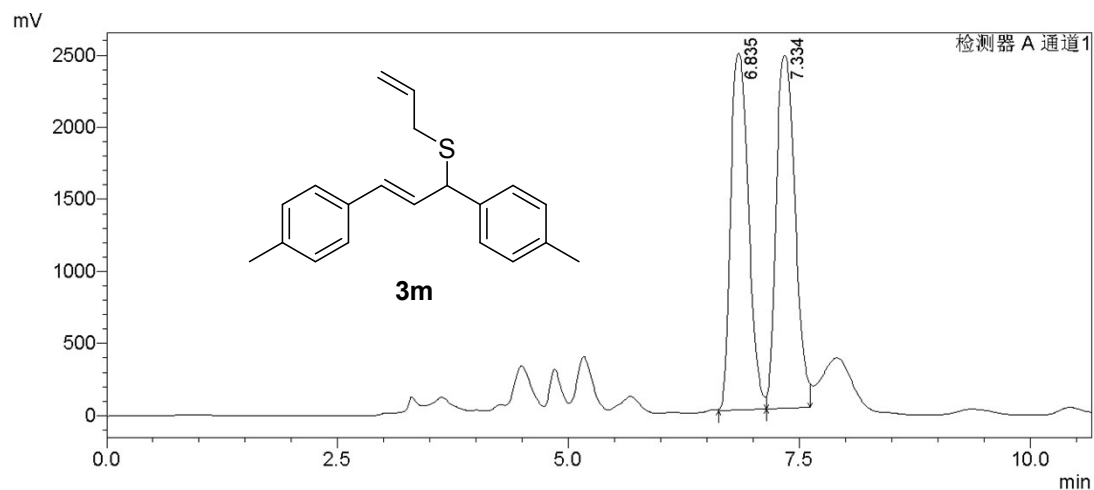

| Peak No. | R. Time | Peak Area | Peak Hight | Area Percent |
|----------|---------|-----------|------------|--------------|
| 1        | 6.835   | 33169402  | 2471080    | 48.746       |
| 2        | 7.334   | 34876332  | 2447695    | 51.254       |
| Total    |         | 68045734  | 4918775    | 100.000      |

### Rac-3m

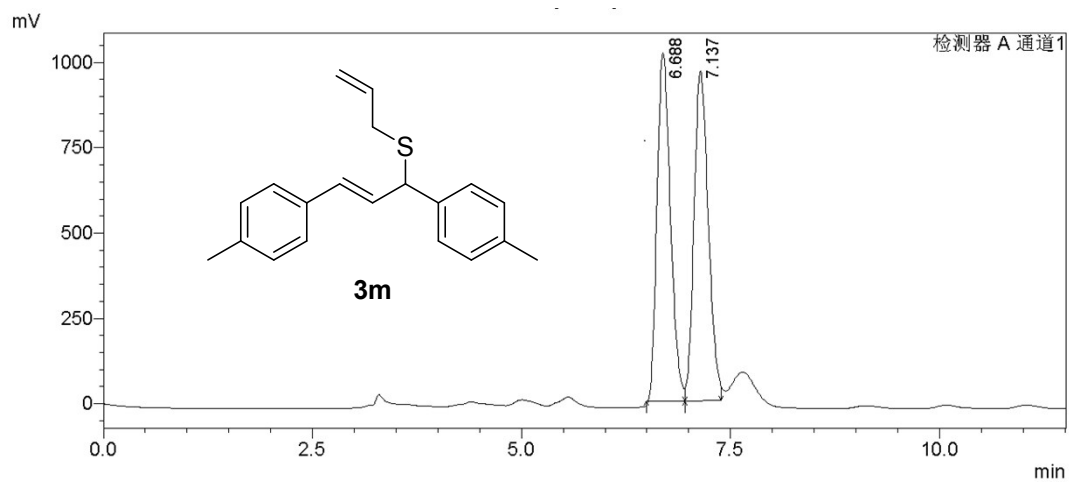

| Peak No. | R. Time | Peak Area | Peak Hight | Area Percent |
|----------|---------|-----------|------------|--------------|
| 1        | 6.688   | 11375875  | 1018782    | 49.767       |
| 2        | 7.137   | 11482232  | 965018     | 50.233       |
| Total    |         | 22858107  | 1983799    | 100.000      |

Figure 1. Single crystal data 3c

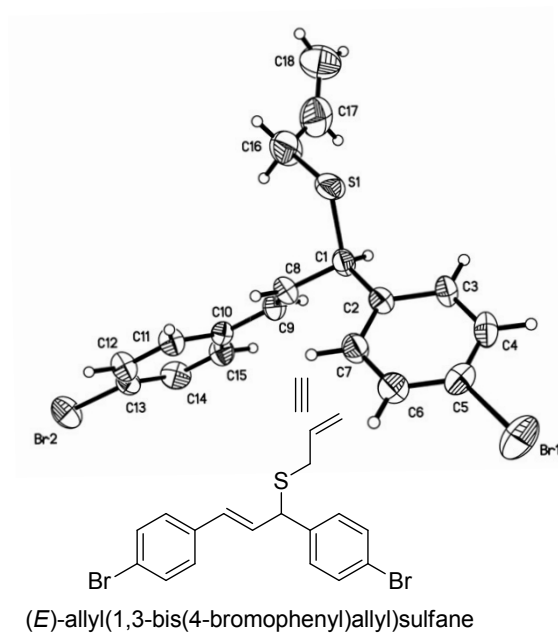

Table 1. Crystal data and structure refinement for mo\_160425b.

|                                   |                                                   |          |
|-----------------------------------|---------------------------------------------------|----------|
| Identification code               | mo_160425b                                        |          |
| Empirical formula                 | C <sub>18</sub> H <sub>16</sub> Br <sub>2</sub> S |          |
| Formula weight                    | 424.19                                            |          |
| Temperature                       | 293(2) K                                          |          |
| Wavelength                        | 0.71073 Å                                         |          |
| Crystal system                    | Orthorhombic                                      |          |
| Space group                       | P2 <sub>1</sub> 2 <sub>1</sub> 2 <sub>1</sub>     |          |
| Unit cell dimensions              | a = 7.604(8) Å                                    | α = 90°. |
|                                   | b = 9.541(10) Å                                   | β = 90°. |
|                                   | c = 24.58(3) Å                                    | γ = 90°. |
| Volume                            | 1783(3) Å <sup>3</sup>                            |          |
| Z                                 | 4                                                 |          |
| Density (calculated)              | 1.580 Mg/m <sup>3</sup>                           |          |
| Absorption coefficient            | 4.654 mm <sup>-1</sup>                            |          |
| F(000)                            | 840                                               |          |
| Crystal size                      | 0.410 x 0.380 x 0.100 mm <sup>3</sup>             |          |
| Theta range for data collection   | 2.804 to 27.099°.                                 |          |
| Index ranges                      | -6 ≤ h ≤ 9, -12 ≤ k ≤ 9, -31 ≤ l ≤ 31             |          |
| Reflections collected             | 21002                                             |          |
| Independent reflections           | 3893 [R(int) = 0.0662]                            |          |
| Completeness to theta = 25.242°   | 99.8 %                                            |          |
| Absorption correction             | Semi-empirical from equivalents                   |          |
| Refinement method                 | Full-matrix least-squares on F <sup>2</sup>       |          |
| Data / restraints / parameters    | 3893 / 18 / 190                                   |          |
| Goodness-of-fit on F <sup>2</sup> | 1.015                                             |          |
| Final R indices [I > 2σ(I)]       | R1 = 0.0528, wR2 = 0.0964                         |          |
| R indices (all data)              | R1 = 0.1302, wR2 = 0.1194                         |          |
| Absolute structure parameter      | -0.012(8)                                         |          |
| Largest diff. peak and hole       | 0.371 and -0.404 e.Å <sup>-3</sup>                |          |

Table 2. Bond lengths [ $\text{\AA}$ ] and angles [ $^\circ$ ] for mo\_160425b.

---

|              |           |
|--------------|-----------|
| Br(1)-C(5)   | 1.887(8)  |
| S(1)-C(16)   | 1.809(11) |
| S(1)-C(1)    | 1.846(8)  |
| C(1)-C(2)    | 1.491(10) |
| C(1)-C(8)    | 1.500(9)  |
| C(1)-H(1)    | 0.9800    |
| C(2)-C(7)    | 1.391(10) |
| C(2)-C(3)    | 1.406(10) |
| Br(2)-C(13)  | 1.907(7)  |
| C(3)-C(4)    | 1.386(11) |
| C(3)-H(3)    | 0.9300    |
| C(5)-C(6)    | 1.358(12) |
| C(5)-C(4)    | 1.383(11) |
| C(4)-H(4)    | 0.9300    |
| C(6)-C(7)    | 1.379(10) |
| C(6)-H(6)    | 0.9300    |
| C(7)-H(7)    | 0.9300    |
| C(8)-C(9)    | 1.308(9)  |
| C(8)-H(8)    | 0.9300    |
| C(9)-C(10)   | 1.463(9)  |
| C(9)-H(9)    | 0.9300    |
| C(10)-C(15)  | 1.384(10) |
| C(10)-C(11)  | 1.386(9)  |
| C(11)-C(12)  | 1.380(10) |
| C(11)-H(11)  | 0.9300    |
| C(12)-C(13)  | 1.351(10) |
| C(12)-H(12)  | 0.9300    |
| C(13)-C(14)  | 1.364(11) |
| C(14)-C(15)  | 1.391(12) |
| C(14)-H(14)  | 0.9300    |
| C(15)-H(15)  | 0.9300    |
| C(16)-C(17)  | 1.341(16) |
| C(16)-H(16A) | 0.9700    |
| C(16)-H(16B) | 0.9700    |
| C(17)-C(18)  | 1.291(15) |
| C(17)-H(17)  | 0.9300    |



|                   |          |
|-------------------|----------|
| C(18)-H(18A)      | 0.9300   |
| C(18)-H(18B)      | 0.9300   |
| C(16)-S(1)-C(1)   | 104.1(5) |
| C(2)-C(1)-C(8)    | 114.5(6) |
| C(2)-C(1)-S(1)    | 106.8(5) |
| C(8)-C(1)-S(1)    | 110.4(5) |
| C(2)-C(1)-H(1)    | 108.3    |
| C(8)-C(1)-H(1)    | 108.3    |
| S(1)-C(1)-H(1)    | 108.3    |
| C(7)-C(2)-C(3)    | 117.4(7) |
| C(7)-C(2)-C(1)    | 122.6(6) |
| C(3)-C(2)-C(1)    | 120.0(6) |
| C(4)-C(3)-C(2)    | 120.1(7) |
| C(4)-C(3)-H(3)    | 119.9    |
| C(2)-C(3)-H(3)    | 119.9    |
| C(6)-C(5)-C(4)    | 119.6(7) |
| C(6)-C(5)-Br(1)   | 120.9(7) |
| C(4)-C(5)-Br(1)   | 119.5(6) |
| C(5)-C(4)-C(3)    | 120.7(7) |
| C(5)-C(4)-H(4)    | 119.7    |
| C(3)-C(4)-H(4)    | 119.7    |
| C(5)-C(6)-C(7)    | 120.6(8) |
| C(5)-C(6)-H(6)    | 119.7    |
| C(7)-C(6)-H(6)    | 119.7    |
| C(6)-C(7)-C(2)    | 121.6(7) |
| C(6)-C(7)-H(7)    | 119.2    |
| C(2)-C(7)-H(7)    | 119.2    |
| C(9)-C(8)-C(1)    | 126.1(7) |
| C(9)-C(8)-H(8)    | 116.9    |
| C(1)-C(8)-H(8)    | 116.9    |
| C(8)-C(9)-C(10)   | 127.5(7) |
| C(8)-C(9)-H(9)    | 116.2    |
| C(10)-C(9)-H(9)   | 116.2    |
| C(15)-C(10)-C(11) | 116.9(6) |
| C(15)-C(10)-C(9)  | 120.0(7) |
| C(11)-C(10)-C(9)  | 123.1(6) |
| C(12)-C(11)-C(10) | 121.8(6) |

|                     |           |
|---------------------|-----------|
| C(12)-C(11)-H(11)   | 119.1     |
| C(10)-C(11)-H(11)   | 119.1     |
| C(13)-C(12)-C(11)   | 119.8(7)  |
| C(13)-C(12)-H(12)   | 120.1     |
| C(11)-C(12)-H(12)   | 120.1     |
| C(12)-C(13)-C(14)   | 120.9(6)  |
| C(12)-C(13)-Br(2)   | 120.9(6)  |
| C(14)-C(13)-Br(2)   | 118.2(6)  |
| C(13)-C(14)-C(15)   | 119.3(7)  |
| C(13)-C(14)-H(14)   | 120.3     |
| C(15)-C(14)-H(14)   | 120.3     |
| C(10)-C(15)-C(14)   | 121.4(7)  |
| C(10)-C(15)-H(15)   | 119.3     |
| C(14)-C(15)-H(15)   | 119.3     |
| C(17)-C(16)-S(1)    | 117.1(8)  |
| C(17)-C(16)-H(16A)  | 108.0     |
| S(1)-C(16)-H(16A)   | 108.0     |
| C(17)-C(16)-H(16B)  | 108.0     |
| S(1)-C(16)-H(16B)   | 108.0     |
| H(16A)-C(16)-H(16B) | 107.3     |
| C(18)-C(17)-C(16)   | 134.0(14) |
| C(18)-C(17)-H(17)   | 113.0     |
| C(16)-C(17)-H(17)   | 113.0     |
| C(17)-C(18)-H(18A)  | 120.0     |
| C(17)-C(18)-H(18B)  | 120.0     |
| H(18A)-C(18)-H(18B) | 120.0     |

---

Symmetry transformations used to generate equivalent atoms:
